# Supplementary material for: Effect of Low-Fat Diet in Obese Mice Lacking Toll-like Receptors
Source: MDPI journal article supplement (doi:10.3390/nu10101464), 2018-10-09
Supplement: s1 [file s1]

**Supplemental Table S1.** The number and proportions of the categories of small RNAs identified from the next generation sequencing.

| B6 CTRL           |              |        |             |        | B6 DIO            |              |        |             |        | B6 Diet           |              |        |             |        |
|-------------------|--------------|--------|-------------|--------|-------------------|--------------|--------|-------------|--------|-------------------|--------------|--------|-------------|--------|
| Category          | unique sRNAs | %      | total sRNAs | %      | Category          | unique sRNAs | %      | total sRNAs | %      | Category          | unique sRNAs | %      | total sRNAs | %      |
| Total             | 141269       | 100%   | 5930301     | 100%   | Total             | 240478       | 100%   | 5927735     | 100%   | Total             | 86415        | 100%   | 5898832     | 100%   |
| Mapping to genome | 76583        | 54.21% | 4736082     | 79.86% | Mapping to genome | 150523       | 62.59% | 4681507     | 78.98% | Mapping to genome | 43950        | 50.86% | 4815750     | 81.64% |
| exon_antisense    | 601          | 0.43%  | 944         | 0.02%  | exon_antisense    | 1162         | 0.48%  | 1827        | 0.03%  | exon_antisense    | 496          | 0.57%  | 628         | 0.01%  |
| exon_sense        | 17161        | 12.15% | 19652       | 0.33%  | exon_sense        | 24657        | 10.25% | 34234       | 0.58%  | exon_sense        | 11213        | 12.98% | 12493       | 0.21%  |
| intron_antisense  | 1470         | 1.04%  | 1828        | 0.03%  | intron_antisense  | 3439         | 1.43%  | 5951        | 0.10%  | intron_antisense  | 1409         | 1.63%  | 1687        | 0.03%  |
| intron_sense      | 5831         | 4.13%  | 8300        | 0.14%  | intron_sense      | 5893         | 2.45%  | 8839        | 0.15%  | intron_sense      | 3626         | 4.20%  | 7538        | 0.13%  |
| miRNA             | 2827         | 2.00%  | 4531022     | 76.40% | miRNA             | 2884         | 1.20%  | 4269688     | 72.03% | miRNA             | 2855         | 3.30%  | 4722821     | 80.06% |
| rRNA              | 11531        | 8.16%  | 91390       | 1.54%  | rRNA              | 8843         | 3.68%  | 40904       | 0.69%  | rRNA              | 5925         | 6.86%  | 29374       | 0.50%  |
| repeat            | 9937         | 7.03%  | 15039       | 0.25%  | repeat            | 23098        | 9.61%  | 51467       | 0.87%  | repeat            | 4757         | 5.50%  | 7285        | 0.12%  |
| scRNA             | 121          | 0.09%  | 21453       | 0.36%  | scRNA             | 121          | 0.05%  | 6779        | 0.11%  | scRNA             | 101          | 0.12%  | 6495        | 0.11%  |
| snRNA             | 1112         | 0.79%  | 4854        | 0.08%  | snRNA             | 799          | 0.33%  | 3657        | 0.06%  | snRNA             | 723          | 0.84%  | 4211        | 0.07%  |
| snoRNA            | 1065         | 0.75%  | 4076        | 0.07%  | snoRNA            | 799          | 0.33%  | 3049        | 0.05%  | snoRNA            | 770          | 0.89%  | 2633        | 0.04%  |
| srpRNA            | 147          | 0.10%  | 292         | 0.00%  | srpRNA            | 82           | 0.03%  | 167         | 0.00%  | srpRNA            | 64           | 0.07%  | 102         | 0.00%  |
| tRNA              | 7093         | 5.02%  | 60630       | 1.02%  | tRNA              | 4983         | 2.07%  | 30820       | 0.52%  | tRNA              | 4000         | 4.63%  | 26489       | 0.45%  |
| unann             | 82373        | 58.31% | 1170821     | 19.74% | unann             | 163718       | 68.08% | 1470353     | 24.80% | unann             | 50476        | 58.41% | 1077076     | 18.26% |
| TLR5KO CTRL       |              |        |             |        | TLR5KO DIO        |              |        |             |        | TLR5KO Diet       |              |        |             |        |
| Category          | unique sRNAs | %      | total sRNAs | %      | Category          | unique sRNAs | %      | total sRNAs | %      | Category          | unique sRNAs | %      | total sRNAs | %      |
| Total             | 174192       | 100%   | 5901707     | 100%   | Total             | 161343       | 100%   | 5890537     | 100%   | Total             | 195072       | 100%   | 5901509     | 100%   |
| Mapping to genome | 79123        | 45.42% | 4623954     | 78.35% | Mapping to genome | 89281        | 55.34% | 4703871     | 79.85% | Mapping to genome | 101087       | 51.82% | 4546575     | 77.04% |
| exon_antisense    | 462          | 0.27%  | 628         | 0.01%  | exon_antisense    | 529          | 0.33%  | 631         | 0.01%  | exon_antisense    | 555          | 0.28%  | 783         | 0.01%  |
| exon_sense        | 25951        | 14.90% | 28186       | 0.48%  | exon_sense        | 37044        | 22.96% | 41831       | 0.71%  | exon_sense        | 29650        | 15.20% | 33140       | 0.56%  |
| intron_antisense  | 1383         | 0.79%  | 1602        | 0.03%  | intron_antisense  | 1424         | 0.88%  | 1618        | 0.03%  | intron_antisense  | 1544         | 0.79%  | 2023        | 0.03%  |
| intron_sense      | 8471         | 4.86%  | 11906       | 0.20%  | intron_sense      | 13763        | 8.53%  | 17989       | 0.31%  | intron_sense      | 7578         | 3.88%  | 8798        | 0.15%  |
| miRNA             | 2870         | 1.65%  | 4343798     | 73.60% | miRNA             | 2926         | 1.81%  | 4533273     | 76.96% | miRNA             | 2796         | 1.43%  | 4196062     | 71.10% |
| rRNA              | 20609        | 11.83% | 196147      | 3.32%  | rRNA              | 10796        | 6.69%  | 55826       | 0.95%  | rRNA              | 11612        | 5.95%  | 61176       | 1.04%  |
| repeat            | 8857         | 5.08%  | 12740       | 0.22%  | repeat            | 10166        | 6.30%  | 13097       | 0.22%  | repeat            | 12022        | 6.16%  | 18297       | 0.31%  |

|                   |              |        |              |        |                   |              |        |              |        |                   |              |        |              |        |
|-------------------|--------------|--------|--------------|--------|-------------------|--------------|--------|--------------|--------|-------------------|--------------|--------|--------------|--------|
| scRNA             | 175          | 0.10%  | 17525        | 0.30%  | scRNA             | 178          | 0.11%  | 11233        | 0.19%  | scRNA             | 160          | 0.08%  | 18107        | 0.31%  |
| snRNA             | 1743         | 1.00%  | 6619         | 0.11%  | snRNA             | 1489         | 0.92%  | 6414         | 0.11%  | snRNA             | 1261         | 0.65%  | 4936         | 0.08%  |
| snoRNA            | 1348         | 0.77%  | 5243         | 0.09%  | snoRNA            | 1445         | 0.90%  | 6618         | 0.11%  | snoRNA            | 1203         | 0.62%  | 5175         | 0.09%  |
| srpRNA            | 298          | 0.17%  | 1105         | 0.02%  | srpRNA            | 106          | 0.07%  | 272          | 0.00%  | srpRNA            | 127          | 0.07%  | 315          | 0.01%  |
| tRNA              | 13468        | 7.73%  | 137147       | 2.32%  | tRNA              | 6815         | 4.22%  | 42082        | 0.71%  | tRNA              | 12243        | 6.28%  | 253634       | 4.30%  |
| unann             | 88557        | 50.84% | 1139061      | 19.30% | unann             | 74662        | 46.28% | 1159653      | 19.69% | unann             | 114321       | 58.60% | 1299063      | 22.01% |
| TLR2KO CTRL       |              |        |              |        | TLR2KO DIO        |              |        |              |        | TLR2KO Diet       |              |        |              |        |
| Category          | unique sRNAs | %      | total sRNAs  | %      | Category          | unique sRNAs | %      | total sRNAs  | %      | Category          | unique sRNAs | %      | total sRNAs  | %      |
| Total             | 218993       | 100%   | 1183462<br>2 | 100%   | Total             | 178892       | 100%   | 1306816<br>5 | 100%   | Total             | 166532       | 100%   | 1212940<br>4 | 100%   |
| Mapping to genome | 108599       | 49.59% | 9681121      | 81.80% | Mapping to genome | 97092        | 54.27% | 1094019<br>1 | 83.72% | Mapping to genome | 84767        | 50.90% | 9994121      | 82.40% |
| exon_antisense    | 738          | 0.34%  | 892          | 0.01%  | exon_antisense    | 1012         | 0.57%  | 1125         | 0.01%  | exon_antisense    | 684          | 0.41%  | 829          | 0.01%  |
| exon_sense        | 44515        | 20.33% | 52101        | 0.44%  | exon_sense        | 41121        | 22.99% | 46605        | 0.36%  | exon_sense        | 32985        | 19.81% | 37965        | 0.31%  |
| intron_antisense  | 1812         | 0.83%  | 2405         | 0.02%  | intron_antisense  | 2582         | 1.44%  | 3386         | 0.03%  | intron_antisense  | 1850         | 1.11%  | 2230         | 0.02%  |
| intron_sense      | 18033        | 8.23%  | 28612        | 0.24%  | intron_sense      | 11115        | 6.21%  | 15336        | 0.12%  | intron_sense      | 12871        | 7.73%  | 19423        | 0.16%  |
| miRNA             | 3940         | 1.80%  | 9333779      | 78.87% | miRNA             | 3769         | 2.11%  | 1071723<br>4 | 82.01% | miRNA             | 3644         | 2.19%  | 9789754      | 80.71% |
| rRNA              | 15819        | 7.22%  | 165085       | 1.39%  | rRNA              | 9899         | 5.53%  | 62092        | 0.48%  | rRNA              | 8632         | 5.18%  | 53974        | 0.44%  |
| repeat            | 12842        | 5.86%  | 21485        | 0.18%  | repeat            | 10746        | 6.01%  | 15812        | 0.12%  | repeat            | 10595        | 6.36%  | 14778        | 0.12%  |
| scRNA             | 200          | 0.09%  | 48843        | 0.41%  | scRNA             | 141          | 0.08%  | 10501        | 0.08%  | scRNA             | 164          | 0.10%  | 20945        | 0.17%  |
| snRNA             | 1558         | 0.71%  | 9305         | 0.08%  | snRNA             | 1264         | 0.71%  | 6658         | 0.05%  | snRNA             | 1216         | 0.73%  | 6537         | 0.05%  |
| snoRNA            | 1370         | 0.63%  | 5411         | 0.05%  | snoRNA            | 1016         | 0.57%  | 3349         | 0.03%  | snoRNA            | 1049         | 0.63%  | 3719         | 0.03%  |
| srpRNA            | 241          | 0.11%  | 779          | 0.01%  | srpRNA            | 147          | 0.08%  | 298          | 0.00%  | srpRNA            | 86           | 0.05%  | 234          | 0.00%  |
| tRNA              | 12250        | 5.59%  | 135838       | 1.15%  | tRNA              | 8125         | 4.54%  | 100681       | 0.77%  | tRNA              | 6472         | 3.89%  | 74657        | 0.62%  |
| unann             | 105675       | 48.25% | 2030087      | 17.15% | unann             | 87955        | 49.17% | 2085088      | 15.96% | unann             | 86284        | 51.81% | 2104359      | 17.35% |
| TLR4KO CTRL       |              |        |              |        | TLR4KO DIO        |              |        |              |        | TLR4KO Diet       |              |        |              |        |
| Category          | unique sRNAs | %      | total sRNAs  | %      | Category          | unique sRNAs | %      | total sRNAs  | %      | Category          | unique sRNAs | %      | total sRNAs  | %      |
| Total             | 164982       | 100%   | 1181456<br>1 | 100%   | Total             | 109268       | 100%   | 1000068<br>9 | 100%   | Total             | 205689       | 100%   | 1073692<br>1 | 100%   |
| Mapping to genome | 71840        | 43.54% | 9390339      | 79.48% | Mapping to genome | 46018        | 42.11% | 8173299      | 81.73% | Mapping to genome | 111688       | 54.30% | 8737687      | 81.38% |
| exon_antisense    | 486          | 0.29%  | 720          | 0.01%  | exon_antisense    | 560          | 0.0051 | 833          | 0.0001 | exon_antisense    | 1208         | 0.59%  | 1621         | 0.02%  |
| exon_sense        | 23805        | 14.43% | 26912        | 0.23%  | exon_sense        | 17773        | 16.27% | 20038        | 0.20%  | exon_sense        | 26566        | 12.92% | 31441        | 0.29%  |
| intron_antisense  | 1391         | 0.84%  | 1803         | 0.02%  | intron_           | 1670         | 1.53%  | 1940         | 0.02%  | intron_           | 3217         | 1.56%  | 4158         | 0.04%  |

|              |       |        |         |        |              |       |        |         |        |              |        |        |         |        |
|--------------|-------|--------|---------|--------|--------------|-------|--------|---------|--------|--------------|--------|--------|---------|--------|
|              |       |        |         |        | antisense    |       |        |         |        | antisense    |        |        |         |        |
| intron_sense | 9913  | 6.01%  | 12985   | 0.11%  | intron_sense | 4897  | 4.48%  | 10318   | 0.10%  | intron_sense | 9029   | 4.39%  | 16906   | 0.16%  |
| miRNA        | 3539  | 2.15%  | 9192905 | 77.81% | miRNA        | 3141  | 2.87%  | 8075567 | 80.75% | miRNA        | 3797   | 1.85%  | 8489118 | 79.06% |
| rRNA         | 13749 | 8.33%  | 79695   | 0.67%  | rRNA         | 6955  | 6.37%  | 38624   | 0.39%  | rRNA         | 10094  | 4.91%  | 59485   | 0.55%  |
| repeat       | 8009  | 4.85%  | 11637   | 0.10%  | repeat       | 4330  | 3.96%  | 6482    | 0.06%  | repeat       | 14912  | 7.25%  | 26451   | 0.25%  |
| scRNA        | 157   | 0.10%  | 29952   | 0.25%  | scRNA        | 97    | 0.09%  | 3174    | 0.03%  | scRNA        | 149    | 0.07%  | 9813    | 0.09%  |
| snRNA        | 1410  | 0.85%  | 7732    | 0.07%  | snRNA        | 727   | 0.67%  | 4143    | 0.04%  | snRNA        | 1150   | 0.56%  | 6900    | 0.06%  |
| snoRNA       | 1494  | 0.91%  | 6684    | 0.06%  | snoRNA       | 753   | 0.69%  | 2271    | 0.02%  | snoRNA       | 1070   | 0.52%  | 3165    | 0.03%  |
| srpRNA       | 122   | 0.07%  | 236     | 0.00%  | srpRNA       | 58    | 0.05%  | 184     | 0.00%  | srpRNA       | 100    | 0.05%  | 241     | 0.00%  |
| tRNA         | 7538  | 4.57%  | 54943   | 0.47%  | tRNA         | 4178  | 3.82%  | 27930   | 0.28%  | tRNA         | 5721   | 2.78%  | 45490   | 0.42%  |
| unann        | 93369 | 56.59% | 2388357 | 20.22% | unann        | 64129 | 58.69% | 1809185 | 18.09% | unann        | 128676 | 62.56% | 2042132 | 19.02% |

**Supplemental Table S2.** The putative targets regulated by the dysregulated miRNAs in the LFD-fed mice.

**Supplemental Table S2A. C57BL6.**

| TARGET_GENE | GENE_DESCRIPTION                                                                | KEGG | OBSERVED_MIRNA | OE      |
|-------------|---------------------------------------------------------------------------------|------|----------------|---------|
| NRDG3       |                                                                                 | 0    | 1              | 128.25  |
| HSPA1B      | heat shock protein 1B                                                           | 6    | 1              | 16.0313 |
| GJA3        | gap junction protein, alpha 3                                                   | 0    | 1              | 12.825  |
| ANXA2       | annexin A2                                                                      | 0    | 1              | 6.75001 |
| ANP32B      | acidic (leucine-rich) nuclear phosphoprotein 32 family, member B                | 0    | 1              | 6.41249 |
| ALDOA       | aldolase A, fructose-bisphosphate                                               | 4    | 1              | 5.34375 |
| JUND        | Jun proto-oncogene related gene d                                               | 1    | 1              | 5.13    |
| RTKN        | rhotekin                                                                        | 0    | 1              | 4.93269 |
| SRSF9       | serine/arginine-rich splicing factor 9                                          | 1    | 1              | 4.93269 |
| CDK9        | cyclin-dependent kinase 9 (CDC2-related kinase)                                 | 0    | 1              | 4.75    |
| PHAX        | phosphorylated adaptor for RNA export                                           | 1    | 1              | 4.275   |
| HSPD1       | heat shock protein 1 (chaperonin)                                               | 2    | 1              | 3.77206 |
| SNX15       | sorting nexin 15                                                                | 0    | 1              | 3.77206 |
| TRPV6       | transient receptor potential cation channel, subfamily V, member 6              | 1    | 1              | 3.77206 |
| DAZAP1      | DAZ associated protein 1                                                        | 0    | 1              | 3.5625  |
| HSP90B1     | heat shock protein 90, beta (Grp94), member 1                                   | 4    | 1              | 3.5625  |
| SMAP1       | stromal membrane-associated protein 1                                           | 1    | 2              | 3.5625  |
| TMED3       | transmembrane emp24 domain containing 3                                         | 0    | 1              | 3.5625  |
| TMSB4X      | thymosin, beta 4, X chromosome                                                  | 1    | 1              | 3.5625  |
| IRX5        | Iroquois related homeobox 5 (Drosophila)                                        | 0    | 1              | 3.46621 |
| SLC25A1     | solute carrier family 25 (mitochondrial carrier, citrate transporter), member 1 | 0    | 1              | 3.375   |

|           |                                                                                   |    |   |         |
|-----------|-----------------------------------------------------------------------------------|----|---|---------|
| HFE2      | hemochromatosis type 2 (juvenile) (human homolog)                                 | 0  | 1 | 3.28846 |
| TMEM178   | transmembrane protein 178                                                         | 0  | 2 | 3.28846 |
| ACTB      | actin, beta                                                                       | 12 | 1 | 3.12805 |
| GIT1      | G protein-coupled receptor kinase-interactor 1                                    | 2  | 2 | 3.01765 |
| KTN1      | kinectin 1                                                                        | 0  | 1 | 2.98256 |
| TRAPPC3   | trafficking protein particle complex 3                                            | 0  | 1 | 2.78804 |
| MAPK3     | mitogen-activated protein kinase 3                                                | 49 | 1 | 2.72872 |
| ATXN2     | ataxin 2                                                                          | 0  | 1 | 2.67187 |
| CALM2     | calmodulin 2                                                                      | 15 | 1 | 2.67187 |
| BRPF1     | bromodomain and PHD finger containing, 1                                          | 0  | 1 | 2.61735 |
| SPATS2    | spermatogenesis associated, serine-rich 2                                         | 0  | 1 | 2.565   |
| RRBP1     | ribosome binding protein 1                                                        | 1  | 1 | 2.46633 |
| SNX2      | sorting nexin 2                                                                   | 0  | 1 | 2.46633 |
| CACHD1    | cache domain containing 1                                                         | 0  | 1 | 2.41981 |
| HAND2     | heart and neural crest derivatives expressed transcript 2                         | 0  | 1 | 2.41981 |
| STC2      | stanniocalcin 2                                                                   | 0  | 1 | 2.41981 |
| PDGFA     | platelet derived growth factor, alpha                                             | 10 | 1 | 2.29017 |
| SLC35A4   | solute carrier family 35, member A4                                               | 0  | 1 | 2.29017 |
| FSCN1     | fascin homolog 1, actin bundling protein (Strongylocentrotus purpuratus)          | 0  | 1 | 2.21122 |
| GPX7      | glutathione peroxidase 7                                                          | 2  | 1 | 2.17372 |
| MAF1      | MAF1 homolog (S. cerevisiae)                                                      | 0  | 1 | 2.1375  |
| ZFP423    | zinc finger protein 423                                                           | 0  | 1 | 2.10247 |
| CCNL1     | cyclin L1                                                                         | 0  | 1 | 2.06854 |
| PLCL2     | phospholipase C-like 2                                                            | 0  | 1 | 2.00391 |
| DHX15     | DEAH (Asp-Glu-Ala-His) box polypeptide 15                                         | 1  | 1 | 1.97307 |
| RGS7      | regulator of G protein signaling 7                                                | 0  | 1 | 1.94318 |
| MAB21L1   | mab-21-like 1 (C. elegans)                                                        | 0  | 1 | 1.91418 |
| FXR2      | fragile X mental retardation, autosomal homolog 2                                 | 0  | 1 | 1.88602 |
| HDAC4     | histone deacetylase 4                                                             | 0  | 1 | 1.88602 |
| NCOR2     | nuclear receptor co-repressor 2                                                   | 1  | 1 | 1.88602 |
| NONO      | non-POU-domain-containing, octamer binding protein                                | 0  | 1 | 1.85869 |
| CDC42BPB  | CDC42 binding protein kinase beta                                                 | 0  | 1 | 1.83215 |
| CNN3      | calponin 3, acidic                                                                | 0  | 1 | 1.83215 |
| GABARAPL2 | gamma-aminobutyric acid (GABA) A receptor-associated protein-like 2               | 1  | 1 | 1.83215 |
| TBP       | TATA box binding protein                                                          | 2  | 1 | 1.7331  |
| SEC22B    | SEC22 vesicle trafficking protein homolog B (S. cerevisiae)                       | 2  | 1 | 1.6875  |
| CITED2    | Cbp/p300-interacting transactivator, with Glu/Asp-rich carboxy-terminal domain, 2 | 0  | 2 | 1.62342 |
| SP2       | Sp2 transcription factor                                                          | 0  | 1 | 1.62342 |

|         |                                                                                |   |   |         |
|---------|--------------------------------------------------------------------------------|---|---|---------|
| AP3D1   | adaptor-related protein complex 3, delta 1 subunit                             | 1 | 1 | 1.60313 |
| FAM135A | family with sequence similarity 135, member A                                  | 0 | 1 | 1.60313 |
| NOTCH3  | Notch gene homolog 3 (Drosophila)                                              | 2 | 1 | 1.60313 |
| ARSJ    | arylsulfatase J                                                                | 0 | 1 | 1.56402 |
| YTHDF2  | YTH domain family 2                                                            | 0 | 1 | 1.56402 |
| KIF2A   | kinesin family member 2A                                                       | 0 | 1 | 1.50882 |
| NPEPPS  | aminopeptidase puromycin sensitive                                             | 0 | 1 | 1.50882 |
| PDCD4   | programmed cell death 4                                                        | 0 | 1 | 1.50882 |
| FZD7    | frizzled homolog 7 (Drosophila)                                                | 4 | 2 | 1.5     |
| FNDC3A  | fibronectin type III domain containing 3A                                      | 0 | 2 | 1.49128 |
| KCNIP3  | Kv channel interacting protein 3, calsenilin                                   | 0 | 1 | 1.49128 |
| OTX2    | orthodenticle homolog 2 (Drosophila)                                           | 0 | 1 | 1.45739 |
| WDR1    | WD repeat domain 1                                                             | 0 | 1 | 1.45739 |
| CAPRIN1 | cell cycle associated protein 1                                                | 0 | 2 | 1.43296 |
| FAM108C | family with sequence similarity 108, member C                                  | 0 | 1 | 1.39402 |
| SLITRK4 | SLIT and NTRK-like family, member 4                                            | 0 | 1 | 1.39402 |
| USP46   | ubiquitin specific peptidase 46                                                | 0 | 2 | 1.39402 |
| MATR3   | matrin 3                                                                       | 0 | 1 | 1.36436 |
| BDNF    | brain derived neurotrophic factor                                              | 3 | 2 | 1.35    |
| MEST    | mesoderm specific transcript                                                   | 0 | 1 | 1.35    |
| ANXA4   | annexin A4                                                                     | 0 | 1 | 1.33593 |
| GTF2H1  | general transcription factor II H, polypeptide 1                               | 2 | 1 | 1.33593 |
| CD320   | CD320 antigen                                                                  | 0 | 1 | 1.32216 |
| FAM108B | family with sequence similarity 108, member B                                  | 0 | 1 | 1.32216 |
| HLTF    | helicase-like transcription factor                                             | 0 | 1 | 1.30867 |
| MPZ     | myelin protein zero                                                            | 1 | 1 | 1.30867 |
| TRA2B   | transformer 2 beta homolog (Drosophila)                                        | 1 | 1 | 1.30867 |
| BCKDK   | branched chain ketoacid dehydrogenase kinase                                   | 0 | 1 | 1.29546 |
| HMG1    | high mobility group nucleosomal binding domain 1                               | 0 | 1 | 1.29546 |
| POLDIP3 | polymerase (DNA-directed), delta interacting protein 3                         | 0 | 1 | 1.29546 |
| TRIM2   | tripartite motif-containing 2                                                  | 0 | 3 | 1.29111 |
| MED1    | mediator complex subunit 1                                                     | 0 | 2 | 1.28895 |
| PAQR9   | progesterone and adiponectin receptor family member IX                         | 0 | 1 | 1.2825  |
| ANGPT2  | angiopoietin 2                                                                 | 0 | 1 | 1.2698  |
| CAP1    | CAP, adenylate cyclase-associated protein 1 (yeast)                            | 0 | 1 | 1.25736 |
| FUNDC2  | FUN14 domain containing 2                                                      | 0 | 1 | 1.25736 |
| REV3L   | REV3-like, catalytic subunit of DNA polymerase zeta RAD54 like (S. cerevisiae) | 1 | 1 | 1.25736 |
| SLITRK6 | SLIT and NTRK-like family, member 6                                            | 0 | 1 | 1.25736 |

|           |                                                                                                |   |   |         |
|-----------|------------------------------------------------------------------------------------------------|---|---|---------|
| TNFRSF11B | tumor necrosis factor receptor superfamily, member 11b (osteoprotegerin)                       | 1 | 1 | 1.25736 |
| EPB4.1L5  | erythrocyte protein band 4.1-like 5                                                            | 0 | 1 | 1.24514 |
| HIAT1     | hippocampus abundant gene transcript 1                                                         | 0 | 1 | 1.23317 |
| PDCD10    | programmed cell death 10                                                                       | 0 | 1 | 1.2099  |
| FLI1      | Friend leukemia integration 1                                                                  | 0 | 1 | 1.1986  |
| ARCN1     | archain 1                                                                                      | 0 | 1 | 1.1875  |
| GALNT1    | UDP-N-acetyl-alpha-D-galactosamine:polypeptide N-acetylgalactosaminyltransferase 1             | 2 | 1 | 1.1875  |
| HNRNPK    | heterogeneous nuclear ribonucleoprotein K                                                      | 1 | 1 | 1.1875  |
| PICALM    | phosphatidylinositol binding clathrin assembly protein                                         | 0 | 1 | 1.1875  |
| CCDC97    | coiled-coil domain containing 97                                                               | 0 | 1 | 1.1766  |
| GLIS2     | GLIS family zinc finger 2                                                                      | 0 | 1 | 1.16591 |
| ATP6V1B2  | ATPase, H <sup>+</sup> transporting, lysosomal V1 subunit B2                                   | 4 | 1 | 1.15541 |
| TCFAP2C   | transcription factor AP-2, gamma                                                               | 0 | 1 | 1.15541 |
| P4HA1     | procollagen-proline, 2-oxoglutarate 4-dioxygenase (proline 4-hydroxylase), alpha 1 polypeptide | 2 | 1 | 1.14509 |
| CNNM4     | cyclin M4                                                                                      | 0 | 1 | 1.13496 |
| DUSP6     | dual specificity phosphatase 6                                                                 | 1 | 1 | 1.13496 |
| PTPLAD1   | protein tyrosine phosphatase-like A domain containing 1                                        | 0 | 1 | 1.13496 |
| GRK6      | G protein-coupled receptor kinase 6                                                            | 2 | 1 | 1.125   |
| OCLN      | occludin                                                                                       | 4 | 1 | 1.125   |
| PHC2      | polyhomeotic-like 2 (Drosophila)                                                               | 0 | 1 | 1.125   |
| SPOP      | speckle-type POZ protein                                                                       | 0 | 1 | 1.11522 |
| RNF216    | ring finger protein 216                                                                        | 0 | 1 | 1.1056  |
| ANKRD13C  | ankyrin repeat domain 13c                                                                      | 0 | 1 | 1.09615 |
| CLTC      | clathrin, heavy polypeptide (Hc)                                                               | 4 | 1 | 1.09615 |
| SLC25A25  | solute carrier family 25 (mitochondrial carrier, phosphate carrier), member 25                 | 0 | 1 | 1.08687 |
| SNAP25    | synaptosomal-associated protein 25                                                             | 1 | 1 | 1.08687 |
| SRSF3     | serine/arginine-rich splicing factor 3                                                         | 1 | 1 | 1.08687 |
| HIC2      | hypermethylated in cancer 2                                                                    | 0 | 2 | 1.08686 |
| SRSF1     | serine/arginine-rich splicing factor 1                                                         | 1 | 2 | 1.08228 |
| KDM2B     | lysine (K)-specific demethylase 2B                                                             | 0 | 1 | 1.07773 |
| TM9SF4    | transmembrane 9 superfamily protein member 4                                                   | 0 | 1 | 1.05992 |
| EDN1      | endothelin 1                                                                                   | 4 | 1 | 1.05123 |
| FIGN      | fidgetin                                                                                       | 0 | 1 | 1.04268 |
| INO80     | INO80 homolog (S. cerevisiae)                                                                  | 0 | 1 | 1.04268 |
| SOX9      | SRY-box containing gene 9                                                                      | 0 | 1 | 1.04268 |
| SULF1     | sulfatase 1                                                                                    | 0 | 1 | 1.03428 |
| TNPO2     | transportin 2 (importin 3, karyopherin beta 2b)                                                | 0 | 1 | 1.03428 |
| CTNNBIP1  | catenin beta interacting protein 1                                                             | 1 | 1 | 1.026   |

|          |                                                          |   |   |          |
|----------|----------------------------------------------------------|---|---|----------|
| KLF11    | Kruppel-like factor 11                                   | 0 | 1 | 1.026    |
| ADAR     | adenosine deaminase, RNA-specific                        | 1 | 1 | 1.01786  |
| CPEB1    | cytoplasmic polyadenylation element binding protein 1    | 3 | 1 | 1.00984  |
| GAS2L1   | growth arrest-specific 2 like 1                          | 0 | 1 | 1.00984  |
| RIT2     | Ras-like without CAAX 2                                  | 0 | 1 | 1.00984  |
| SEN2     | SUMO/sentrin specific peptidase 2                        | 2 | 1 | 1.00984  |
| FNDC3B   | fibronectin type III domain containing 3B                | 0 | 2 | 1.00195  |
| CYTH1    | cytohesin 1                                              | 0 | 1 | 0.994186 |
| LARP4B   | La ribonucleoprotein domain family, member 4B            | 0 | 1 | 0.994186 |
| TWF1     | twinfilin, actin-binding protein, homolog 1 (Drosophila) | 0 | 1 | 0.994186 |
| BCL6     | B-cell leukemia/lymphoma 6                               | 0 | 1 | 0.98654  |
| CS       | citrate synthase                                         | 3 | 1 | 0.98654  |
| EBF2     | early B-cell factor 2                                    | 0 | 1 | 0.979006 |
| FGF14    | fibroblast growth factor 14                              | 4 | 1 | 0.971591 |
| UBA6     | ubiquitin-like modifier activating enzyme 6              | 1 | 1 | 0.964287 |
| TBR1     | T-box brain gene 1                                       | 0 | 1 | 0.95     |
| DAB2     | disabled homolog 2 (Drosophila)                          | 1 | 1 | 0.943015 |
| TMEM50B  | transmembrane protein 50B                                | 0 | 1 | 0.943015 |
| VAMP2    | vesicle-associated membrane protein 2                    | 3 | 1 | 0.943015 |
| ZFP36L1  | zinc finger protein 36, C3H type-like 1                  | 0 | 1 | 0.943015 |
| EIF4E    | eukaryotic translation initiation factor 4E              | 3 | 1 | 0.93613  |
| KANK4    | KN motif and ankyrin repeat domains 4                    | 0 | 1 | 0.93613  |
| LENG8    | leukocyte receptor cluster (LRC) member 8                | 0 | 1 | 0.929347 |
| GJA1     | gap junction protein, alpha 1                            | 2 | 1 | 0.916073 |
| SDC1     | syndecan 1                                               | 3 | 1 | 0.909574 |
| CBL      | Casitas B-lineage lymphoma                               | 9 | 1 | 0.903169 |
| GATA6    | GATA binding protein 6                                   | 0 | 1 | 0.903169 |
| ANKRD28  | ankyrin repeat domain 28                                 | 0 | 1 | 0.896855 |
| MAP3K3   | mitogen-activated protein kinase kinase kinase 3         | 3 | 1 | 0.896855 |
| SLC25A36 | solute carrier family 25, member 36                      | 0 | 1 | 0.890624 |
| DPYSL2   | dihydropyrimidinase-like 2                               | 1 | 1 | 0.878426 |
| FOSB     | FBJ osteosarcoma oncogene B                              | 0 | 1 | 0.872448 |
| ADD3     | adducin 3 (gamma)                                        | 0 | 1 | 0.854999 |
| GNPNAT1  | glucosamine-phosphate N-acetyltransferase 1              | 1 | 1 | 0.854999 |
| RAD21    | RAD21 homolog (S. pombe)                                 | 1 | 1 | 0.854999 |
| SERP1    | stress-associated endoplasmic reticulum protein 1        | 0 | 1 | 0.854999 |
| CREM     | cAMP responsive element modulator                        | 0 | 1 | 0.849338 |
| JARID2   | jumonji, AT rich interactive domain 2                    | 0 | 1 | 0.849338 |

|           |                                                                                                   |    |   |          |
|-----------|---------------------------------------------------------------------------------------------------|----|---|----------|
| MDFIC     | MyoD family inhibitor domain containing                                                           | 0  | 1 | 0.849338 |
| MAP3K12   | mitogen-activated protein kinase kinase kinase 12                                                 | 1  | 1 | 0.843751 |
| TIAM1     | T-cell lymphoma invasion and metastasis 1                                                         | 2  | 1 | 0.843751 |
| HOXA1     | homeobox A1                                                                                       | 0  | 1 | 0.838234 |
| TMEM55B   | transmembrane protein 55b                                                                         | 0  | 1 | 0.838234 |
| ATP6V1A   | ATPase, H <sup>+</sup> transporting, lysosomal V1 subunit A                                       | 4  | 1 | 0.832792 |
| FKBP5     | FK506 binding protein 5                                                                           | 0  | 1 | 0.832792 |
| SMARCC1   | SWI/SNF related, matrix associated, actin dependent regulator of chromatin, subfamily c, member 1 | 0  | 1 | 0.82742  |
| CDC42     | cell division cycle 42 homolog (S. cerevisiae)                                                    | 18 | 1 | 0.822114 |
| SPRED1    | sprouty protein with EVH-1 domain 1, related sequence                                             | 1  | 1 | 0.816879 |
| ZMYND11   | zinc finger, MYND domain containing 11                                                            | 0  | 1 | 0.811709 |
| CTTNBP2NL | CTTNBP2 N-terminal like                                                                           | 0  | 1 | 0.801562 |
| UTRN      | utrophin                                                                                          | 0  | 1 | 0.801562 |
| HIVEP2    | human immunodeficiency virus type I enhancer binding protein 2                                    | 0  | 1 | 0.796584 |
| GRB10     | growth factor receptor bound protein 10                                                           | 0  | 1 | 0.782012 |
| NCK2      | non-catalytic region of tyrosine kinase adaptor protein 2                                         | 3  | 1 | 0.777274 |
| RCAN2     | regulator of calcineurin 2                                                                        | 0  | 1 | 0.777274 |
| SMAD3     | MAD homolog 3 (Drosophila)                                                                        | 10 | 1 | 0.777274 |
| YES1      | Yamaguchi sarcoma viral (v-yes) oncogene homolog 1                                                | 2  | 1 | 0.777274 |
| YWHAZ     | tyrosine 3-monooxygenase/tryptophan 5-monooxygenase activation protein, zeta polypeptide          | 3  | 1 | 0.77259  |
| API5      | apoptosis inhibitor 5                                                                             | 0  | 1 | 0.763394 |
| LANCL1    | LanC (bacterial lantibiotic synthetase component C)-like 1                                        | 0  | 1 | 0.763394 |
| SFRP1     | secreted frizzled-related protein 1                                                               | 1  | 1 | 0.758875 |
| UST       | uronyl-2-sulfotransferase                                                                         | 1  | 1 | 0.754412 |
| IVNS1ABP  | influenza virus NS1A binding protein                                                              | 0  | 1 | 0.750001 |
| ZIC4      | zinc finger protein of the cerebellum 4                                                           | 0  | 1 | 0.745639 |
| CPLX2     | complexin 2                                                                                       | 0  | 1 | 0.741329 |
| RNGTT     | RNA guanylyltransferase and 5'-phosphatase                                                        | 0  | 1 | 0.732856 |
| UBN1      | ubiquitin 1                                                                                       | 0  | 1 | 0.732856 |
| VEGFA     | vascular endothelial growth factor A                                                              | 8  | 1 | 0.728693 |
| CFL2      | cofilin 2, muscle                                                                                 | 3  | 1 | 0.724577 |
| LASS6     | LAG1 homolog, ceramide synthase 6                                                                 | 0  | 1 | 0.724577 |
| LDLRAD3   | low density lipoprotein receptor class A domain containing 3                                      | 0  | 1 | 0.720505 |
| NFAT5     | nuclear factor of activated T-cells 5                                                             | 6  | 2 | 0.718488 |
| CAMK2G    | calcium/calmodulin-dependent protein kinase II gamma                                              | 11 | 1 | 0.708563 |
| TSPYL4    | TSPY-like 4                                                                                       | 0  | 1 | 0.708563 |
| MMD       | monocyte to macrophage differentiation-associated                                                 | 0  | 1 | 0.70467  |
| MYLK      | myosin, light polypeptide kinase                                                                  | 5  | 1 | 0.70467  |



|            |                                                                                        |    |   |          |
|------------|----------------------------------------------------------------------------------------|----|---|----------|
| PEA15A     | phosphoprotein enriched in astrocytes 15A                                              | 0  | 1 | 0.70467  |
| CLCN3      | chloride channel 3                                                                     | 0  | 1 | 0.70082  |
| MEF2A      | myocyte enhancer factor 2A                                                             | 0  | 1 | 0.70082  |
| MXD1       | MAX dimerization protein 1                                                             | 0  | 1 | 0.70082  |
| BCL7A      | B-cell CLL/lymphoma 7A                                                                 | 0  | 1 | 0.697012 |
| MTAP1A     | microtubule-associated protein 1 A                                                     | 0  | 1 | 0.697012 |
| RNF138     | ring finger protein 138                                                                | 0  | 1 | 0.697012 |
| SEC62      | SEC62 homolog (S. cerevisiae)                                                          | 2  | 1 | 0.697012 |
| TIMP3      | tissue inhibitor of metalloproteinase 3                                                | 0  | 1 | 0.697012 |
| D3BWG0562E | DNA segment, Chr 3, Brigham & Women's Genetics 0562 expressed                          | 0  | 1 | 0.689516 |
| CALM1      | calmodulin 1                                                                           | 15 | 1 | 0.68218  |
| CD2AP      | CD2-associated protein                                                                 | 1  | 1 | 0.68218  |
| AZIN1      | antizyme inhibitor 1                                                                   | 0  | 1 | 0.678572 |
| CTNND1     | catenin (cadherin associated protein), delta 1                                         | 2  | 1 | 0.678572 |
| MAP3K7     | mitogen-activated protein kinase kinase kinase 7                                       | 9  | 1 | 0.657692 |
| NUAK1      | NUAK family, SNF1-like kinase, 1                                                       | 0  | 1 | 0.657692 |
| ARHGAP24   | Rho GTPase activating protein 24                                                       | 0  | 1 | 0.654337 |
| CTDSPL     | CTD (carboxy-terminal domain, RNA polymerase II, polypeptide A) small phosphatase-like | 0  | 1 | 0.654337 |
| TPPP       | tubulin polymerization promoting protein                                               | 0  | 1 | 0.654337 |
| CLIC4      | chloride intracellular channel 4 (mitochondrial)                                       | 0  | 1 | 0.651015 |
| NCL        | nucleolin                                                                              | 0  | 1 | 0.651015 |
| SLC39A10   | solute carrier family 39 (zinc transporter), member 10                                 | 0  | 1 | 0.651015 |
| MNT        | max binding protein                                                                    | 0  | 1 | 0.647727 |
| THBS1      | thrombospondin 1                                                                       | 7  | 1 | 0.647727 |
| ZFP367     | zinc finger protein 367                                                                | 0  | 1 | 0.647727 |
| VEZF1      | vascular endothelial zinc finger 1                                                     | 0  | 1 | 0.644473 |
| ABR        | active BCR-related gene                                                                | 0  | 1 | 0.641249 |
| PTPN1      | protein tyrosine phosphatase, non-receptor type 1                                      | 2  | 1 | 0.641249 |
| ASH1L      | ash1 (absent, small, or homeotic)-like (Drosophila)                                    | 2  | 1 | 0.638059 |
| DACH1      | dachshund 1 (Drosophila)                                                               | 0  | 1 | 0.638059 |
| ACVR1B     | activin A receptor, type 1B                                                            | 1  | 1 | 0.634901 |
| G3BP2      | GTPase activating protein (SH3 domain) binding protein 2                               | 0  | 1 | 0.631773 |
| ANKIB1     | ankyrin repeat and IBR domain containing 1                                             | 0  | 1 | 0.628676 |
| ERLIN1     | ER lipid raft associated 1                                                             | 0  | 1 | 0.628676 |
| DAAM1      | dishevelled associated activator of morphogenesis 1                                    | 1  | 1 | 0.62561  |
| PAK3       | p21 protein (Cdc42/Rac)-activated kinase 3                                             | 6  | 1 | 0.622573 |
| MET        | met proto-oncogene                                                                     | 10 | 1 | 0.613637 |
| DDX17      | DEAD (Asp-Glu-Ala-Asp) box polypeptide 17                                              | 0  | 1 | 0.610714 |

|         |                                                                                 |    |   |          |
|---------|---------------------------------------------------------------------------------|----|---|----------|
| MMGT1   | membrane magnesium transporter 1                                                | 0  | 1 | 0.610714 |
| COL4A3  | collagen, type IV, alpha 3                                                      | 0  | 1 | 0.604953 |
| LIN7C   | lin-7 homolog C (C. elegans)                                                    | 0  | 1 | 0.604953 |
| SEMA6A  | sema domain, transmembrane domain (TM), and cytoplasmic domain, (semaphorin) 6A | 1  | 1 | 0.604953 |
| KLHL18  | kelch-like 18 (Drosophila)                                                      | 0  | 1 | 0.599299 |
| BSN     | bassoon                                                                         | 0  | 1 | 0.596512 |
| ACVR2A  | activin receptor IIA                                                            | 2  | 1 | 0.593749 |
| ARID2   | AT rich interactive domain 2 (ARID, RFX-like)                                   | 0  | 1 | 0.593749 |
| HS6ST2  | heparan sulfate 6-O-sulfotransferase 2                                          | 1  | 1 | 0.593749 |
| PTGFR   | prostaglandin F receptor                                                        | 2  | 1 | 0.593749 |
| RSBN1   | rosbin, round spermatid basic protein 1                                         | 0  | 1 | 0.591014 |
| ACSL4   | acyl-CoA synthetase long-chain family member 4                                  | 5  | 1 | 0.580317 |
| FOXO1   | forkhead box O1                                                                 | 3  | 1 | 0.580317 |
| ELAVL2  | ELAV (embryonic lethal, abnormal vision, Drosophila)-like 2 (Hu antigen B)      | 0  | 1 | 0.575112 |
| MBTD1   | mbt domain containing 1                                                         | 0  | 1 | 0.572545 |
| MBNL1   | muscleblind-like 1 (Drosophila)                                                 | 0  | 1 | 0.570001 |
| BAZ2B   | bromodomain adjacent to zinc finger domain, 2B                                  | 0  | 1 | 0.564978 |
| LAMC1   | laminin, gamma 1                                                                | 7  | 1 | 0.564978 |
| FNBP1L  | formin binding protein 1-like                                                   | 0  | 1 | 0.560043 |
| NDRG3   | N-myc downstream regulated gene 3                                               | 0  | 1 | 0.557609 |
| SYT1    | synaptotagmin I                                                                 | 0  | 1 | 0.557609 |
| RAB14   | RAB14, member RAS oncogene family                                               | 0  | 1 | 0.552801 |
| SLC7A2  | solute carrier family 7 (cationic amino acid transporter, y+ system), member 2  | 0  | 1 | 0.550429 |
| IGF1    | insulin-like growth factor 1                                                    | 13 | 1 | 0.548077 |
| ACAP2   | ArfGAP with coiled-coil, ankyrin repeat and PH domains 2                        | 1  | 1 | 0.54114  |
| WIPF2   | WAS/WASL interacting protein family, member 2                                   | 0  | 1 | 0.54114  |
| ANKFY1  | ankyrin repeat and FYVE domain containing 1                                     | 0  | 1 | 0.538865 |
| MAF     | avian musculoaponeurotic fibrosarcoma (v-maf) AS42 oncogene homolog             | 0  | 1 | 0.529959 |
| RAP2A   | RAS related protein 2a                                                          | 0  | 1 | 0.523469 |
| FOXP2   | forkhead box P2                                                                 | 0  | 1 | 0.521342 |
| RYBP    | RING1 and YY1 binding protein                                                   | 0  | 1 | 0.517137 |
| RNF38   | ring finger protein 38                                                          | 0  | 1 | 0.51506  |
| ESRRG   | estrogen-related receptor gamma                                                 | 0  | 1 | 0.510956 |
| FUBP1   | far upstream element (FUSE) binding protein 1                                   | 0  | 1 | 0.506917 |
| BCL2L11 | BCL2-like 11 (apoptosis facilitator)                                            | 0  | 1 | 0.500977 |
| NEGR1   | neuronal growth regulator 1                                                     | 1  | 1 | 0.499027 |
| SEMA6D  | sema domain, transmembrane domain (TM), and cytoplasmic domain, (semaphorin) 6D | 1  | 1 | 0.499027 |
| CDK14   | cyclin-dependent kinase 14                                                      | 0  | 1 | 0.497093 |

|          |                                                                   |    |   |          |
|----------|-------------------------------------------------------------------|----|---|----------|
| PAFAH1B1 | platelet-activating factor acetylhydrolase, isoform 1b, subunit 1 | 2  | 1 | 0.489504 |
| CAMK1D   | calcium/calmodulin-dependent protein kinase ID                    | 0  | 1 | 0.483962 |
| ETS1     | E26 avian leukemia oncogene 1, 5' domain                          | 2  | 1 | 0.482142 |
| FBXO28   | F-box protein 28                                                  | 0  | 1 | 0.482142 |
| FAM126A  | family with sequence similarity 126, member A                     | 0  | 1 | 0.480337 |
| MYO5A    | myosin VA                                                         | 0  | 1 | 0.480337 |
| RICTOR   | RPTOR independent companion of MTOR, complex 2                    | 1  | 1 | 0.475    |
| TGFB2    | transforming growth factor, beta receptor II                      | 10 | 1 | 0.473247 |
| PLAGL2   | pleiomorphic adenoma gene-like 2                                  | 0  | 1 | 0.461331 |
| FRS2     | fibroblast growth factor receptor substrate 2                     | 1  | 1 | 0.437713 |
| SOX11    | SRY-box containing gene 11                                        | 0  | 1 | 0.434746 |
| MTF1     | metal response element binding transcription factor 1             | 0  | 1 | 0.424669 |
| GABRB2   | gamma-aminobutyric acid (GABA) A receptor, subunit beta 2         | 1  | 1 | 0.409745 |
| ZFP148   | zinc finger protein 148                                           | 0  | 1 | 0.368534 |

**Supplemental Table S2B. TLR5.**

| TARGET_GENE | GENE_DESCRIPTION                                                                               | KEGG | OBSERVED_MIRNA | OE      |
|-------------|------------------------------------------------------------------------------------------------|------|----------------|---------|
| NRDG3       |                                                                                                | 0    | 1              | 512.999 |
| ALDOA       | aldolase A, fructose-bisphosphate                                                              | 4    | 1              | 21.375  |
| TRPV6       | transient receptor potential cation channel, subfamily V, member 6                             | 1    | 1              | 15.0882 |
| TMED3       | transmembrane emp24 domain containing 3                                                        | 0    | 1              | 14.25   |
| HFE2        | hemochromatosis type 2 (juvenile) (human homolog)                                              | 0    | 1              | 13.1538 |
| BRPF1       | bromodomain and PHD finger containing, 1                                                       | 0    | 1              | 10.4694 |
| SLC35A4     | solute carrier family 35, member A4                                                            | 0    | 1              | 9.1607  |
| GPX7        | glutathione peroxidase 7                                                                       | 2    | 1              | 8.6949  |
| MAF1        | MAF1 homolog (S. cerevisiae)                                                                   | 0    | 1              | 8.55    |
| CDC42BPB    | CDC42 binding protein kinase beta                                                              | 0    | 1              | 7.32858 |
| GIT1        | G protein-coupled receptor kinase-interactor 1                                                 | 2    | 1              | 6.03529 |
| NPEPPS      | aminopeptidase puromycin sensitive                                                             | 0    | 1              | 6.03529 |
| CD320       | CD320 antigen                                                                                  | 0    | 1              | 5.28865 |
| BCKDK       | branched chain ketoacid dehydrogenase kinase                                                   | 0    | 1              | 5.18183 |
| FUNDC2      | FUN14 domain containing 2                                                                      | 0    | 1              | 5.02942 |
| CCDC97      | coiled-coil domain containing 97                                                               | 0    | 1              | 4.70641 |
| P4HA1       | procollagen-proline, 2-oxoglutarate 4-dioxygenase (proline 4-hydroxylase), alpha 1 polypeptide | 2    | 1              | 4.58035 |
| OCLN        | occludin                                                                                       | 4    | 1              | 4.5     |
| ANKRD13C    | ankyrin repeat domain 13c                                                                      | 0    | 1              | 4.38462 |

|         |                                                          |   |   |         |
|---------|----------------------------------------------------------|---|---|---------|
| CS      | citrate synthase                                         | 3 | 1 | 3.94616 |
| TBR1    | T-box brain gene 1                                       | 0 | 1 | 3.8     |
| TMEM50B | transmembrane protein 50B                                | 0 | 1 | 3.77206 |
| RAD21   | RAD21 homolog (S. pombe)                                 | 1 | 1 | 3.42    |
| MAP3K12 | mitogen-activated protein kinase kinase kinase 12        | 1 | 1 | 3.375   |
| FKBP5   | FK506 binding protein 5                                  | 0 | 1 | 3.33117 |
| LASS6   | LAG1 homolog, ceramide synthase 6                        | 0 | 1 | 2.89831 |
| CLIC4   | chloride intracellular channel 4 (mitochondrial)         | 0 | 1 | 2.60406 |
| G3BP2   | GTPase activating protein (SH3 domain) binding protein 2 | 0 | 1 | 2.52709 |
| PAK3    | p21 protein (Cdc42/Rac)-activated kinase 3               | 6 | 1 | 2.49029 |
| MMGT1   | membrane magnesium transporter 1                         | 0 | 1 | 2.44286 |
| MBNL1   | muscleblind-like 1 (Drosophila)                          | 0 | 1 | 2.28    |
| LAMC1   | laminin, gamma 1                                         | 7 | 1 | 2.25991 |
| NDRG3   | N-myc downstream regulated gene 3                        | 0 | 1 | 2.23044 |
| ACAP2   | ArfGAP with coiled-coil, ankyrin repeat and PH domains 2 | 1 | 1 | 2.16456 |
| FOXP2   | forkhead box P2                                          | 0 | 1 | 2.08537 |
| NEGR1   | neuronal growth regulator 1                              | 1 | 1 | 1.99611 |
| NFAT5   | nuclear factor of activated T-cells 5                    | 6 | 1 | 1.43698 |

Supplemental Table S2C. TLR2.

| TARGET_GENE | GENE_DESCRIPTION                                                   | KEGG | OBSERVED_MIRNA | OE      |
|-------------|--------------------------------------------------------------------|------|----------------|---------|
| NRDG3       |                                                                    | 0    | 1              | 102.6   |
| HSPA1B      | heat shock protein 1B                                              | 6    | 1              | 12.825  |
| GJA3        | gap junction protein, alpha 3                                      | 0    | 1              | 10.26   |
| ALDOA       | aldolase A, fructose-bisphosphate                                  | 4    | 2              | 8.55    |
| ANXA2       | annexin A2                                                         | 0    | 1              | 5.40001 |
| ANP32B      | acidic (leucine-rich) nuclear phosphoprotein 32 family, member B   | 0    | 1              | 5.12999 |
| JUND        | Jun proto-oncogene related gene d                                  | 1    | 1              | 4.104   |
| SRSF9       | serine/arginine-rich splicing factor 9                             | 1    | 1              | 3.94615 |
| CDK9        | cyclin-dependent kinase 9 (CDC2-related kinase)                    | 0    | 1              | 3.8     |
| PHAX        | phosphorylated adaptor for RNA export                              | 1    | 1              | 3.42    |
| HSPD1       | heat shock protein 1 (chaperonin)                                  | 2    | 1              | 3.01765 |
| SNX15       | sorting nexin 15                                                   | 0    | 1              | 3.01765 |
| TRPV6       | transient receptor potential cation channel, subfamily V, member 6 | 1    | 1              | 3.01765 |
| DAZAP1      | DAZ associated protein 1                                           | 0    | 1              | 2.85    |
| HSP90B1     | heat shock protein 90, beta (Grp94), member 1                      | 4    | 1              | 2.85    |
| ODC1        | ornithine decarboxylase, structural 1                              | 3    | 1              | 2.85    |
| SMAP1       | stromal membrane-associated protein 1                              | 1    | 2              | 2.85    |

|          |                                                                                 |    |   |         |
|----------|---------------------------------------------------------------------------------|----|---|---------|
| TMED3    | transmembrane emp24 domain containing 3                                         | 0  | 1 | 2.85    |
| TMSB4X   | thymosin, beta 4, X chromosome                                                  | 1  | 1 | 2.85    |
| IRX5     | Iroquois related homeobox 5 (Drosophila)                                        | 0  | 1 | 2.77297 |
| SLC25A1  | solute carrier family 25 (mitochondrial carrier, citrate transporter), member 1 | 0  | 1 | 2.7     |
| HFE2     | hemochromatosis type 2 (juvenile) (human homolog)                               | 0  | 1 | 2.63077 |
| GIT1     | G protein-coupled receptor kinase-interactor 1                                  | 2  | 2 | 2.41412 |
| JAKMIP1  | janus kinase and microtubule interacting protein 1                              | 0  | 1 | 2.38605 |
| KTN1     | kinectin 1                                                                      | 0  | 1 | 2.38605 |
| DGKZ     | diacylglycerol kinase zeta                                                      | 4  | 1 | 2.28    |
| PLOD1    | procollagen-lysine, 2-oxoglutarate 5-dioxygenase 1                              | 1  | 1 | 2.28    |
| TRAPPC3  | trafficking protein particle complex 3                                          | 0  | 1 | 2.23044 |
| MAPK3    | mitogen-activated protein kinase 3                                              | 49 | 1 | 2.18298 |
| CALM2    | calmodulin 2                                                                    | 15 | 1 | 2.1375  |
| MTA2     | metastasis-associated gene family, member 2                                     | 0  | 1 | 2.1375  |
| BRPF1    | bromodomain and PHD finger containing, 1                                        | 0  | 1 | 2.09388 |
| RGS17    | regulator of G-protein signaling 17                                             | 0  | 1 | 2.09388 |
| RRBP1    | ribosome binding protein 1                                                      | 1  | 1 | 1.97307 |
| SNX2     | sorting nexin 2                                                                 | 0  | 1 | 1.97307 |
| HAND2    | heart and neural crest derivatives expressed transcript 2                       | 0  | 1 | 1.93585 |
| STC2     | stanniocalcin 2                                                                 | 0  | 1 | 1.93585 |
| STRN3    | striatin, calmodulin binding protein 3                                          | 0  | 1 | 1.86546 |
| PDGFA    | platelet derived growth factor, alpha                                           | 10 | 1 | 1.83214 |
| SLC35A4  | solute carrier family 35, member A4                                             | 0  | 1 | 1.83214 |
| GPX7     | glutathione peroxidase 7                                                        | 2  | 1 | 1.73898 |
| OSGIN2   | oxidative stress induced growth inhibitor family member 2                       | 0  | 1 | 1.73898 |
| MAF1     | MAF1 homolog (S. cerevisiae)                                                    | 0  | 1 | 1.71    |
| DHX15    | DEAH (Asp-Glu-Ala-His) box polypeptide 15                                       | 1  | 1 | 1.57846 |
| MAB21L1  | mab-21-like 1 (C. elegans)                                                      | 0  | 1 | 1.53135 |
| FXR2     | fragile X mental retardation, autosomal homolog 2                               | 0  | 1 | 1.50882 |
| HCN3     | hyperpolarization-activated, cyclic nucleotide-gated K+ 3                       | 0  | 1 | 1.50882 |
| HDAC4    | histone deacetylase 4                                                           | 0  | 1 | 1.50882 |
| NCOR2    | nuclear receptor co-repressor 2                                                 | 1  | 1 | 1.50882 |
| VAMP2    | vesicle-associated membrane protein 2                                           | 3  | 2 | 1.50882 |
| NONO     | non-POU-domain-containing, octamer binding protein                              | 0  | 1 | 1.48696 |
| CDC42BPB | CDC42 binding protein kinase beta                                               | 0  | 1 | 1.46572 |
| CNN3     | calponin 3, acidic                                                              | 0  | 1 | 1.46572 |
| LDHA     | lactate dehydrogenase A                                                         | 5  | 1 | 1.40548 |
| TBP      | TATA box binding protein                                                        | 2  | 1 | 1.38648 |

|         |                                                                      |    |   |         |
|---------|----------------------------------------------------------------------|----|---|---------|
| LEF1    | lymphoid enhancer binding factor 1                                   | 11 | 1 | 1.35    |
| PKP4    | plakophilin 4                                                        | 0  | 1 | 1.35    |
| SEC22B  | SEC22 vesicle trafficking protein homolog B ( <i>S. cerevisiae</i> ) | 2  | 1 | 1.35    |
| ACCN1   | amiloride-sensitive cation channel 1, neuronal (degenerin)           | 1  | 1 | 1.33247 |
| NUMBL   | numb-like                                                            | 1  | 1 | 1.33247 |
| TMEM178 | transmembrane protein 178                                            | 0  | 1 | 1.31538 |
| PNOC    | prepronociceptin                                                     | 0  | 1 | 1.29874 |
| SP2     | Sp2 transcription factor                                             | 0  | 1 | 1.29874 |
| AP3D1   | adaptor-related protein complex 3, delta 1 subunit                   | 1  | 1 | 1.2825  |
| NOTCH3  | Notch gene homolog 3 ( <i>Drosophila</i> )                           | 2  | 1 | 1.2825  |
| WNT1    | wingless-related MMTV integration site 1                             | 5  | 1 | 1.2825  |
| ARSJ    | arylsulfatase J                                                      | 0  | 1 | 1.25122 |
| B4GALT2 | UDP-Gal:betaGlcNAc beta 1,4- galactosyltransferase, polypeptide 2    | 5  | 1 | 1.25122 |
| RALGDS  | ral guanine nucleotide dissociation stimulator                       | 3  | 1 | 1.25122 |
| KIF2A   | kinesin family member 2A                                             | 0  | 1 | 1.20706 |
| NPEPPS  | aminopeptidase puromycin sensitive                                   | 0  | 1 | 1.20706 |
| KCNIP3  | Kv channel interacting protein 3, calsenilin                         | 0  | 1 | 1.19303 |
| CPLX2   | complexin 2                                                          | 0  | 2 | 1.18613 |
| TLK2    | tousled-like kinase 2 ( <i>Arabidopsis</i> )                         | 0  | 1 | 1.17931 |
| OTX2    | orthodenticle homolog 2 ( <i>Drosophila</i> )                        | 0  | 1 | 1.16591 |
| WDR1    | WD repeat domain 1                                                   | 0  | 1 | 1.16591 |
| E2F5    | E2F transcription factor 5                                           | 2  | 1 | 1.15281 |
| PEA15A  | phosphoprotein enriched in astrocytes 15A                            | 0  | 2 | 1.12747 |
| WASF1   | WASP family 1                                                        | 4  | 1 | 1.12747 |
| DBC1    | deleted in bladder cancer 1 (human)                                  | 0  | 1 | 1.11522 |
| EI24    | etoposide induced 2.4 mRNA                                           | 1  | 1 | 1.10322 |
| GPR85   | G protein-coupled receptor 85                                        | 0  | 1 | 1.10322 |
| CACNB3  | calcium channel, voltage-dependent, beta 3 subunit                   | 5  | 1 | 1.09149 |
| FUT8    | fucosyltransferase 8                                                 | 3  | 1 | 1.09149 |
| MATR3   | matrin 3                                                             | 0  | 1 | 1.09149 |
| BDNF    | brain derived neurotrophic factor                                    | 3  | 2 | 1.08    |
| SRPR    | signal recognition particle receptor ('docking protein')             | 1  | 1 | 1.08    |
| ANXA4   | annexin A4                                                           | 0  | 1 | 1.06875 |
| GTF2H1  | general transcription factor II H, polypeptide 1                     | 2  | 1 | 1.06875 |
| CD320   | CD320 antigen                                                        | 0  | 1 | 1.05773 |
| MPZ     | myelin protein zero                                                  | 1  | 1 | 1.04694 |
| TRA2B   | transformer 2 beta homolog ( <i>Drosophila</i> )                     | 1  | 1 | 1.04694 |
| BCKDK   | branched chain ketoacid dehydrogenase kinase                         | 0  | 1 | 1.03637 |

|          |                                                                                                                  |    |   |          |
|----------|------------------------------------------------------------------------------------------------------------------|----|---|----------|
| HMGN1    | high mobility group nucleosomal binding domain 1                                                                 | 0  | 1 | 1.03637  |
| POLDIP3  | polymerase (DNA-directed), delta interacting protein 3                                                           | 0  | 1 | 1.03637  |
| RBM14    | RNA binding motif protein 14                                                                                     | 0  | 1 | 1.03637  |
| MED1     | mediator complex subunit 1                                                                                       | 0  | 2 | 1.03116  |
| ZCCHC17  | zinc finger, CCHC domain containing 17                                                                           | 0  | 1 | 1.026    |
| TAF5     | TAF5 RNA polymerase II, TATA box binding protein (TBP)-associated factor                                         | 1  | 1 | 1.01584  |
| CAP1     | CAP, adenylate cyclase-associated protein 1 (yeast)                                                              | 0  | 1 | 1.00588  |
| FUNDC2   | FUN14 domain containing 2                                                                                        | 0  | 1 | 1.00588  |
| PPP1R10  | protein phosphatase 1, regulatory subunit 10                                                                     | 0  | 1 | 1.00588  |
| DAAM1    | dishevelled associated activator of morphogenesis 1                                                              | 1  | 2 | 1.00098  |
| HIAT1    | hippocampus abundant gene transcript 1                                                                           | 0  | 1 | 0.986539 |
| MET      | met proto-oncogene                                                                                               | 10 | 2 | 0.981819 |
| SGSM2    | small G protein signaling modulator 2                                                                            | 0  | 1 | 0.977145 |
| DDX17    | DEAD (Asp-Glu-Ala-Asp) box polypeptide 17                                                                        | 0  | 2 | 0.977142 |
| PDCD10   | programmed cell death 10                                                                                         | 0  | 1 | 0.967923 |
| ARCN1    | archain 1                                                                                                        | 0  | 1 | 0.950001 |
| CNTNAP1  | contactin associated protein-like 1                                                                              | 1  | 1 | 0.950001 |
| GALNT1   | UDP-N-acetyl-alpha-D-galactosamine:polypeptide N-acetylgalactosaminyltransferase 1                               | 2  | 1 | 0.950001 |
| HNRNPK   | heterogeneous nuclear ribonucleoprotein K                                                                        | 1  | 1 | 0.950001 |
| PICALM   | phosphatidylinositol binding clathrin assembly protein                                                           | 0  | 1 | 0.950001 |
| CCDC97   | coiled-coil domain containing 97                                                                                 | 0  | 1 | 0.941283 |
| GLIS2    | GLIS family zinc finger 2                                                                                        | 0  | 1 | 0.932727 |
| SDHC     | succinate dehydrogenase complex, subunit C, integral membrane protein                                            | 6  | 1 | 0.932727 |
| ATP6V1B2 | ATPase, H <sup>+</sup> transporting, lysosomal V1 subunit B2                                                     | 4  | 1 | 0.924325 |
| TCFAP2C  | transcription factor AP-2, gamma                                                                                 | 0  | 1 | 0.924325 |
| ARHGAP1  | Rho GTPase activating protein 1                                                                                  | 0  | 1 | 0.91607  |
| MAP2K1   | mitogen-activated protein kinase kinase 1                                                                        | 37 | 1 | 0.91607  |
| P4HA1    | procollagen-proline, 2-oxoglutarate 4-dioxygenase (proline 4-hydroxylase), alpha 1 polypeptide                   | 2  | 1 | 0.91607  |
| SEMA4C   | sema domain, immunoglobulin domain (Ig), transmembrane domain (TM) and short cytoplasmic domain, (semaphorin) 4C | 1  | 1 | 0.91607  |
| AXL      | AXL receptor tyrosine kinase                                                                                     | 0  | 1 | 0.907964 |
| CNNM4    | cyclin M4                                                                                                        | 0  | 1 | 0.907964 |
| PTPLAD1  | protein tyrosine phosphatase-like A domain containing 1                                                          | 0  | 1 | 0.907964 |
| GRK6     | G protein-coupled receptor kinase 6                                                                              | 2  | 1 | 0.900001 |
| OCLN     | occludin                                                                                                         | 4  | 1 | 0.900001 |
| PHC2     | polyhomeotic-like 2 (Drosophila)                                                                                 | 0  | 1 | 0.900001 |

|          |                                                                                |   |   |          |
|----------|--------------------------------------------------------------------------------|---|---|----------|
| SYT1     | synaptotagmin I                                                                | 0 | 2 | 0.892174 |
| SLC27A4  | solute carrier family 27 (fatty acid transporter), member 4                    | 1 | 1 | 0.884482 |
| ANKRD13C | ankyrin repeat domain 13c                                                      | 0 | 1 | 0.876924 |
| CLTC     | clathrin, heavy polypeptide (Hc)                                               | 4 | 1 | 0.876924 |
| SLC25A25 | solute carrier family 25 (mitochondrial carrier, phosphate carrier), member 25 | 0 | 1 | 0.869493 |
| SNAP25   | synaptosomal-associated protein 25                                             | 1 | 1 | 0.869493 |
| SRSF3    | serine/arginine-rich splicing factor 3                                         | 1 | 1 | 0.869493 |
| SRSF1    | serine/arginine-rich splicing factor 1                                         | 1 | 2 | 0.865823 |
| ACTR1A   | ARP1 actin-related protein 1 homolog A, centractin alpha (yeast)               | 0 | 1 | 0.862184 |
| KDM2B    | lysine (K)-specific demethylase 2B                                             | 0 | 1 | 0.862184 |
| CCNE2    | cyclin E2                                                                      | 6 | 1 | 0.840983 |
| EDN1     | endothelin 1                                                                   | 4 | 1 | 0.840983 |
| ACSL1    | acyl-CoA synthetase long-chain family member 1                                 | 5 | 1 | 0.834147 |
| EIF2C4   | eukaryotic translation initiation factor 2C, 4                                 | 0 | 1 | 0.834147 |
| FIGN     | fidgetin                                                                       | 0 | 1 | 0.834147 |
| SERPINE1 | serine (or cysteine) peptidase inhibitor, clade E, member 1                    | 3 | 1 | 0.834147 |
| SULF1    | sulfatase 1                                                                    | 0 | 1 | 0.827421 |
| TNPO2    | transportin 2 (importin 3, karyopherin beta 2b)                                | 0 | 1 | 0.827421 |
| UBP1     | upstream binding protein 1                                                     | 0 | 1 | 0.827421 |
| CTNNBIP1 | catenin beta interacting protein 1                                             | 1 | 1 | 0.820799 |
| KLF11    | Kruppel-like factor 11                                                         | 0 | 1 | 0.820799 |
| ADAR     | adenosine deaminase, RNA-specific                                              | 1 | 1 | 0.814286 |
| CPEB1    | cytoplasmic polyadenylation element binding protein 1                          | 3 | 1 | 0.807875 |
| GAS2L1   | growth arrest-specific 2 like 1                                                | 0 | 1 | 0.807875 |
| RIT2     | Ras-like without CAAX 2                                                        | 0 | 1 | 0.807875 |
| GPR64    | G protein-coupled receptor 64                                                  | 0 | 1 | 0.801561 |
| CYTH1    | cytohesin 1                                                                    | 0 | 1 | 0.795349 |
| TWF1     | twinfilin, actin-binding protein, homolog 1 (Drosophila)                       | 0 | 1 | 0.795349 |
| BCL6     | B-cell leukemia/lymphoma 6                                                     | 0 | 1 | 0.789232 |
| CS       | citrate synthase                                                               | 3 | 1 | 0.789232 |
| ELMOD1   | ELMO domain containing 1                                                       | 0 | 1 | 0.789232 |
| NOTCH1   | Notch gene homolog 1 (Drosophila)                                              | 3 | 1 | 0.789232 |
| EBF2     | early B-cell factor 2                                                          | 0 | 1 | 0.783205 |
| FGF14    | fibroblast growth factor 14                                                    | 4 | 1 | 0.777273 |
| GRM7     | glutamate receptor, metabotropic 7                                             | 1 | 1 | 0.777273 |
| MYO1C    | myosin IC                                                                      | 0 | 1 | 0.76567  |
| TBR1     | T-box brain gene 1                                                             | 0 | 1 | 0.76     |
| TMEM50B  | transmembrane protein 50B                                                      | 0 | 1 | 0.754412 |



|           |                                                                                                   |    |   |          |
|-----------|---------------------------------------------------------------------------------------------------|----|---|----------|
| ZFP36L1   | zinc finger protein 36, C3H type-like 1                                                           | 0  | 1 | 0.754412 |
| EIF4E     | eukaryotic translation initiation factor 4E                                                       | 3  | 1 | 0.748904 |
| KANK4     | KN motif and ankyrin repeat domains 4                                                             | 0  | 1 | 0.748904 |
| LGR4      | leucine-rich repeat-containing G protein-coupled receptor 4                                       | 1  | 1 | 0.748904 |
| TMEM55A   | transmembrane protein 55A                                                                         | 0  | 1 | 0.73813  |
| GJA1      | gap junction protein, alpha 1                                                                     | 2  | 1 | 0.732858 |
| JAG1      | jagged 1                                                                                          | 1  | 1 | 0.727659 |
| PROSAP1P1 | ProSAPiP1 protein                                                                                 | 0  | 1 | 0.727659 |
| SDC1      | syndecan 1                                                                                        | 3  | 1 | 0.727659 |
| CBL       | Casitas B-lineage lymphoma                                                                        | 9  | 1 | 0.722536 |
| GATA6     | GATA binding protein 6                                                                            | 0  | 1 | 0.722536 |
| RIC8B     | resistance to inhibitors of cholinesterase 8 homolog B (C. elegans)                               | 0  | 1 | 0.722536 |
| ZDHHC17   | zinc finger, DHHC domain containing 17                                                            | 0  | 1 | 0.722536 |
| METAP1    | methionyl aminopeptidase 1                                                                        | 0  | 1 | 0.717484 |
| MYRIP     | myosin VIIA and Rab interacting protein                                                           | 0  | 1 | 0.717484 |
| ACBD3     | acyl-Coenzyme A binding domain containing 3                                                       | 0  | 1 | 0.702741 |
| FOSB      | FBJ osteosarcoma oncogene B                                                                       | 0  | 1 | 0.697958 |
| TRIM2     | tripartite motif-containing 2                                                                     | 0  | 2 | 0.68859  |
| GNPNAT1   | glucosamine-phosphate N-acetyltransferase 1                                                       | 1  | 1 | 0.683999 |
| RAD21     | RAD21 homolog (S. pombe)                                                                          | 1  | 1 | 0.683999 |
| SERP1     | stress-associated endoplasmic reticulum protein 1                                                 | 0  | 1 | 0.683999 |
| VCL       | vinculin                                                                                          | 6  | 1 | 0.683999 |
| CNTNAP2   | contactin associated protein-like 2                                                               | 1  | 1 | 0.67947  |
| CREM      | cAMP responsive element modulator                                                                 | 0  | 1 | 0.67947  |
| JARID2    | jumonji, AT rich interactive domain 2                                                             | 0  | 1 | 0.67947  |
| MAP3K12   | mitogen-activated protein kinase kinase kinase 12                                                 | 1  | 1 | 0.675001 |
| TIAM1     | T-cell lymphoma invasion and metastasis 1                                                         | 2  | 1 | 0.675001 |
| GALNT7    | UDP-N-acetyl-alpha-D-galactosamine: polypeptide N-acetylgalactosaminyltransferase 7               | 2  | 1 | 0.670587 |
| HOXA1     | homeobox A1                                                                                       | 0  | 1 | 0.670587 |
| RRAGC     | Ras-related GTP binding C                                                                         | 0  | 1 | 0.670587 |
| TMEM55B   | transmembrane protein 55b                                                                         | 0  | 1 | 0.670587 |
| ATP6V1A   | ATPase, H <sup>+</sup> transporting, lysosomal V1 subunit A                                       | 4  | 1 | 0.666234 |
| FKBP5     | FK506 binding protein 5                                                                           | 0  | 1 | 0.666234 |
| GOLPH3L   | golgi phosphoprotein 3-like                                                                       | 0  | 1 | 0.661936 |
| SMARCC1   | SWI/SNF related, matrix associated, actin dependent regulator of chromatin, subfamily c, member 1 | 0  | 1 | 0.661936 |
| CDC42     | cell division cycle 42 homolog (S. cerevisiae)                                                    | 18 | 1 | 0.657691 |

|           |                                                                                          |    |   |          |
|-----------|------------------------------------------------------------------------------------------|----|---|----------|
| PPP2R3A   | protein phosphatase 2, regulatory subunit B", alpha                                      | 0  | 1 | 0.657691 |
| SEMA4F    | sema domain, immunoglobulin domain (Ig), TM domain, and short cytoplasmic domain         | 1  | 1 | 0.657691 |
| BTBD11    | BTB (POZ) domain containing 11                                                           | 0  | 1 | 0.653503 |
| SPRED1    | sprouty protein with EVH-1 domain 1, related sequence                                    | 1  | 1 | 0.653503 |
| CITED2    | Cbp/p300-interacting transactivator, with Glu/Asp-rich carboxy-terminal domain, 2        | 0  | 1 | 0.649368 |
| ZMYND11   | zinc finger, MYND domain containing 11                                                   | 0  | 1 | 0.649368 |
| CTTNBP2NL | CTTNBP2 N-terminal like                                                                  | 0  | 1 | 0.64125  |
| UTRN      | utrophin                                                                                 | 0  | 1 | 0.64125  |
| HIVEP2    | human immunodeficiency virus type I enhancer binding protein 2                           | 0  | 1 | 0.637267 |
| SAR1A     | SAR1 gene homolog A (S. cerevisiae)                                                      | 1  | 1 | 0.633334 |
| BRPF3     | bromodomain and PHD finger containing, 3                                                 | 0  | 1 | 0.621819 |
| CALCR     | calcitonin receptor                                                                      | 1  | 1 | 0.621819 |
| NCK2      | non-catalytic region of tyrosine kinase adaptor protein 2                                | 3  | 1 | 0.621819 |
| RCAN2     | regulator of calcineurin 2                                                               | 0  | 1 | 0.621819 |
| YWHAZ     | tyrosine 3-monooxygenase/tryptophan 5-monooxygenase activation protein, zeta polypeptide | 3  | 1 | 0.618072 |
| API5      | apoptosis inhibitor 5                                                                    | 0  | 1 | 0.610715 |
| LANCL1    | LanC (bacterial lantibiotic synthetase component C)-like 1                               | 0  | 1 | 0.610715 |
| SFRP1     | secreted frizzled-related protein 1                                                      | 1  | 1 | 0.6071   |
| RAB43     | RAB43, member RAS oncogene family                                                        | 0  | 1 | 0.603529 |
| UST       | uronyl-2-sulfotransferase                                                                | 1  | 1 | 0.603529 |
| FZD7      | frizzled homolog 7 (Drosophila)                                                          | 4  | 1 | 0.600001 |
| MPP2      | membrane protein, palmitoylated 2 (MAGUK p55 subfamily member 2)                         | 0  | 1 | 0.600001 |
| FAM70A    | family with sequence similarity 70, member A                                             | 0  | 1 | 0.596511 |
| FNDC3A    | fibronectin type III domain containing 3A                                                | 0  | 1 | 0.596511 |
| PPP1R16B  | protein phosphatase 1, regulatory (inhibitor) subunit 16B                                | 0  | 1 | 0.596511 |
| ZIC4      | zinc finger protein of the cerebellum 4                                                  | 0  | 1 | 0.596511 |
| RNGTT     | RNA guanylyltransferase and 5'-phosphatase                                               | 0  | 1 | 0.586285 |
| UBN1      | ubiquitin 1                                                                              | 0  | 1 | 0.586285 |
| VEGFA     | vascular endothelial growth factor A                                                     | 8  | 1 | 0.582954 |
| LASS6     | LAG1 homolog, ceramide synthase 6                                                        | 0  | 1 | 0.579661 |
| NFAT5     | nuclear factor of activated T-cells 5                                                    | 6  | 2 | 0.57479  |
| CAPRIN1   | cell cycle associated protein 1                                                          | 0  | 1 | 0.573184 |
| CAMK2G    | calcium/calmodulin-dependent protein kinase II gamma                                     | 11 | 1 | 0.56685  |
| TSPYL4    | TSPY-like 4                                                                              | 0  | 1 | 0.56685  |
| MMD       | monocyte to macrophage differentiation-associated                                        | 0  | 1 | 0.563736 |
| MYH9      | myosin, heavy polypeptide 9, non-muscle                                                  | 3  | 1 | 0.563736 |

|            |                                                                                        |    |   |          |
|------------|----------------------------------------------------------------------------------------|----|---|----------|
| MYLK       | myosin, light polypeptide kinase                                                       | 5  | 1 | 0.563736 |
| CLCN3      | chloride channel 3                                                                     | 0  | 1 | 0.560656 |
| MEF2A      | myocyte enhancer factor 2A                                                             | 0  | 1 | 0.560656 |
| MXD1       | MAX dimerization protein 1                                                             | 0  | 1 | 0.560656 |
| BCL7A      | B-cell CLL/lymphoma 7A                                                                 | 0  | 1 | 0.557609 |
| MTAP1A     | microtubule-associated protein 1 A                                                     | 0  | 1 | 0.557609 |
| RNF138     | ring finger protein 138                                                                | 0  | 1 | 0.557609 |
| SEC62      | SEC62 homolog (S. cerevisiae)                                                          | 2  | 1 | 0.557609 |
| TIMP3      | tissue inhibitor of metalloproteinase 3                                                | 0  | 1 | 0.557609 |
| USP46      | ubiquitin specific peptidase 46                                                        | 0  | 1 | 0.557609 |
| FOXJ2      | forkhead box J2                                                                        | 0  | 1 | 0.554594 |
| D3BWG0562E | DNA segment, Chr 3, Brigham & Women's Genetics 0562 expressed                          | 0  | 1 | 0.551613 |
| CALM1      | calmodulin 1                                                                           | 15 | 1 | 0.545744 |
| CD2AP      | CD2-associated protein                                                                 | 1  | 1 | 0.545744 |
| AZIN1      | antizyme inhibitor 1                                                                   | 0  | 1 | 0.542857 |
| ITCH       | itchy, E3 ubiquitin protein ligase                                                     | 2  | 1 | 0.542857 |
| NRIP3      | nuclear receptor interacting protein 3                                                 | 0  | 1 | 0.542857 |
| MAP3K7     | mitogen-activated protein kinase kinase kinase 7                                       | 9  | 1 | 0.526154 |
| CTDSPL     | CTD (carboxy-terminal domain, RNA polymerase II, polypeptide A) small phosphatase-like | 0  | 1 | 0.52347  |
| NAV1       | neuron navigator 1                                                                     | 0  | 1 | 0.52347  |
| TPPP       | tubulin polymerization promoting protein                                               | 0  | 1 | 0.52347  |
| VAT1       | vesicle amine transport protein 1 homolog (T californica)                              | 0  | 1 | 0.52347  |
| CLIC4      | chloride intracellular channel 4 (mitochondrial)                                       | 0  | 1 | 0.520812 |
| NCL        | nucleolin                                                                              | 0  | 1 | 0.520812 |
| SLC39A10   | solute carrier family 39 (zinc transporter), member 10                                 | 0  | 1 | 0.520812 |
| MNT        | max binding protein                                                                    | 0  | 1 | 0.518182 |
| THBS1      | thrombospondin 1                                                                       | 7  | 1 | 0.518182 |
| ZFP367     | zinc finger protein 367                                                                | 0  | 1 | 0.518182 |
| VEZF1      | vascular endothelial zinc finger 1                                                     | 0  | 1 | 0.515578 |
| ABR        | active BCR-related gene                                                                | 0  | 1 | 0.512999 |
| PTPN1      | protein tyrosine phosphatase, non-receptor type 1                                      | 2  | 1 | 0.512999 |
| ASH1L      | ash1 (absent, small, or homeotic)-like (Drosophila)                                    | 2  | 1 | 0.510448 |
| G3BP2      | GTPase activating protein (SH3 domain) binding protein 2                               | 0  | 1 | 0.505418 |
| ANKIB1     | ankyrin repeat and IBR domain containing 1                                             | 0  | 1 | 0.502941 |
| CNTN2      | contactin 2                                                                            | 1  | 1 | 0.502941 |
| BAZ2A      | bromodomain adjacent to zinc finger domain, 2A                                         | 0  | 1 | 0.500488 |
| PAK3       | p21 protein (Cdc42/Rac)-activated kinase 3                                             | 6  | 1 | 0.498059 |

|          |                                                                                |    |   |          |
|----------|--------------------------------------------------------------------------------|----|---|----------|
| GPR158   | G protein-coupled receptor 158                                                 | 0  | 1 | 0.495652 |
| MMGT1    | membrane magnesium transporter 1                                               | 0  | 1 | 0.488571 |
| COL4A3   | collagen, type IV, alpha 3                                                     | 0  | 1 | 0.483963 |
| LIN7C    | lin-7 homolog C (C. elegans)                                                   | 0  | 1 | 0.483963 |
| BSN      | bassoon                                                                        | 0  | 1 | 0.47721  |
| AKAP6    | A kinase (PRKA) anchor protein 6                                               | 0  | 1 | 0.475    |
| ARID2    | AT rich interactive domain 2 (ARID, RFX-like)                                  | 0  | 1 | 0.475    |
| HS6ST2   | heparan sulfate 6-O-sulfotransferase 2                                         | 1  | 1 | 0.475    |
| ARHGAP26 | Rho GTPase activating protein 26                                               | 0  | 1 | 0.472811 |
| NDST1    | N-deacetylase/N-sulfotransferase (heparan glucosaminyl) 1                      | 2  | 1 | 0.472811 |
| RSBN1    | rosbin, round spermatid basic protein 1                                        | 0  | 1 | 0.472811 |
| ACSL4    | acyl-CoA synthetase long-chain family member 4                                 | 5  | 1 | 0.464254 |
| FBXO41   | F-box protein 41                                                               | 0  | 1 | 0.462162 |
| HTR2C    | 5-hydroxytryptamine (serotonin) receptor 2C                                    | 3  | 1 | 0.462162 |
| ELAVL2   | ELAV (embryonic lethal, abnormal vision, Drosophila)-like 2 (Hu antigen B)     | 0  | 1 | 0.46009  |
| ANKRD52  | ankyrin repeat domain 52                                                       | 0  | 1 | 0.458036 |
| PDGFRA   | platelet derived growth factor receptor, alpha polypeptide                     | 11 | 1 | 0.458036 |
| MBNL1    | muscleblind-like 1 (Drosophila)                                                | 0  | 1 | 0.456001 |
| BAZ2B    | bromodomain adjacent to zinc finger domain, 2B                                 | 0  | 1 | 0.451982 |
| LAMC1    | laminin, gamma 1                                                               | 7  | 1 | 0.451982 |
| ZFXH4    | zinc finger homeodomain 4                                                      | 0  | 1 | 0.45     |
| FNBP1L   | formin binding protein 1-like                                                  | 0  | 1 | 0.448035 |
| NAA50    | N(alpha)-acetyltransferase 50, NatE catalytic subunit                          | 0  | 1 | 0.448035 |
| SCN2B    | sodium channel, voltage-gated, type II, beta                                   | 0  | 1 | 0.448035 |
| NDRG3    | N-myc downstream regulated gene 3                                              | 0  | 1 | 0.446087 |
| PHF15    | PHD finger protein 15                                                          | 0  | 1 | 0.442241 |
| GMFB     | glia maturation factor, beta                                                   | 0  | 1 | 0.440343 |
| SLC7A2   | solute carrier family 7 (cationic amino acid transporter, y+ system), member 2 | 0  | 1 | 0.440343 |
| TMCC3    | transmembrane and coiled coil domains 3                                        | 0  | 1 | 0.440343 |
| IGF1     | insulin-like growth factor 1                                                   | 13 | 1 | 0.438462 |
| HIC2     | hypermethylated in cancer 2                                                    | 0  | 1 | 0.434746 |
| ACAP2    | ArfGAP with coiled-coil, ankyrin repeat and PH domains 2                       | 1  | 1 | 0.432912 |
| FRMPD4   | FERM and PDZ domain containing 4                                               | 0  | 1 | 0.432912 |
| WIPF2    | WAS/WASL interacting protein family, member 2                                  | 0  | 1 | 0.432912 |
| ANKFY1   | ankyrin repeat and FYVE domain containing 1                                    | 0  | 1 | 0.431092 |
| ASB1     | ankyrin repeat and SOCS box-containing 1                                       | 0  | 1 | 0.420491 |
| PKIA     | protein kinase inhibitor, alpha                                                | 0  | 1 | 0.420491 |
| RAP2A    | RAS related protein 2a                                                         | 0  | 1 | 0.418775 |

|          |                                                                                                |   |   |          |
|----------|------------------------------------------------------------------------------------------------|---|---|----------|
| FOXP2    | forkhead box P2                                                                                | 0 | 1 | 0.417073 |
| DCAF7    | DDB1 and CUL4 associated factor 7                                                              | 0 | 1 | 0.415385 |
| RYBP     | RING1 and YY1 binding protein                                                                  | 0 | 1 | 0.413709 |
| RNF38    | ring finger protein 38                                                                         | 0 | 1 | 0.412048 |
| ESRRG    | estrogen-related receptor gamma                                                                | 0 | 1 | 0.408765 |
| FUBP1    | far upstream element (FUSE) binding protein 1                                                  | 0 | 1 | 0.405534 |
| BCL2L11  | BCL2-like 11 (apoptosis facilitator)                                                           | 0 | 1 | 0.400782 |
| FNDC3B   | fibronectin type III domain containing 3B                                                      | 0 | 1 | 0.400782 |
| NEGR1    | neuronal growth regulator 1                                                                    | 1 | 1 | 0.399222 |
| SEMA6D   | sema domain, transmembrane domain (TM), and cytoplasmic domain, (semaphorin) 6D                | 1 | 1 | 0.399222 |
| CDK14    | cyclin-dependent kinase 14                                                                     | 0 | 1 | 0.397674 |
| PAFAH1B1 | platelet-activating factor acetylhydrolase, isoform 1b, subunit 1                              | 2 | 1 | 0.391603 |
| ETS1     | E26 avian leukemia oncogene 1, 5' domain                                                       | 2 | 1 | 0.385714 |
| RICTOR   | RPTOR independent companion of MTOR, complex 2                                                 | 1 | 1 | 0.38     |
| CACNA1E  | calcium channel, voltage-dependent, R type, alpha 1E subunit                                   | 3 | 1 | 0.375824 |
| MLLT3    | myeloid/lymphoid or mixed-lineage leukemia (trithorax homolog, Drosophila); translocated to, 3 | 0 | 1 | 0.361268 |
| FRS2     | fibroblast growth factor receptor substrate 2                                                  | 1 | 1 | 0.350171 |
| CLOCK    | circadian locomotor output cycles kaput                                                        | 1 | 1 | 0.344295 |
| MTF1     | metal response element binding transcription factor 1                                          | 0 | 1 | 0.339735 |
| CAMTA1   | calmodulin binding transcription activator 1                                                   | 0 | 1 | 0.3375   |
| FRMD4A   | FERM domain containing 4A                                                                      | 0 | 1 | 0.3375   |
| GABRB2   | gamma-aminobutyric acid (GABA) A receptor, subunit beta 2                                      | 1 | 1 | 0.327796 |
| DCX      | doublecortin                                                                                   | 0 | 1 | 0.295677 |
| TBL1XR1  | transducin (beta)-like 1X-linked receptor 1                                                    | 1 | 1 | 0.294827 |
| ZFP148   | zinc finger protein 148                                                                        | 0 | 1 | 0.294827 |
| ITSN1    | intersectin 1 (SH3 domain protein 1A)                                                          | 0 | 1 | 0.278049 |
| TNRC6B   | trinucleotide repeat containing 6b                                                             | 0 | 1 | 0.252709 |

**Supplemental Table S2D. TLR4.**

| TARGET_GENE | GENE_DESCRIPTION                             | KEGG | OBSERVED_MIRNA | OE      |
|-------------|----------------------------------------------|------|----------------|---------|
| NRDG3       |                                              | 0    | 1              | 102.6   |
| MYH4        | myosin, heavy polypeptide 4, skeletal muscle | 2    | 1              | 14.6572 |
| ALDOA       | aldolase A, fructose-bisphosphate            | 4    | 2              | 8.55    |

|          |                                                                                 |    |   |         |
|----------|---------------------------------------------------------------------------------|----|---|---------|
| SNX15    | sorting nexin 15                                                                | 0  | 2 | 6.03529 |
| MYH1     | myosin, heavy polypeptide 1, skeletal muscle, adult                             | 2  | 1 | 4.88571 |
| CACNA2D3 | calcium channel, voltage-dependent, alpha2/delta subunit 3                      | 5  | 1 | 4.66364 |
| ZFP579   | zinc finger protein 579                                                         | 0  | 1 | 4.46087 |
| RTKN     | rhotekin                                                                        | 0  | 1 | 3.94615 |
| CCK      | cholecystokinin                                                                 | 2  | 1 | 3.66429 |
| ATP6V1E1 | ATPase, H+ transporting, lysosomal V1 subunit E1                                | 4  | 1 | 3.53793 |
| VTI1B    | vesicle transport through interaction with t-SNAREs 1B homolog                  | 1  | 1 | 3.42    |
| ZFP423   | zinc finger protein 423                                                         | 0  | 2 | 3.36395 |
| TRPV6    | transient receptor potential cation channel, subfamily V, member 6              | 1  | 1 | 3.01765 |
| AUH      | AU RNA binding protein/enoyl-coenzyme A hydratase                               | 2  | 1 | 2.93143 |
| DAZAP1   | DAZ associated protein 1                                                        | 0  | 1 | 2.85    |
| HSP90B1  | heat shock protein 90, beta (Grp94), member 1                                   | 4  | 1 | 2.85    |
| NEFL     | neurofilament, light polypeptide                                                | 1  | 1 | 2.85    |
| TMED3    | transmembrane emp24 domain containing 3                                         | 0  | 1 | 2.85    |
| PKP4     | plakophilin 4                                                                   | 0  | 2 | 2.7     |
| SLC25A1  | solute carrier family 25 (mitochondrial carrier, citrate transporter), member 1 | 0  | 1 | 2.7     |
| HFE2     | hemochromatosis type 2 (juvenile) (human homolog)                               | 0  | 1 | 2.63077 |
| ACTB     | actin, beta                                                                     | 12 | 1 | 2.50244 |
| JAKMIP1  | janus kinase and microtubule interacting protein 1                              | 0  | 1 | 2.38605 |
| DGKZ     | diacylglycerol kinase zeta                                                      | 4  | 1 | 2.28    |
| PLOD1    | procollagen-lysine, 2-oxoglutarate 5-dioxygenase 1                              | 1  | 1 | 2.28    |
| ATXN2    | ataxin 2                                                                        | 0  | 1 | 2.1375  |
| MTA2     | metastasis-associated gene family, member 2                                     | 0  | 1 | 2.1375  |
| NRGN     | neurogranin                                                                     | 0  | 1 | 2.1375  |
| BRPF1    | bromodomain and PHD finger containing, 1                                        | 0  | 1 | 2.09388 |
| RGS17    | regulator of G-protein signaling 17                                             | 0  | 1 | 2.09388 |
| PTK2B    | PTK2 protein tyrosine kinase 2 beta                                             | 5  | 1 | 2.052   |
| SPATS2   | spermatogenesis associated, serine-rich 2                                       | 0  | 1 | 2.052   |
| CACHD1   | cache domain containing 1                                                       | 0  | 1 | 1.93585 |
| TGIF1    | TGFB-induced factor homeobox 1                                                  | 0  | 1 | 1.9     |
| STRN3    | striatin, calmodulin binding protein 3                                          | 0  | 1 | 1.86546 |
| SLC35A4  | solute carrier family 35, member A4                                             | 0  | 1 | 1.83214 |
| CPSF4    | cleavage and polyadenylation specific factor 4                                  | 0  | 1 | 1.8     |
| MARCKSL1 | MARCKS-like 1                                                                   | 2  | 1 | 1.8     |
| TFPI2    | tissue factor pathway inhibitor 2                                               | 0  | 1 | 1.8     |
| FSCN1    | fascin homolog 1, actin bundling protein (Strongylocentrotus purpuratus)        | 0  | 1 | 1.76897 |
| LMNB1    | lamin B1                                                                        | 0  | 1 | 1.76897 |

|           |                                                                     |    |   |         |
|-----------|---------------------------------------------------------------------|----|---|---------|
| GPX7      | glutathione peroxidase 7                                            | 2  | 1 | 1.73898 |
| OSGIN2    | oxidative stress induced growth inhibitor family member 2           | 0  | 1 | 1.73898 |
| FBXO9     | f-box protein 9                                                     | 0  | 1 | 1.71    |
| MAF1      | MAF1 homolog (S. cerevisiae)                                        | 0  | 1 | 1.71    |
| CCNL1     | cyclin L1                                                           | 0  | 1 | 1.65483 |
| CTNNBIP1  | catenin beta interacting protein 1                                  | 1  | 2 | 1.6416  |
| EGLN2     | EGL nine homolog 2 (C. elegans)                                     | 2  | 1 | 1.60313 |
| PLCL2     | phospholipase C-like 2                                              | 0  | 1 | 1.60313 |
| GPR64     | G protein-coupled receptor 64                                       | 0  | 2 | 1.60312 |
| ALDH1A2   | aldehyde dehydrogenase family 1, subfamily A2                       | 2  | 1 | 1.57846 |
| DHX15     | DEAH (Asp-Glu-Ala-His) box polypeptide 15                           | 1  | 1 | 1.57846 |
| HOXD10    | homeobox D10                                                        | 0  | 1 | 1.55455 |
| RGS7      | regulator of G protein signaling 7                                  | 0  | 1 | 1.55455 |
| UBA6      | ubiquitin-like modifier activating enzyme 6                         | 1  | 2 | 1.54286 |
| FXR2      | fragile X mental retardation, autosomal homolog 2                   | 0  | 1 | 1.50882 |
| HCN3      | hyperpolarization-activated, cyclic nucleotide-gated K+ 3           | 0  | 1 | 1.50882 |
| NCOR2     | nuclear receptor co-repressor 2                                     | 1  | 1 | 1.50882 |
| NDFIP2    | Nedd4 family interacting protein 2                                  | 0  | 1 | 1.48696 |
| NONO      | non-POU-domain-containing, octamer binding protein                  | 0  | 1 | 1.48696 |
| CDC42BPB  | CDC42 binding protein kinase beta                                   | 0  | 1 | 1.46572 |
| GABARAPL2 | gamma-aminobutyric acid (GABA) A receptor-associated protein-like 2 | 1  | 1 | 1.46572 |
| GPBP1     | GC-rich promoter binding protein 1                                  | 0  | 1 | 1.46572 |
| SMAP1     | stromal membrane-associated protein 1                               | 1  | 1 | 1.425   |
| LDHA      | lactate dehydrogenase A                                             | 5  | 1 | 1.40548 |
| CUL3      | cullin 3                                                            | 1  | 1 | 1.38648 |
| CAR2      | carbonic anhydrase 2                                                | 4  | 1 | 1.368   |
| TRIM63    | tripartite motif-containing 63                                      | 0  | 1 | 1.368   |
| MDFIC     | MyoD family inhibitor domain containing                             | 0  | 2 | 1.35894 |
| LEF1      | lymphoid enhancer binding factor 1                                  | 11 | 1 | 1.35    |
| NCOA1     | nuclear receptor coactivator 1                                      | 0  | 1 | 1.35    |
| HOXA1     | homeobox A1                                                         | 0  | 2 | 1.34117 |
| ACCN1     | amiloride-sensitive cation channel 1, neuronal (degenerin)          | 1  | 1 | 1.33247 |
| NUMBL     | numb-like                                                           | 1  | 1 | 1.33247 |
| SC4MOL    | sterol-C4-methyl oxidase-like                                       | 2  | 1 | 1.31538 |
| TMEM178   | transmembrane protein 178                                           | 0  | 1 | 1.31538 |
| BET1      | blocked early in transport 1 homolog (S. cerevisiae)                | 1  | 1 | 1.29874 |
| PNOC      | prepronociceptin                                                    | 0  | 1 | 1.29874 |
| FAM135A   | family with sequence similarity 135, member A                       | 0  | 1 | 1.2825  |

|         |                                                                   |   |   |         |
|---------|-------------------------------------------------------------------|---|---|---------|
| WNT1    | wingless-related MMTV integration site 1                          | 5 | 1 | 1.2825  |
| CD163   | CD163 antigen                                                     | 0 | 1 | 1.26666 |
| PTGER4  | prostaglandin E receptor 4 (subtype EP4)                          | 1 | 1 | 1.26666 |
| SLC6A14 | solute carrier family 6 (neurotransmitter transporter), member 14 | 0 | 1 | 1.26666 |
| ARSJ    | arylsulfatase J                                                   | 0 | 1 | 1.25122 |
| B4GALT2 | UDP-Gal:betaGlcNAc beta 1,4- galactosyltransferase, polypeptide 2 | 5 | 1 | 1.25122 |
| RALGDS  | ral guanine nucleotide dissociation stimulator                    | 3 | 1 | 1.25122 |
| YTHDF2  | YTH domain family 2                                               | 0 | 1 | 1.25122 |
| CALCR   | calcitonin receptor                                               | 1 | 2 | 1.24364 |
| GIT1    | G protein-coupled receptor kinase-interactor 1                    | 2 | 1 | 1.20706 |
| NPEPPS  | aminopeptidase puromycin sensitive                                | 0 | 1 | 1.20706 |
| PDCD4   | programmed cell death 4                                           | 0 | 1 | 1.20706 |
| SNX5    | sorting nexin 5                                                   | 0 | 1 | 1.20706 |
| KDM6A   | 4lysine (K)-specific demethylase 6A                               | 0 | 1 | 1.17931 |
| AMBRA1  | autophagy/beclin 1 regulator 1                                    | 0 | 1 | 1.16591 |
| CFL2    | cofilin 2, muscle                                                 | 3 | 2 | 1.15932 |
| E2F5    | E2F transcription factor 5                                        | 2 | 1 | 1.15281 |
| CAPRIN1 | cell cycle associated protein 1                                   | 0 | 2 | 1.14637 |
| RCN1    | reticulocalbin 1                                                  | 0 | 1 | 1.14    |
| TUSC2   | tumor suppressor candidate 2                                      | 0 | 1 | 1.12747 |
| WASF1   | WASP family 1                                                     | 4 | 1 | 1.12747 |
| DBC1    | deleted in bladder cancer 1 (human)                               | 0 | 1 | 1.11522 |
| FAM108C | family with sequence similarity 108, member C                     | 0 | 1 | 1.11522 |
| SLITRK4 | SLIT and NTRK-like family, member 4                               | 0 | 1 | 1.11522 |
| USP46   | ubiquitin specific peptidase 46                                   | 0 | 2 | 1.11522 |
| EI24    | etoposide induced 2.4 mRNA                                        | 1 | 1 | 1.10322 |
| GPR85   | G protein-coupled receptor 85                                     | 0 | 1 | 1.10322 |
| HNF4G   | hepatocyte nuclear factor 4, gamma                                | 1 | 1 | 1.10322 |
| IDH1    | isocitrate dehydrogenase 1 (NADP+), soluble                       | 4 | 1 | 1.10322 |
| CACNB3  | calcium channel, voltage-dependent, beta 3 subunit                | 5 | 1 | 1.09149 |
| FUT8    | fucosyltransferase 8                                              | 3 | 1 | 1.09149 |
| ELF5    | E74-like factor 5                                                 | 0 | 1 | 1.08    |
| MEST    | mesoderm specific transcript                                      | 0 | 1 | 1.08    |
| PDIA6   | protein disulfide isomerase associated 6                          | 1 | 1 | 1.08    |
| SRPR    | signal recognition particle receptor ('docking protein')          | 1 | 1 | 1.08    |
| FBN1    | fibrillin 1                                                       | 0 | 1 | 1.06875 |
| GTF2H1  | general transcription factor II H, polypeptide 1                  | 2 | 1 | 1.06875 |
| TOX3    | TOX high mobility group box family member 3                       | 0 | 1 | 1.06875 |



|           |                                                                                         |    |   |          |
|-----------|-----------------------------------------------------------------------------------------|----|---|----------|
| ASF1A     | ASF1 anti-silencing function 1 homolog A ( <i>S. cerevisiae</i> )                       | 0  | 1 | 1.05773  |
| CD320     | CD320 antigen                                                                           | 0  | 1 | 1.05773  |
| FAM108B   | family with sequence similarity 108, member B                                           | 0  | 1 | 1.05773  |
| RNF43     | ring finger protein 43                                                                  | 0  | 1 | 1.05773  |
| UBE2D1    | ubiquitin-conjugating enzyme E2D 1, UBC4/5 homolog (yeast)                              | 2  | 1 | 1.05773  |
| NUAK1     | NUAK family, SNF1-like kinase, 1                                                        | 0  | 2 | 1.05231  |
| ELF2      | E74-like factor 2                                                                       | 0  | 1 | 1.04694  |
| HLTF      | helicase-like transcription factor                                                      | 0  | 1 | 1.04694  |
| BCKDK     | branched chain ketoacid dehydrogenase kinase                                            | 0  | 1 | 1.03637  |
| ABR       | active BCR-related gene                                                                 | 0  | 2 | 1.026    |
| PAQR9     | progesterin and adipoQ receptor family member IX                                        | 0  | 1 | 1.026    |
| ZCCHC17   | zinc finger, CCHC domain containing 17                                                  | 0  | 1 | 1.026    |
| DACH1     | dachshund 1 ( <i>Drosophila</i> )                                                       | 0  | 2 | 1.0209   |
| ANGPT2    | angiopoietin 2                                                                          | 0  | 1 | 1.01584  |
| GGNBP2    | gametogenetin binding protein 2                                                         | 0  | 1 | 1.01584  |
| KLF3      | Kruppel-like factor 3 (basic)                                                           | 0  | 1 | 1.01584  |
| TAF5      | TAF5 RNA polymerase II, TATA box binding protein (TBP)-associated factor                | 1  | 1 | 1.01584  |
| G3BP2     | GTPase activating protein (SH3 domain) binding protein 2                                | 0  | 2 | 1.01084  |
| FUNDC2    | FUN14 domain containing 2                                                               | 0  | 1 | 1.00588  |
| PPP1R10   | protein phosphatase 1, regulatory subunit 10                                            | 0  | 1 | 1.00588  |
| REV3L     | REV3-like, catalytic subunit of DNA polymerase zeta RAD54 like ( <i>S. cerevisiae</i> ) | 1  | 1 | 1.00588  |
| SLITRK6   | SLIT and NTRK-like family, member 6                                                     | 0  | 1 | 1.00588  |
| TNFRSF11B | tumor necrosis factor receptor superfamily, member 11b (osteoprotegerin)                | 1  | 1 | 1.00588  |
| EPB4.1L5  | erythrocyte protein band 4.1-like 5                                                     | 0  | 1 | 0.996115 |
| KCNK5     | potassium channel, subfamily K, member 5                                                | 1  | 1 | 0.986539 |
| MET       | met proto-oncogene                                                                      | 10 | 2 | 0.981819 |
| KCNK3     | potassium channel, subfamily K, member 3                                                | 0  | 1 | 0.977145 |
| SGSM2     | small G protein signaling modulator 2                                                   | 0  | 1 | 0.977145 |
| FLI1      | Friend leukemia integration 1                                                           | 0  | 1 | 0.958879 |
| CNTNAP1   | contactin associated protein-like 1                                                     | 1  | 1 | 0.950001 |
| GALNT1    | UDP-N-acetyl-alpha-D-galactosamine:polypeptide N-acetylgalactosaminyltransferase 1      | 2  | 1 | 0.950001 |
| PICALM    | phosphatidylinositol binding clathrin assembly protein                                  | 0  | 1 | 0.950001 |
| HS6ST2    | heparan sulfate 6-O-sulfotransferase 2                                                  | 1  | 2 | 0.949999 |
| NDST1     | N-deacetylase/N-sulfotransferase (heparan glucosaminyl) 1                               | 2  | 2 | 0.945622 |
| CCDC97    | coiled-coil domain containing 97                                                        | 0  | 1 | 0.941283 |
| IRF2      | interferon regulatory factor 2                                                          | 0  | 1 | 0.941283 |
| SDHC      | succinate dehydrogenase complex, subunit C, integral membrane protein                   | 6  | 1 | 0.932727 |

|          |                                                                                                                  |    |   |          |
|----------|------------------------------------------------------------------------------------------------------------------|----|---|----------|
| TOX      | thymocyte selection-associated high mobility group box                                                           | 0  | 1 | 0.932727 |
| ACSL4    | acyl-CoA synthetase long-chain family member 4                                                                   | 5  | 2 | 0.928507 |
| ATP6V1B2 | ATPase, H <sup>+</sup> transporting, lysosomal V1 subunit B2                                                     | 4  | 1 | 0.924325 |
| INPP5A   | inositol polyphosphate-5-phosphatase A                                                                           | 3  | 1 | 0.924325 |
| PLAGL1   | pleiomorphic adenoma gene-like 1                                                                                 | 0  | 1 | 0.924325 |
| TCFAP2C  | transcription factor AP-2, gamma                                                                                 | 0  | 1 | 0.924325 |
| HTR2C    | 5-hydroxytryptamine (serotonin) receptor 2C                                                                      | 3  | 2 | 0.924323 |
| ARHGAP1  | Rho GTPase activating protein 1                                                                                  | 0  | 1 | 0.91607  |
| MAP2K1   | mitogen-activated protein kinase kinase 1                                                                        | 37 | 1 | 0.91607  |
| P4HA1    | procollagen-proline, 2-oxoglutarate 4-dioxygenase (proline 4-hydroxylase), alpha 1 polypeptide                   | 2  | 1 | 0.91607  |
| SEMA4C   | sema domain, immunoglobulin domain (Ig), transmembrane domain (TM) and short cytoplasmic domain, (semaphorin) 4C | 1  | 1 | 0.91607  |
| AXL      | AXL receptor tyrosine kinase                                                                                     | 0  | 1 | 0.907964 |
| CNNM4    | cyclin M4                                                                                                        | 0  | 1 | 0.907964 |
| DUSP6    | dual specificity phosphatase 6                                                                                   | 1  | 1 | 0.907964 |
| LBR      | lamin B receptor                                                                                                 | 0  | 1 | 0.907964 |
| OCLN     | occludin                                                                                                         | 4  | 1 | 0.900001 |
| NAA50    | N(alpha)-acetyltransferase 50, NatE catalytic subunit                                                            | 0  | 2 | 0.896069 |
| CCNL2    | cyclin L2                                                                                                        | 0  | 1 | 0.892172 |
| DLX1     | distal-less homeobox 1                                                                                           | 0  | 1 | 0.892172 |
| SPOP     | speckle-type POZ protein                                                                                         | 0  | 1 | 0.892172 |
| RNF216   | ring finger protein 216                                                                                          | 0  | 1 | 0.884482 |
| SLC27A4  | solute carrier family 27 (fatty acid transporter), member 4                                                      | 1  | 1 | 0.884482 |
| ANKRD13C | ankyrin repeat domain 13c                                                                                        | 0  | 1 | 0.876924 |
| CTCF     | CCCTC-binding factor                                                                                             | 0  | 1 | 0.876924 |
| ACTR1A   | ARP1 actin-related protein 1 homolog A, cetractin alpha (yeast)                                                  | 0  | 1 | 0.862184 |
| NAA15    | N(alpha)-acetyltransferase 15, NatA auxiliary subunit                                                            | 0  | 1 | 0.862184 |
| RBPMS2   | RNA binding protein with multiple splicing 2                                                                     | 0  | 1 | 0.855    |
| TM9SF4   | transmembrane 9 superfamily protein member 4                                                                     | 0  | 1 | 0.847935 |
| CCNE2    | cyclin E2                                                                                                        | 6  | 1 | 0.840983 |
| CHST10   | carbohydrate sulfotransferase 10                                                                                 | 0  | 1 | 0.840983 |
| PKIA     | protein kinase inhibitor, alpha                                                                                  | 0  | 2 | 0.840983 |
| ACSL1    | acyl-CoA synthetase long-chain family member 1                                                                   | 5  | 1 | 0.834147 |
| EIF2C4   | eukaryotic translation initiation factor 2C, 4                                                                   | 0  | 1 | 0.834147 |
| FIGN     | fidgetin                                                                                                         | 0  | 1 | 0.834147 |
| INO80    | INO80 homolog (S. cerevisiae)                                                                                    | 0  | 1 | 0.834147 |
| SERPINE1 | serine (or cysteine) peptidase inhibitor, clade E, member 1                                                      | 3  | 1 | 0.834147 |

|         |                                                                             |    |   |          |
|---------|-----------------------------------------------------------------------------|----|---|----------|
| SOX9    | SRY-box containing gene 9                                                   | 0  | 1 | 0.834147 |
| B3GALT2 | UDP-Gal:betaGlcNAc beta 1,3-galactosyltransferase, polypeptide 2            | 2  | 1 | 0.827421 |
| UBP1    | upstream binding protein 1                                                  | 0  | 1 | 0.827421 |
| KLF11   | Kruppel-like factor 11                                                      | 0  | 1 | 0.820799 |
| SETD8   | SET domain containing (lysine methyltransferase) 8                          | 1  | 1 | 0.820799 |
| TMOD1   | tropomodulin 1                                                              | 0  | 1 | 0.820799 |
| LRIG1   | leucine-rich repeats and immunoglobulin-like domains 1                      | 0  | 1 | 0.814286 |
| POU4F2  | POU domain, class 4, transcription factor 2                                 | 0  | 1 | 0.814286 |
| SEN2    | SUMO/sentrin specific peptidase 2                                           | 2  | 1 | 0.807875 |
| CYTH1   | cytohesin 1                                                                 | 0  | 1 | 0.795349 |
| EPS15   | epidermal growth factor receptor pathway substrate 15                       | 1  | 1 | 0.795349 |
| LARP4B  | La ribonucleoprotein domain family, member 4B                               | 0  | 1 | 0.795349 |
| RRAS2   | related RAS viral (r-ras) oncogene homolog 2                                | 3  | 1 | 0.795349 |
| BCL6    | B-cell leukemia/lymphoma 6                                                  | 0  | 1 | 0.789232 |
| CS      | citrate synthase                                                            | 3  | 1 | 0.789232 |
| ELMOD1  | ELMO domain containing 1                                                    | 0  | 1 | 0.789232 |
| NOTCH1  | Notch gene homolog 1 (Drosophila)                                           | 3  | 1 | 0.789232 |
| CSNK2A2 | casein kinase 2, alpha prime polypeptide                                    | 3  | 1 | 0.783205 |
| EBF2    | early B-cell factor 2                                                       | 0  | 1 | 0.783205 |
| TMPO    | thymopoietin                                                                | 0  | 1 | 0.783205 |
| GRM7    | glutamate receptor, metabotropic 7                                          | 1  | 1 | 0.777273 |
| MCFD2   | multiple coagulation factor deficiency 2                                    | 0  | 1 | 0.777273 |
| MEIS2   | Meis homeobox 2                                                             | 0  | 1 | 0.777273 |
| NACC1   | nucleus accumbens associated 1, BEN and BTB (POZ) domain containing         | 0  | 1 | 0.777273 |
| PPP1CB  | protein phosphatase 1, catalytic subunit, beta isoform                      | 6  | 1 | 0.777273 |
| TJP1    | tight junction protein 1                                                    | 3  | 1 | 0.777273 |
| JHDM1D  | jumonji C domain-containing histone demethylase 1 homolog D (S. cerevisiae) | 0  | 1 | 0.771429 |
| MYO1C   | myosin IC                                                                   | 0  | 1 | 0.76567  |
| TBR1    | T-box brain gene 1                                                          | 0  | 1 | 0.76     |
| TGFBR2  | transforming growth factor, beta receptor II                                | 10 | 2 | 0.757196 |
| CHUK    | conserved helix-loop-helix ubiquitous kinase                                | 19 | 1 | 0.754412 |
| DAB2    | disabled homolog 2 (Drosophila)                                             | 1  | 1 | 0.754412 |
| TMEM50B | transmembrane protein 50B                                                   | 0  | 1 | 0.754412 |
| VAMP2   | vesicle-associated membrane protein 2                                       | 3  | 1 | 0.754412 |
| LGR4    | leucine-rich repeat-containing G protein-coupled receptor 4                 | 1  | 1 | 0.748904 |
| FAM175B | family with sequence similarity 175, member B                               | 0  | 1 | 0.743478 |
| LENG8   | leukocyte receptor cluster (LRC) member 8                                   | 0  | 1 | 0.743478 |
| LPHN2   | latrophilin 2                                                               | 0  | 1 | 0.743478 |

|           |                                                                                     |   |   |          |
|-----------|-------------------------------------------------------------------------------------|---|---|----------|
| TSHZ3     | teashirt zinc finger family member 3                                                | 0 | 1 | 0.743478 |
| STX12     | syntaxin 12                                                                         | 1 | 1 | 0.73813  |
| TMEM55A   | transmembrane protein 55A                                                           | 0 | 1 | 0.73813  |
| ADRA2B    | adrenergic receptor, alpha 2b                                                       | 1 | 1 | 0.732858 |
| GJA1      | gap junction protein, alpha 1                                                       | 2 | 1 | 0.732858 |
| TLK1      | tousled-like kinase 1                                                               | 0 | 1 | 0.732858 |
| JAG1      | jagged 1                                                                            | 1 | 1 | 0.727659 |
| PROSAP1P1 | ProSAPiP1 protein                                                                   | 0 | 1 | 0.727659 |
| SDC1      | syndecan 1                                                                          | 3 | 1 | 0.727659 |
| GATA6     | GATA binding protein 6                                                              | 0 | 1 | 0.722536 |
| RIC8B     | resistance to inhibitors of cholinesterase 8 homolog B (C. elegans)                 | 0 | 1 | 0.722536 |
| SGK1      | serum/glucocorticoid regulated kinase 1                                             | 1 | 1 | 0.722536 |
| ZDHHC17   | zinc finger, DHHC domain containing 17                                              | 0 | 1 | 0.722536 |
| ANKRD28   | ankyrin repeat domain 28                                                            | 0 | 1 | 0.717484 |
| DNAJC6    | DnaJ (Hsp40) homolog, subfamily C, member 6                                         | 1 | 1 | 0.717484 |
| MAP3K3    | mitogen-activated protein kinase kinase kinase 3                                    | 3 | 1 | 0.717484 |
| METAP1    | methionyl aminopeptidase 1                                                          | 0 | 1 | 0.717484 |
| MYRIP     | myosin VIIA and Rab interacting protein                                             | 0 | 1 | 0.717484 |
| JAZF1     | JAZF zinc finger 1                                                                  | 0 | 1 | 0.712499 |
| PROSC     | proline synthetase co-transcribed                                                   | 0 | 1 | 0.712499 |
| SLC25A36  | solute carrier family 25, member 36                                                 | 0 | 1 | 0.712499 |
| ACBD3     | acyl-Coenzyme A binding domain containing 3                                         | 0 | 1 | 0.702741 |
| DPYSL2    | dihydropyrimidinase-like 2                                                          | 1 | 1 | 0.702741 |
| MAT2A     | methionine adenosyltransferase II, alpha                                            | 3 | 1 | 0.702741 |
| FOSB      | FBJ osteosarcoma oncogene B                                                         | 0 | 1 | 0.697958 |
| TEAD1     | TEA domain family member 1                                                          | 0 | 1 | 0.697958 |
| SOX11     | SRY-box containing gene 11                                                          | 0 | 2 | 0.695593 |
| TRIM2     | tripartite motif-containing 2                                                       | 0 | 2 | 0.68859  |
| ADD3      | adducin 3 (gamma)                                                                   | 0 | 1 | 0.683999 |
| RAD21     | RAD21 homolog (S. pombe)                                                            | 1 | 1 | 0.683999 |
| VCL       | vinculin                                                                            | 6 | 1 | 0.683999 |
| CNTNAP2   | contactin associated protein-like 2                                                 | 1 | 1 | 0.67947  |
| JARID2    | jumonji, AT rich interactive domain 2                                               | 0 | 1 | 0.67947  |
| MAP3K12   | mitogen-activated protein kinase kinase kinase 12                                   | 1 | 1 | 0.675001 |
| TIAM1     | T-cell lymphoma invasion and metastasis 1                                           | 2 | 1 | 0.675001 |
| CCNG1     | cyclin G1                                                                           | 1 | 1 | 0.670587 |
| GALNT7    | UDP-N-acetyl-alpha-D-galactosamine: polypeptide N-acetylgalactosaminyltransferase 7 | 2 | 1 | 0.670587 |

|          |                                                                                                         |    |   |          |
|----------|---------------------------------------------------------------------------------------------------------|----|---|----------|
| RRAGC    | Ras-related GTP binding C                                                                               | 0  | 1 | 0.670587 |
| FKBP5    | FK506 binding protein 5                                                                                 | 0  | 1 | 0.666234 |
| RAI14    | retinoic acid induced 14                                                                                | 0  | 1 | 0.666234 |
| GOLPH3L  | golgi phosphoprotein 3-like                                                                             | 0  | 1 | 0.661936 |
| NEK6     | NIMA (never in mitosis gene a)-related expressed kinase 6                                               | 0  | 1 | 0.661936 |
| SMARCC1  | SWI/SNF related, matrix associated, actin dependent regulator of chromatin, subfamily c, member 1       | 0  | 1 | 0.661936 |
| PPP2R3A  | protein phosphatase 2, regulatory subunit B", alpha                                                     | 0  | 1 | 0.657691 |
| SEMA4F   | sema domain, immunoglobulin domain (Ig), TM domain, and short cytoplasmic domain                        | 1  | 1 | 0.657691 |
| BTBD11   | BTB (POZ) domain containing 11                                                                          | 0  | 1 | 0.653503 |
| DIP2C    | DIP2 disco-interacting protein 2 homolog C (Drosophila)                                                 | 0  | 1 | 0.653503 |
| CITED2   | Cbp/p300-interacting transactivator, with Glu/Asp-rich carboxy-terminal domain, 2                       | 0  | 1 | 0.649368 |
| ZMYND11  | zinc finger, MYND domain containing 11                                                                  | 0  | 1 | 0.649368 |
| MAPRE1   | microtubule-associated protein, RP/EB family, member 1                                                  | 0  | 1 | 0.645282 |
| SLC1A1   | solute carrier family 1 (neuronal/epithelial high affinity glutamate transporter, system Xag), member 1 | 1  | 1 | 0.645282 |
| DMBX1    | diencephalon/mesencephalon homeobox 1                                                                   | 0  | 1 | 0.637267 |
| SAR1A    | SAR1 gene homolog A (S. cerevisiae)                                                                     | 1  | 1 | 0.633334 |
| UBAP2    | ubiquitin-associated protein 2                                                                          | 0  | 1 | 0.633334 |
| SLMAP    | sarcolemma associated protein                                                                           | 0  | 1 | 0.629447 |
| GRB10    | growth factor receptor bound protein 10                                                                 | 0  | 1 | 0.62561  |
| TNFAIP3  | tumor necrosis factor, alpha-induced protein 3                                                          | 1  | 1 | 0.62561  |
| BRPF3    | bromodomain and PHD finger containing, 3                                                                | 0  | 1 | 0.621819 |
| SMAD3    | MAD homolog 3 (Drosophila)                                                                              | 10 | 1 | 0.621819 |
| YES1     | Yamaguchi sarcoma viral (v-yes) oncogene homolog 1                                                      | 2  | 1 | 0.621819 |
| LANCL1   | LanC (bacterial lantibiotic synthetase component C)-like 1                                              | 0  | 1 | 0.610715 |
| RAB43    | RAB43, member RAS oncogene family                                                                       | 0  | 1 | 0.603529 |
| FZD7     | frizzled homolog 7 (Drosophila)                                                                         | 4  | 1 | 0.600001 |
| IVNS1ABP | influenza virus NS1A binding protein                                                                    | 0  | 1 | 0.600001 |
| MPP2     | membrane protein, palmitoylated 2 (MAGUK p55 subfamily member 2)                                        | 0  | 1 | 0.600001 |
| PAK2     | p21 protein (Cdc42/Rac)-activated kinase 2                                                              | 7  | 1 | 0.600001 |
| SIRPA    | signal-regulatory protein alpha                                                                         | 0  | 1 | 0.600001 |
| ZEB1     | zinc finger E-box binding homeobox 1                                                                    | 0  | 1 | 0.600001 |
| FAM70A   | family with sequence similarity 70, member A                                                            | 0  | 1 | 0.596511 |
| FNDC3A   | fibronectin type III domain containing 3A                                                               | 0  | 1 | 0.596511 |
| PPP1R16B | protein phosphatase 1, regulatory (inhibitor) subunit 16B                                               | 0  | 1 | 0.596511 |
| CPLX2    | complexin 2                                                                                             | 0  | 1 | 0.593064 |

|          |                                                                                              |    |   |          |
|----------|----------------------------------------------------------------------------------------------|----|---|----------|
| MEIS1    | Meis homeobox 1                                                                              | 0  | 1 | 0.593064 |
| RUNX1T1  | runt-related transcription factor 1; translocated to, 1 (cyclin D-related)                   | 2  | 1 | 0.593064 |
| CCND1    | cyclin D1                                                                                    | 19 | 1 | 0.586285 |
| ERBB2IP  | ErbB2 interacting protein                                                                    | 1  | 1 | 0.586285 |
| PRDM1    | PR domain containing 1, with ZNF domain                                                      | 0  | 1 | 0.586285 |
| PRPF4B   | PRP4 pre-mRNA processing factor 4 homolog B (yeast)                                          | 0  | 1 | 0.586285 |
| KPNA4    | karyopherin (importin) alpha 4                                                               | 0  | 1 | 0.582954 |
| LASS6    | LAG1 homolog, ceramide synthase 6                                                            | 0  | 1 | 0.579661 |
| TOP1     | topoisomerase (DNA) I                                                                        | 0  | 1 | 0.579661 |
| LDLRAD3  | low density lipoprotein receptor class A domain containing 3                                 | 0  | 1 | 0.576404 |
| YWHAG    | tyrosine 3-monooxygenase/tryptophan 5-monooxygenase activation protein,<br>gamma polypeptide | 3  | 1 | 0.576404 |
| NFAT5    | nuclear factor of activated T-cells 5                                                        | 6  | 2 | 0.57479  |
| CAMK2G   | calcium/calmodulin-dependent protein kinase II gamma                                         | 11 | 1 | 0.56685  |
| CLDN12   | claudin 12                                                                                   | 0  | 1 | 0.563736 |
| MYH9     | myosin, heavy polypeptide 9, non-muscle                                                      | 3  | 1 | 0.563736 |
| PEA15A   | phosphoprotein enriched in astrocytes 15A                                                    | 0  | 1 | 0.563736 |
| RAD23B   | RAD23b homolog (S. cerevisiae)                                                               | 2  | 1 | 0.563736 |
| CLCN3    | chloride channel 3                                                                           | 0  | 1 | 0.560656 |
| PIP4K2B  | phosphatidylinositol-5-phosphate 4-kinase, type II, beta                                     | 3  | 1 | 0.560656 |
| ERLIN2   | ER lipid raft associated 2                                                                   | 0  | 1 | 0.557609 |
| SPOCK1   | sparc/osteonectin, cwcv and kazal-like domains proteoglycan 1                                | 0  | 1 | 0.557609 |
| FOXJ2    | forkhead box J2                                                                              | 0  | 1 | 0.554594 |
| MARCKS   | myristoylated alanine rich protein kinase C substrate                                        | 1  | 1 | 0.554594 |
| ELF4     | E74-like factor 4 (ets domain transcription factor)                                          | 0  | 1 | 0.548664 |
| ARHGAP20 | Rho GTPase activating protein 20                                                             | 0  | 1 | 0.545744 |
| GNG2     | guanine nucleotide binding protein (G protein), gamma 2                                      | 1  | 1 | 0.545744 |
| SOCS6    | suppressor of cytokine signaling 6                                                           | 0  | 1 | 0.545744 |
| CTNND1   | catenin (cadherin associated protein), delta 1                                               | 2  | 1 | 0.542857 |
| ITCH     | itchy, E3 ubiquitin protein ligase                                                           | 2  | 1 | 0.542857 |
| NRIP3    | nuclear receptor interacting protein 3                                                       | 0  | 1 | 0.542857 |
| BDNF     | brain derived neurotrophic factor                                                            | 3  | 1 | 0.540001 |
| HAS2     | hyaluronan synthase 2                                                                        | 0  | 1 | 0.540001 |
| PAX9     | paired box gene 9                                                                            | 0  | 1 | 0.534375 |
| SEC24A   | Sec24 related gene family, member A (S. cerevisiae)                                          | 1  | 1 | 0.534375 |
| BNIP3L   | BCL2/adenovirus E1B interacting protein 3-like                                               | 0  | 1 | 0.528865 |
| TMEM64   | transmembrane protein 64                                                                     | 0  | 1 | 0.528865 |
| MAP3K7   | mitogen-activated protein kinase kinase kinase 7                                             | 9  | 1 | 0.526154 |

|          |                                                                                        |    |   |          |
|----------|----------------------------------------------------------------------------------------|----|---|----------|
| ARHGAP24 | Rho GTPase activating protein 24                                                       | 0  | 1 | 0.52347  |
| CTDSPL   | CTD (carboxy-terminal domain, RNA polymerase II, polypeptide A) small phosphatase-like | 0  | 1 | 0.52347  |
| NAV1     | neuron navigator 1                                                                     | 0  | 1 | 0.52347  |
| VAT1     | vesicle amine transport protein 1 homolog (T californica)                              | 0  | 1 | 0.52347  |
| CLIC4    | chloride intracellular channel 4 (mitochondrial)                                       | 0  | 1 | 0.520812 |
| PDE4B    | phosphodiesterase 4B, cAMP specific                                                    | 1  | 1 | 0.520812 |
| SLC39A10 | solute carrier family 39 (zinc transporter), member 10                                 | 0  | 1 | 0.520812 |
| ST18     | suppression of tumorigenicity 18                                                       | 0  | 1 | 0.518182 |
| ZFP367   | zinc finger protein 367                                                                | 0  | 1 | 0.518182 |
| MED1     | mediator complex subunit 1                                                             | 0  | 1 | 0.515578 |
| ACVR1B   | activin A receptor, type 1B                                                            | 1  | 1 | 0.507921 |
| ETV1     | ets variant gene 1                                                                     | 0  | 1 | 0.507921 |
| TNRC6B   | trinucleotide repeat containing 6b                                                     | 0  | 2 | 0.505419 |
| INTU     | inturned planar cell polarity effector homolog (Drosophila)                            | 0  | 1 | 0.505418 |
| CNTN2    | contactin 2                                                                            | 1  | 1 | 0.502941 |
| ERLIN1   | ER lipid raft associated 1                                                             | 0  | 1 | 0.502941 |
| PIK3R3   | phosphatidylinositol 3 kinase, regulatory subunit, polypeptide 3 (p55)                 | 39 | 1 | 0.502941 |
| BAZ2A    | bromodomain adjacent to zinc finger domain, 2A                                         | 0  | 1 | 0.500488 |
| DAAM1    | dishevelled associated activator of morphogenesis 1                                    | 1  | 1 | 0.500488 |
| SRPK2    | serine/arginine-rich protein specific kinase 2                                         | 0  | 1 | 0.500488 |
| TRIB1    | tribbles homolog 1 (Drosophila)                                                        | 0  | 1 | 0.500488 |
| GREM2    | gremlin 2 homolog, cysteine knot superfamily (Xenopus laevis)                          | 0  | 1 | 0.498059 |
| PAK3     | p21 protein (Cdc42/Rac)-activated kinase 3                                             | 6  | 1 | 0.498059 |
| GPR158   | G protein-coupled receptor 158                                                         | 0  | 1 | 0.495652 |
| KPNA1    | karyopherin (importin) alpha 1                                                         | 0  | 1 | 0.495652 |
| CREBZF   | CREB/ATF bZIP transcription factor                                                     | 0  | 1 | 0.49091  |
| DDX17    | DEAD (Asp-Glu-Ala-Asp) box polypeptide 17                                              | 0  | 1 | 0.488571 |
| GPRC5B   | G protein-coupled receptor, family C, group 5, member B                                | 0  | 1 | 0.488571 |
| MMGT1    | membrane magnesium transporter 1                                                       | 0  | 1 | 0.488571 |
| SYS1     | SYS1 Golgi-localized integral membrane protein homolog (S. cerevisiae)                 | 0  | 1 | 0.486256 |
| SEMA6A   | sema domain, transmembrane domain (TM), and cytoplasmic domain, (semaphorin) 6A        | 1  | 1 | 0.483963 |
| MAP3K1   | mitogen-activated protein kinase kinase kinase 1                                       | 5  | 1 | 0.48169  |
| FMR1     | fragile X mental retardation syndrome 1 homolog                                        | 0  | 1 | 0.479439 |
| KLHL18   | kelch-like 18 (Drosophila)                                                             | 0  | 1 | 0.479439 |
| ACVR2A   | activin receptor IIA                                                                   | 2  | 1 | 0.475    |
| AKAP6    | A kinase (PRKA) anchor protein 6                                                       | 0  | 1 | 0.475    |

|          |                                                                            |    |   |          |
|----------|----------------------------------------------------------------------------|----|---|----------|
| PTGFR    | prostaglandin F receptor                                                   | 2  | 1 | 0.475    |
| TGFBR3   | transforming growth factor, beta receptor III                              | 0  | 1 | 0.475    |
| ARHGAP26 | Rho GTPase activating protein 26                                           | 0  | 1 | 0.472811 |
| STK4     | serine/threonine kinase 4                                                  | 3  | 1 | 0.472811 |
| FOXO1    | forkhead box O1                                                            | 3  | 1 | 0.464254 |
| PPP2R5E  | protein phosphatase 2, regulatory subunit B (B56), epsilon isoform         | 2  | 1 | 0.464254 |
| FBXO41   | F-box protein 41                                                           | 0  | 1 | 0.462162 |
| ELAVL2   | ELAV (embryonic lethal, abnormal vision, Drosophila)-like 2 (Hu antigen B) | 0  | 1 | 0.46009  |
| FO XK1   | forkhead box K1                                                            | 0  | 1 | 0.46009  |
| KITL     | kit ligand                                                                 | 4  | 1 | 0.458036 |
| MBTD1    | mbt domain containing 1                                                    | 0  | 1 | 0.458036 |
| PDGFRA   | platelet derived growth factor receptor, alpha polypeptide                 | 11 | 1 | 0.458036 |
| CGGBP1   | CGG triplet repeat binding protein 1                                       | 0  | 1 | 0.456001 |
| MBNL1    | muscleblind-like 1 (Drosophila)                                            | 0  | 1 | 0.456001 |
| CADM1    | cell adhesion molecule 1                                                   | 1  | 1 | 0.453982 |
| BAZ2B    | bromodomain adjacent to zinc finger domain, 2B                             | 0  | 1 | 0.451982 |
| LAMC1    | laminin, gamma 1                                                           | 7  | 1 | 0.451982 |
| ZFH X4   | zinc finger homeodomain 4                                                  | 0  | 1 | 0.45     |
| FNBP1L   | formin binding protein 1-like                                              | 0  | 1 | 0.448035 |
| KBTBD8   | kelch repeat and BTB (POZ) domain containing 8                             | 0  | 1 | 0.448035 |
| SCN2B    | sodium channel, voltage-gated, type II, beta                               | 0  | 1 | 0.448035 |
| NDRG3    | N-myc downstream regulated gene 3                                          | 0  | 1 | 0.446087 |
| SYT1     | synaptotagmin I                                                            | 0  | 1 | 0.446087 |
| PHF15    | PHD finger protein 15                                                      | 0  | 1 | 0.442241 |
| RAB14    | RAB14, member RAS oncogene family                                          | 0  | 1 | 0.442241 |
| ZFP238   | zinc finger protein 238                                                    | 0  | 1 | 0.442241 |
| GMFB     | glia maturation factor, beta                                               | 0  | 1 | 0.440343 |
| TMCC3    | transmembrane and coiled coil domains 3                                    | 0  | 1 | 0.440343 |
| TNPO1    | transportin 1                                                              | 0  | 1 | 0.438462 |
| HIC2     | hypermethylated in cancer 2                                                | 0  | 1 | 0.434746 |
| ACAP2    | ArfGAP with coiled-coil, ankyrin repeat and PH domains 2                   | 1  | 1 | 0.432912 |
| OSBPL8   | oxysterol binding protein-like 8                                           | 0  | 1 | 0.432912 |
| SRSF1    | serine/arginine-rich splicing factor 1                                     | 1  | 1 | 0.432912 |
| ANKFY1   | ankyrin repeat and FYVE domain containing 1                                | 0  | 1 | 0.431092 |
| NACC2    | nucleus accumbens associated 2, BEN and BTB (POZ) domain containing        | 0  | 1 | 0.4275   |
| RBM25    | RNA binding motif protein 25                                               | 1  | 1 | 0.4275   |
| ZFH X3   | zinc finger homeobox 3                                                     | 0  | 1 | 0.425726 |
| MAF      | avian musculoaponeurotic fibrosarcoma (v-maf) AS42 oncogene homolog        | 0  | 1 | 0.423967 |



|         |                                                                                                   |    |   |          |
|---------|---------------------------------------------------------------------------------------------------|----|---|----------|
| ASB1    | ankyrin repeat and SOCS box-containing 1                                                          | 0  | 1 | 0.420491 |
| RAP2A   | RAS related protein 2a                                                                            | 0  | 1 | 0.418775 |
| FOXP2   | forkhead box P2                                                                                   | 0  | 1 | 0.417073 |
| DCAF7   | DDB1 and CUL4 associated factor 7                                                                 | 0  | 1 | 0.415385 |
| RYBP    | RING1 and YY1 binding protein                                                                     | 0  | 1 | 0.413709 |
| ESRRG   | estrogen-related receptor gamma                                                                   | 0  | 1 | 0.408765 |
| BCL2L11 | BCL2-like 11 (apoptosis facilitator)                                                              | 0  | 1 | 0.400782 |
| FNDC3B  | fibronectin type III domain containing 3B                                                         | 0  | 1 | 0.400782 |
| NEGR1   | neuronal growth regulator 1                                                                       | 1  | 1 | 0.399222 |
| STK35   | serine/threonine kinase 35                                                                        | 0  | 1 | 0.396139 |
| TAB3    | TGF-beta activated kinase 1/MAP3K7 binding protein 3                                              | 1  | 1 | 0.391603 |
| CAMK1D  | calcium/calmodulin-dependent protein kinase ID                                                    | 0  | 1 | 0.38717  |
| FBXO28  | F-box protein 28                                                                                  | 0  | 1 | 0.385714 |
| ROBO2   | roundabout homolog 2 (Drosophila)                                                                 | 1  | 1 | 0.385714 |
| FAM126A | family with sequence similarity 126, member A                                                     | 0  | 1 | 0.38427  |
| MYO5A   | myosin VA                                                                                         | 0  | 1 | 0.38427  |
| CACNA1E | calcium channel, voltage-dependent, R type, alpha 1E subunit                                      | 3  | 1 | 0.375824 |
| PLAGL2  | pleiomorphic adenoma gene-like 2                                                                  | 0  | 1 | 0.369065 |
| MLLT3   | myeloid/lymphoid or mixed-lineage leukemia (trithorax homolog, Drosophila);<br>translocated to, 3 | 0  | 1 | 0.361268 |
| WNK1    | WNK lysine deficient protein kinase 1                                                             | 0  | 1 | 0.36     |
| NR6A1   | nuclear receptor subfamily 6, group A, member 1                                                   | 0  | 1 | 0.357491 |
| CXCL12  | chemokine (C-X-C motif) ligand 12                                                                 | 5  | 1 | 0.355017 |
| CLOCK   | circadian locomotor output cycles kaput                                                           | 1  | 1 | 0.344295 |
| DNM3    | dynamin 3                                                                                         | 3  | 1 | 0.340864 |
| MTF1    | metal response element binding transcription factor 1                                             | 0  | 1 | 0.339735 |
| CAMTA1  | calmodulin binding transcription activator 1                                                      | 0  | 1 | 0.3375   |
| FRMD4A  | FERM domain containing 4A                                                                         | 0  | 1 | 0.3375   |
| GABRB2  | gamma-aminobutyric acid (GABA) A receptor, subunit beta 2                                         | 1  | 1 | 0.327796 |
| CSNK1G1 | casein kinase 1, gamma 1                                                                          | 1  | 1 | 0.323659 |
| QK      | quaking                                                                                           | 0  | 1 | 0.319626 |
| PTEN    | phosphatase and tensin homolog                                                                    | 11 | 1 | 0.30997  |
| FUT9    | fucosyltransferase 9                                                                              | 3  | 1 | 0.301765 |
| CELF2   | CUGBP, Elav-like family member 2                                                                  | 0  | 1 | 0.298256 |
| DCX     | doublecortin                                                                                      | 0  | 1 | 0.295677 |
| TBL1XR1 | transducin (beta)-like 1X-linked receptor 1                                                       | 1  | 1 | 0.294827 |
| ITSN1   | intersectin 1 (SH3 domain protein 1A)                                                             | 0  | 1 | 0.278049 |

**Supplemental Table S3.** Significantly enriched pathways that regulate these targets in the functional annotation.

**Supplemental Table S3A. C57BL6.**

| CATEGORY | TERM                              | TERM_ID | URL                                                                                                                                                                                                                                                                                                                                                                 | TOTAL_GENES_OF_THE_TERM | UNION_TARGETS_IN_THE_TERM | MIRS_IN_THE_TERM | SCORE |
|----------|-----------------------------------|---------|---------------------------------------------------------------------------------------------------------------------------------------------------------------------------------------------------------------------------------------------------------------------------------------------------------------------------------------------------------------------|-------------------------|---------------------------|------------------|-------|
| KEGG     | T_CELL_RECEPTOR_SIGNALING_PATHWAY | 4660    | <a href="http://www.kegg.jp/kegg-bin/show_pathway?mmu04660+mmu:12402+mmu:12540+mmu:17974+mmu:18481+mmu:26409+mmu:26417+mmu:54446">http://www.kegg.jp/kegg-bin/show_pathway?mmu04660+mmu:12402+mmu:12540+mmu:17974+mmu:18481+mmu:26409+mmu:26417+mmu:54446</a>                                                                                                       | 109                     | 7                         | 3                | 1.869 |
| KEGG     | AXON_GUIDANCE                     | 4360    | <a href="http://www.kegg.jp/kegg-bin/show_pathway?mmu04360+mmu:12540+mmu:12632+mmu:12934+mmu:17295+mmu:17974+mmu:18481+mmu:20358+mmu:214968+mmu:26417+mmu:54446">http://www.kegg.jp/kegg-bin/show_pathway?mmu04360+mmu:12540+mmu:12632+mmu:12934+mmu:17295+mmu:17974+mmu:18481+mmu:20358+mmu:214968+mmu:26417+mmu:54446</a>                                         | 131                     | 10                        | 4                | 1.671 |
| KEGG     | FOCAL_ADHESION                    | 4510    | <a href="http://www.kegg.jp/kegg-bin/show_pathway?mmu04510+mmu:107589+mmu:11461+mmu:12540+mmu:16000+mmu:17295+mmu:18481+mmu:18590+mmu:21825+mmu:22339+mmu:226519+mmu:26417">http://www.kegg.jp/kegg-bin/show_pathway?mmu04510+mmu:107589+mmu:11461+mmu:12540+mmu:16000+mmu:17295+mmu:18481+mmu:18590+mmu:21825+mmu:22339+mmu:226519+mmu:26417</a>                   | 197                     | 11                        | 3                | 1.436 |
| KEGG     | CELL_ADHESION_MOLECULES(CAMS)     | 4514    | <a href="http://www.kegg.jp/kegg-bin/show_pathway?mmu04514+mmu:17528+mmu:18260+mmu:20969+mmu:320840">http://www.kegg.jp/kegg-bin/show_pathway?mmu04514+mmu:17528+mmu:18260+mmu:20969+mmu:320840</a>                                                                                                                                                                 | 149                     | 4                         | 3                | 1.428 |
| KEGG     | ENDOCYTOSIS                       | 4144    | <a href="http://www.kegg.jp/kegg-bin/show_pathway?mmu04144+mmu:12402+mmu:12540+mmu:13132+mmu:15511+mmu:17127+mmu:17295+mmu:216963+mmu:21813+mmu:26385+mmu:67300+mmu:78618+mmu:98366">http://www.kegg.jp/kegg-bin/show_pathway?mmu04144+mmu:12402+mmu:12540+mmu:13132+mmu:15511+mmu:17127+mmu:17295+mmu:216963+mmu:21813+mmu:26385+mmu:67300+mmu:78618+mmu:98366</a> | 219                     | 12                        | 4                | 1.416 |
| KEGG     | REGULATION_OF_ACTIN_CYTOSKELETON  | 4810    | <a href="http://www.kegg.jp/kegg-bin/show_pathway?mmu04810+mmu:107589+mmu:11461+mmu:12540+mmu:12632+mmu:14169+mmu:18481+mmu:18590+mmu:19241+mmu:216963+mmu:21844+mmu:26417">http://www.kegg.jp/kegg-bin/show_pathway?mmu04810+mmu:107589+mmu:11461+mmu:12540+mmu:12632+mmu:14169+mmu:18481+mmu:18590+mmu:19241+mmu:216963+mmu:21844+mmu:26417</a>                   | 215                     | 11                        | 4                | 1.379 |
| KEGG     | RENAL_CELL_CARCINOMA              | 5211    | <a href="http://www.kegg.jp/kegg-bin/show_pathway?mmu05211+mmu:12540+mmu:17295+mmu:18481+mmu:18590+mmu:22339+mmu:23871+mmu:26417">http://www.kegg.jp/kegg-bin/show_pathway?mmu05211+mmu:12540+mmu:17295+mmu:18481+mmu:18590+mmu:22339+mmu:23871+mmu:26417</a>                                                                                                       | 71                      | 7                         | 2                | 1.133 |
| KEGG     | WNT_SIGNALING_PATHWAY             | 4310    | <a href="http://www.kegg.jp/kegg-bin/show_pathway?mmu04310+mmu:12325+mmu:14">http://www.kegg.jp/kegg-bin/show_pathway?mmu04310+mmu:12325+mmu:14</a>                                                                                                                                                                                                                 | 153                     | 9                         | 4                | 1.065 |

|      |                                   |      |                                                                                                                                                                                                                                                                                                                                                                   |     |    |   |       |
|------|-----------------------------------|------|-------------------------------------------------------------------------------------------------------------------------------------------------------------------------------------------------------------------------------------------------------------------------------------------------------------------------------------------------------------------|-----|----|---|-------|
|      |                                   |      | 369+mmu:17127+mmu:20377+mmu:208846+mmu:26409+mmu:54446+mmu:67087+mmu:75826                                                                                                                                                                                                                                                                                        |     |    |   |       |
| KEGG | VEGF_SIGNALING_PATHWAY            | 4370 | <a href="http://www.kegg.jp/kegg-bin/show_pathway?mmu04370+mmu:12540+mmu:22339+mmu:26417+mmu:54446">http://www.kegg.jp/kegg-bin/show_pathway?mmu04370+mmu:12540+mmu:22339+mmu:26417+mmu:54446</a>                                                                                                                                                                 | 76  | 4  | 3 | 0.998 |
| KEGG | ERBB_SIGNALING_PATHWAY            | 4012 | <a href="http://www.kegg.jp/kegg-bin/show_pathway?mmu04012+mmu:12325+mmu:12402+mmu:17974+mmu:18481+mmu:26417">http://www.kegg.jp/kegg-bin/show_pathway?mmu04012+mmu:12325+mmu:12402+mmu:17974+mmu:18481+mmu:26417</a>                                                                                                                                             | 87  | 5  | 3 | 0.941 |
| KEGG | B_CELL_RECEPTOR_SIGNALING_PATHWAY | 4662 | <a href="http://www.kegg.jp/kegg-bin/show_pathway?mmu04662+mmu:26417+mmu:54446">http://www.kegg.jp/kegg-bin/show_pathway?mmu04662+mmu:26417+mmu:54446</a>                                                                                                                                                                                                         | 76  | 2  | 3 | 0.908 |
| KEGG | SALIVARY_SECRETION                | 4970 | <a href="http://www.kegg.jp/kegg-bin/show_pathway?mmu04970+mmu:12313+mmu:12314+mmu:22318+mmu:64177">http://www.kegg.jp/kegg-bin/show_pathway?mmu04970+mmu:12313+mmu:12314+mmu:22318+mmu:64177</a>                                                                                                                                                                 | 77  | 4  | 2 | 0.894 |
| KEGG | ADIPOCYTOKINE_SIGNALING_PATHWAY   | 4920 | <a href="http://www.kegg.jp/kegg-bin/show_pathway?mmu04920+mmu:12675+mmu:14081+mmu:50790">http://www.kegg.jp/kegg-bin/show_pathway?mmu04920+mmu:12675+mmu:14081+mmu:50790</a>                                                                                                                                                                                     | 68  | 4  | 3 | 0.889 |
| KEGG | NON-SMALL_CELL_LUNG_CANCER        | 5223 | <a href="http://www.kegg.jp/kegg-bin/show_pathway?mmu05223+mmu:12443+mmu:18710+mmu:26395+mmu:58231">http://www.kegg.jp/kegg-bin/show_pathway?mmu05223+mmu:12443+mmu:18710+mmu:26395+mmu:58231</a>                                                                                                                                                                 | 54  | 4  | 3 | 0.883 |
| KEGG | ECM-RECEPTOR_INTERACTION          | 4512 | <a href="http://www.kegg.jp/kegg-bin/show_pathway?mmu04512+mmu:20969+mmu:21825+mmu:226519">http://www.kegg.jp/kegg-bin/show_pathway?mmu04512+mmu:20969+mmu:21825+mmu:226519</a>                                                                                                                                                                                   | 83  | 3  | 3 | 0.876 |
| KEGG | GLUCONEOGENESIS                   | 10   | <a href="http://www.kegg.jp/kegg-bin/show_pathway?mmu00010+mmu:11674">http://www.kegg.jp/kegg-bin/show_pathway?mmu00010+mmu:11674</a>                                                                                                                                                                                                                             | 60  | 1  | 1 | 0.849 |
| KEGG | TOXOPLASMOSIS                     | 5145 | <a href="http://www.kegg.jp/kegg-bin/show_pathway?mmu05145+mmu:15511+mmu:226519+mmu:26409+mmu:26417">http://www.kegg.jp/kegg-bin/show_pathway?mmu05145+mmu:15511+mmu:226519+mmu:26409+mmu:26417</a>                                                                                                                                                               | 128 | 4  | 3 | 0.752 |
| KEGG | SMALL_CELL_LUNG_CANCER            | 5222 | <a href="http://www.kegg.jp/kegg-bin/show_pathway?mmu05222+mmu:226519">http://www.kegg.jp/kegg-bin/show_pathway?mmu05222+mmu:226519</a>                                                                                                                                                                                                                           | 85  | 1  | 1 | 0.74  |
| KEGG | MAPK_SIGNALING_PATHWAY            | 4010 | <a href="http://www.kegg.jp/kegg-bin/show_pathway?mmu04010+mmu:12064+mmu:12540+mmu:14169+mmu:15511+mmu:16478+mmu:18590+mmu:21813+mmu:26404+mmu:26406+mmu:26409+mmu:26417+mmu:67603">http://www.kegg.jp/kegg-bin/show_pathway?mmu04010+mmu:12064+mmu:12540+mmu:14169+mmu:15511+mmu:16478+mmu:18590+mmu:21813+mmu:26404+mmu:26406+mmu:26409+mmu:26417+mmu:67603</a> | 271 | 12 | 4 | 0.738 |

|      |                                           |      |                                                                                                                                                                                                                                                                                                                                                                                                             |     |    |   |       |
|------|-------------------------------------------|------|-------------------------------------------------------------------------------------------------------------------------------------------------------------------------------------------------------------------------------------------------------------------------------------------------------------------------------------------------------------------------------------------------------------|-----|----|---|-------|
| KEGG | ARACHIDONIC_ACID_METABOLISM               | 590  | <a href="http://www.kegg.jp/kegg-bin/show_pathway?mmu00590+mmu:67305">http://www.kegg.jp/kegg-bin/show_pathway?mmu00590+mmu:67305</a>                                                                                                                                                                                                                                                                       | 86  | 1  | 1 | 0.736 |
| KEGG | PATHWAYS_IN_CANCER                        | 5200 | <a href="http://www.kegg.jp/kegg-bin/show_pathway?mmu05200+mmu:12402+mmu:12540+mmu:14169+mmu:14369+mmu:16000+mmu:17127+mmu:17295+mmu:18590+mmu:21813+mmu:22027+mmu:22339+mmu:226519+mmu:26417+mmu:56458">http://www.kegg.jp/kegg-bin/show_pathway?mmu05200+mmu:12402+mmu:12540+mmu:14169+mmu:14369+mmu:16000+mmu:17127+mmu:17295+mmu:18590+mmu:21813+mmu:22027+mmu:22339+mmu:226519+mmu:26417+mmu:56458</a> | 323 | 14 | 3 | 0.685 |
| KEGG | NATURAL_KILLER_CELL_MEDIATED_CYTOTOXICITY | 4650 | <a href="http://www.kegg.jp/kegg-bin/show_pathway?mmu04650+mmu:26417+mmu:54446">http://www.kegg.jp/kegg-bin/show_pathway?mmu04650+mmu:26417+mmu:54446</a>                                                                                                                                                                                                                                                   | 150 | 2  | 3 | 0.679 |
| KEGG | LEUKOCYTE_TRANSENDOTHELIAL_MIGRATION      | 4670 | <a href="http://www.kegg.jp/kegg-bin/show_pathway?mmu04670+mmu:11461+mmu:12388+mmu:12540+mmu:18260">http://www.kegg.jp/kegg-bin/show_pathway?mmu04670+mmu:11461+mmu:12388+mmu:12540+mmu:18260</a>                                                                                                                                                                                                           | 120 | 4  | 3 | 0.67  |
| KEGG | TIGHT_JUNCTION                            | 4530 | <a href="http://www.kegg.jp/kegg-bin/show_pathway?mmu04530+mmu:11461+mmu:12540+mmu:18260+mmu:192195+mmu:22612">http://www.kegg.jp/kegg-bin/show_pathway?mmu04530+mmu:11461+mmu:12540+mmu:18260+mmu:192195+mmu:22612</a>                                                                                                                                                                                     | 135 | 5  | 3 | 0.658 |
| KEGG | CELL_CYCLE                                | 4110 | <a href="http://www.kegg.jp/kegg-bin/show_pathway?mmu04110+mmu:17127+mmu:19357+mmu:22631">http://www.kegg.jp/kegg-bin/show_pathway?mmu04110+mmu:17127+mmu:19357+mmu:22631</a>                                                                                                                                                                                                                               | 125 | 3  | 3 | 0.657 |
| KEGG | AMOEBIASIS                                | 5146 | <a href="http://www.kegg.jp/kegg-bin/show_pathway?mmu05146+mmu:226519">http://www.kegg.jp/kegg-bin/show_pathway?mmu05146+mmu:226519</a>                                                                                                                                                                                                                                                                     | 115 | 1  | 1 | 0.65  |
| KEGG | HEPATITIS_C                               | 5160 | <a href="http://www.kegg.jp/kegg-bin/show_pathway?mmu05160+mmu:18260+mmu:26417">http://www.kegg.jp/kegg-bin/show_pathway?mmu05160+mmu:18260+mmu:26417</a>                                                                                                                                                                                                                                                   | 137 | 2  | 2 | 0.63  |

Supplemental Table S3B. TLR5.

| CATEGORY | TERM                              | TERM_ID | URL                                                                                                                                                       | TOTAL_GENES_OF_THE_TERM | UNION_TARGETS_IN_THE_TERM | MIRS_IN_THE_TERM | SCORE |
|----------|-----------------------------------|---------|-----------------------------------------------------------------------------------------------------------------------------------------------------------|-------------------------|---------------------------|------------------|-------|
| KEGG     | T_CELL_RECEPTOR_SIGNALING_PATHWAY | 4660    | <a href="http://www.kegg.jp/kegg-bin/show_pathway?mmu04660+mmu:18481+mmu:54446">http://www.kegg.jp/kegg-bin/show_pathway?mmu04660+mmu:18481+mmu:54446</a> | 109                     | 2                         | 1                | 1.864 |

|      |                                   |      |                                                                                                                                                             |     |   |   |       |
|------|-----------------------------------|------|-------------------------------------------------------------------------------------------------------------------------------------------------------------|-----|---|---|-------|
| KEGG | AXON_GUIDANCE                     | 4360 | <a href="http://www.kegg.jp/kegg-bin/show_pathway?mmu04360+mmu:18481+mmu:54446">http://www.kegg.jp/kegg-bin/show_pathway?mmu04360+mmu:18481+mmu:54446</a>   | 131 | 2 | 1 | 1.719 |
| KEGG | CELL_ADHESION_MOLECULES_(CAMs)    | 4514 | <a href="http://www.kegg.jp/kegg-bin/show_pathway?mmu04514+mmu:18260+mmu:320840">http://www.kegg.jp/kegg-bin/show_pathway?mmu04514+mmu:18260+mmu:320840</a> | 149 | 2 | 1 | 1.62  |
| KEGG | FOCAL_ADHESION                    | 4510 | <a href="http://www.kegg.jp/kegg-bin/show_pathway?mmu04510+mmu:18481+mmu:226519">http://www.kegg.jp/kegg-bin/show_pathway?mmu04510+mmu:18481+mmu:226519</a> | 197 | 2 | 1 | 1.41  |
| KEGG | REGULATION_OF_ACTIN_CYTOSKELETON  | 4810 | <a href="http://www.kegg.jp/kegg-bin/show_pathway?mmu04810+mmu:18481+mmu:216963">http://www.kegg.jp/kegg-bin/show_pathway?mmu04810+mmu:18481+mmu:216963</a> | 215 | 2 | 1 | 1.346 |
| KEGG | ENDOCYTOSIS                       | 4144 | <a href="http://www.kegg.jp/kegg-bin/show_pathway?mmu04144+mmu:216963+mmu:78618">http://www.kegg.jp/kegg-bin/show_pathway?mmu04144+mmu:216963+mmu:78618</a> | 219 | 2 | 1 | 1.333 |
| KEGG | ARGININE_AND_PROLINE_METABOLISM   | 330  | <a href="http://www.kegg.jp/kegg-bin/show_pathway?mmu00330+mmu:18451">http://www.kegg.jp/kegg-bin/show_pathway?mmu00330+mmu:18451</a>                       | 53  | 1 | 1 | 1.087 |
| KEGG | GLUTATHIONE_METABOLISM            | 480  | <a href="http://www.kegg.jp/kegg-bin/show_pathway?mmu00480+mmu:67305">http://www.kegg.jp/kegg-bin/show_pathway?mmu00480+mmu:67305</a>                       | 54  | 1 | 1 | 1.079 |
| KEGG | GLYCOLYSIS_GLUCOGENOGENESIS       | 10   | <a href="http://www.kegg.jp/kegg-bin/show_pathway?mmu00010+mmu:11674">http://www.kegg.jp/kegg-bin/show_pathway?mmu00010+mmu:11674</a>                       | 60  | 1 | 1 | 1.038 |
| KEGG | RENAL_CELL_CARINOMA               | 5211 | <a href="http://www.kegg.jp/kegg-bin/show_pathway?mmu05211+mmu:18481">http://www.kegg.jp/kegg-bin/show_pathway?mmu05211+mmu:18481</a>                       | 71  | 1 | 1 | 0.973 |
| KEGG | B_CELL_RECEPTOR_SIGNALING_PATHWAY | 4662 | <a href="http://www.kegg.jp/kegg-bin/show_pathway?mmu04662+mmu:54446">http://www.kegg.jp/kegg-bin/show_pathway?mmu04662+mmu:54446</a>                       | 76  | 1 | 1 | 0.947 |
| KEGG | VEGF_SIGNALING_PATHWAY            | 4370 | <a href="http://www.kegg.jp/kegg-bin/show_pathway?mmu04370+mmu:54446">http://www.kegg.jp/kegg-bin/show_pathway?mmu04370+mmu:54446</a>                       | 76  | 1 | 1 | 0.947 |

|      |                                                           |      |                                                                                                                                              |     |   |   |       |
|------|-----------------------------------------------------------|------|----------------------------------------------------------------------------------------------------------------------------------------------|-----|---|---|-------|
| KEGG | SALIVARY_<br>SECRETION                                    | 4970 | <a href="http://www.kegg.jp/kegg-bin/show_pathway?mmu04970+mmu:64177">http://www.kegg.jp/kegg-<br/>bin/show_pathway?mmu04970+mmu:64177</a>   | 77  | 1 | 1 | 0.942 |
| KEGG | ECM-<br>RECEPTOR_<br>INTERACTI<br>ON                      | 4512 | <a href="http://www.kegg.jp/kegg-bin/show_pathway?mmu04512+mmu:226519">http://www.kegg.jp/kegg-<br/>bin/show_pathway?mmu04512+mmu:226519</a> | 83  | 1 | 1 | 0.913 |
| KEGG | SMALL_CE<br>LL_LUNG_<br>CANCER                            | 5222 | <a href="http://www.kegg.jp/kegg-bin/show_pathway?mmu05222+mmu:226519">http://www.kegg.jp/kegg-<br/>bin/show_pathway?mmu05222+mmu:226519</a> | 85  | 1 | 1 | 0.904 |
| KEGG | ARACHIDO<br>NIC_ACID_<br>METABOLIS<br>M                   | 590  | <a href="http://www.kegg.jp/kegg-bin/show_pathway?mmu00590+mmu:67305">http://www.kegg.jp/kegg-<br/>bin/show_pathway?mmu00590+mmu:67305</a>   | 86  | 1 | 1 | 0.9   |
| KEGG | ERBB_SIGN<br>ALING_PAT<br>HWAY                            | 4012 | <a href="http://www.kegg.jp/kegg-bin/show_pathway?mmu04012+mmu:18481">http://www.kegg.jp/kegg-<br/>bin/show_pathway?mmu04012+mmu:18481</a>   | 87  | 1 | 1 | 0.896 |
| KEGG | AMOEBIASI<br>S                                            | 5146 | <a href="http://www.kegg.jp/kegg-bin/show_pathway?mmu05146+mmu:226519">http://www.kegg.jp/kegg-<br/>bin/show_pathway?mmu05146+mmu:226519</a> | 115 | 1 | 1 | 0.795 |
| KEGG | LEUKOCYT<br>E_TRANSE<br>NDOTHELI<br>AL_MIGRA<br>TION      | 4670 | <a href="http://www.kegg.jp/kegg-bin/show_pathway?mmu04670+mmu:18260">http://www.kegg.jp/kegg-<br/>bin/show_pathway?mmu04670+mmu:18260</a>   | 120 | 1 | 1 | 0.78  |
| KEGG | CELL_CYCL<br>E                                            | 4110 | <a href="http://www.kegg.jp/kegg-bin/show_pathway?mmu04110+mmu:19357">http://www.kegg.jp/kegg-<br/>bin/show_pathway?mmu04110+mmu:19357</a>   | 125 | 1 | 1 | 0.766 |
| KEGG | TOXOPLAS<br>MOSIS                                         | 5145 | <a href="http://www.kegg.jp/kegg-bin/show_pathway?mmu05145+mmu:226519">http://www.kegg.jp/kegg-<br/>bin/show_pathway?mmu05145+mmu:226519</a> | 128 | 1 | 1 | 0.757 |
| KEGG | TIGHT_JUN<br>CTION                                        | 4530 | <a href="http://www.kegg.jp/kegg-bin/show_pathway?mmu04530+mmu:18260">http://www.kegg.jp/kegg-<br/>bin/show_pathway?mmu04530+mmu:18260</a>   | 135 | 1 | 1 | 0.739 |
| KEGG | HEPATITIS_<br>C                                           | 5160 | <a href="http://www.kegg.jp/kegg-bin/show_pathway?mmu05160+mmu:18260">http://www.kegg.jp/kegg-<br/>bin/show_pathway?mmu05160+mmu:18260</a>   | 137 | 1 | 1 | 0.734 |
| KEGG | NATURAL_<br>KILLER_CE<br>LL_MEDIAT<br>ED_CYTOT<br>OXICITY | 4650 | <a href="http://www.kegg.jp/kegg-bin/show_pathway?mmu04650+mmu:54446">http://www.kegg.jp/kegg-<br/>bin/show_pathway?mmu04650+mmu:54446</a>   | 150 | 1 | 1 | 0.704 |

|      |                            |      |                                                                                                                                            |     |   |   |       |
|------|----------------------------|------|--------------------------------------------------------------------------------------------------------------------------------------------|-----|---|---|-------|
| KEGG | WNT_SIGN<br>ALING_PATHWAY  | 4310 | <a href="http://www.kegg.jp/kegg-bin/show_pathway?mmu04310+mmu:54446">http://www.kegg.jp/kegg-<br/>bin/show_pathway?mmu04310+mmu:54446</a> | 153 | 1 | 1 | 0.698 |
| KEGG | MAPK_SIG<br>NALING_PATHWAY | 4010 | <a href="http://www.kegg.jp/kegg-bin/show_pathway?mmu04010+mmu:26404">http://www.kegg.jp/kegg-<br/>bin/show_pathway?mmu04010+mmu:26404</a> | 271 | 1 | 1 | 0.534 |

Supplemental Table S3C. TLR2.

| CATEGORY | TERM                                                  | TERM_ID | URL                                                                                                                                                                                                                                                                                                                         | TOTAL_GENES_OF<br>_THE_TERM | UNION_TARGETS_IN_TH<br>E_TERM | MIRS_IN_<br>THE_TER<br>M | SCORE |
|----------|-------------------------------------------------------|---------|-----------------------------------------------------------------------------------------------------------------------------------------------------------------------------------------------------------------------------------------------------------------------------------------------------------------------------|-----------------------------|-------------------------------|--------------------------|-------|
| KEGG     | ARGINI<br>NE_AN<br>D_PROLI<br>NE_MET<br>ABOLIS<br>M   | 330     | <a href="http://www.kegg.jp/kegg-bin/show_pathway?mmu00330+mmu:18263+mmu:18451">http://www.kegg.jp/kegg-<br/>bin/show_pathway?mmu00330+mmu:18263+<br/>mmu:18451</a>                                                                                                                                                         | 53                          | 2                             | 2                        | 1.171 |
| KEGG     | GLUTAT<br>HIONE_<br>METAB<br>OLISM                    | 480     | <a href="http://www.kegg.jp/kegg-bin/show_pathway?mmu00480+mmu:18263+mmu:67305">http://www.kegg.jp/kegg-<br/>bin/show_pathway?mmu00480+mmu:18263+<br/>mmu:67305</a>                                                                                                                                                         | 54                          | 2                             | 2                        | 1.164 |
| KEGG     | T_CELL_<br>RECEPT<br>OR_SIG<br>NALING<br>_PATH<br>WAY | 4660    | <a href="http://www.kegg.jp/kegg-bin/show_pathway?mmu04660+mmu:12402+mmu:12540+mmu:17974+mmu:18481+mmu:26395+mmu:26409+mmu:26417+mmu:54446">http://www.kegg.jp/kegg-<br/>bin/show_pathway?mmu04660+mmu:12402+<br/>mmu:12540+mmu:17974+mmu:18481+mmu:2<br/>6395+mmu:26409+mmu:26417+mmu:54446</a>                            | 109                         | 8                             | 4                        | 1.106 |
| KEGG     | AXON_<br>GUIDAN<br>CE                                 | 4360    | <a href="http://www.kegg.jp/kegg-bin/show_pathway?mmu04360+mmu:12540+mmu:17295+mmu:17974+mmu:18481+mmu:20353+mmu:20355+mmu:214968+mmu:26417+mmu:54446">http://www.kegg.jp/kegg-<br/>bin/show_pathway?mmu04360+mmu:12540+<br/>mmu:17295+mmu:17974+mmu:18481+mmu:2<br/>0353+mmu:20355+mmu:214968+mmu:26417+<br/>mmu:54446</a> | 131                         | 9                             | 4                        | 1.098 |
| KEGG     | FOCAL_<br>ADHESI<br>ON                                | 4510    | <a href="http://www.kegg.jp/kegg-bin/show_pathway?mmu04510+mmu:107589+mmu:12540+mmu:16000+mmu:17295+mmu:">http://www.kegg.jp/kegg-<br/>bin/show_pathway?mmu04510+mmu:107589<br/>+mmu:12540+mmu:16000+mmu:17295+mmu:</a>                                                                                                     | 197                         | 13                            | 3                        | 1.049 |

|      |                                  |      |                                                                                                                                                                                                                                                                                                                                                                                                                                                                         |     |    |   |       |
|------|----------------------------------|------|-------------------------------------------------------------------------------------------------------------------------------------------------------------------------------------------------------------------------------------------------------------------------------------------------------------------------------------------------------------------------------------------------------------------------------------------------------------------------|-----|----|---|-------|
|      |                                  |      | 18481+mmu:18590+mmu:18595+mmu:21825+mmu:22330+mmu:22339+mmu:226519+mmu:26395+mmu:26417                                                                                                                                                                                                                                                                                                                                                                                  |     |    |   |       |
| KEGG | REGULATION_OF_ACTIN_CYTOSKELETON | 4810 | <a href="http://www.kegg.jp/kegg-bin/show_pathway?mmu04810+mmu:107589+mmu:12540+mmu:14169+mmu:17886+mmu:18481+mmu:18590+mmu:18595+mmu:19241+mmu:216963+mmu:21844+mmu:22330+mmu:26395+mmu:26417+mmu:83767">http://www.kegg.jp/kegg-bin/show_pathway?mmu04810+mmu:107589+mmu:12540+mmu:14169+mmu:17886+mmu:18481+mmu:18590+mmu:18595+mmu:19241+mmu:216963+mmu:21844+mmu:22330+mmu:26395+mmu:26417+mmu:83767</a>                                                           | 215 | 14 | 4 | 1.018 |
| KEGG | ENDOCYTOSIS                      | 4144 | <a href="http://www.kegg.jp/kegg-bin/show_pathway?mmu04144+mmu:12402+mmu:12540+mmu:15511+mmu:16396+mmu:17295+mmu:18595+mmu:216963+mmu:26385+mmu:67300+mmu:78618+mmu:98366">http://www.kegg.jp/kegg-bin/show_pathway?mmu04144+mmu:12402+mmu:12540+mmu:15511+mmu:16396+mmu:17295+mmu:18595+mmu:216963+mmu:26385+mmu:67300+mmu:78618+mmu:98366</a>                                                                                                                         | 219 | 11 | 4 | 0.975 |
| KEGG | RENAL_CELL_CARCINOMA             | 5211 | <a href="http://www.kegg.jp/kegg-bin/show_pathway?mmu05211+mmu:12540+mmu:17295+mmu:18481+mmu:18590+mmu:22339+mmu:23871+mmu:26395+mmu:26417">http://www.kegg.jp/kegg-bin/show_pathway?mmu05211+mmu:12540+mmu:17295+mmu:18481+mmu:18590+mmu:22339+mmu:23871+mmu:26395+mmu:26417</a>                                                                                                                                                                                       | 71  | 8  | 3 | 0.888 |
| KEGG | CELL_ADHESION_MOLECULES_(CAMs)   | 4514 | <a href="http://www.kegg.jp/kegg-bin/show_pathway?mmu04514+mmu:17528+mmu:18260+mmu:20969+mmu:21367+mmu:320840+mmu:53321+mmu:66797">http://www.kegg.jp/kegg-bin/show_pathway?mmu04514+mmu:17528+mmu:18260+mmu:20969+mmu:21367+mmu:320840+mmu:53321+mmu:66797</a>                                                                                                                                                                                                         | 149 | 7  | 4 | 0.875 |
| KEGG | WNT_SIGNALING_PATHWAY            | 4310 | <a href="http://www.kegg.jp/kegg-bin/show_pathway?mmu04310+mmu:12325+mmu:14369+mmu:16842+mmu:20377+mmu:208846+mmu:22408+mmu:26409+mmu:54446+mmu:67087+mmu:81004">http://www.kegg.jp/kegg-bin/show_pathway?mmu04310+mmu:12325+mmu:14369+mmu:16842+mmu:20377+mmu:208846+mmu:22408+mmu:26409+mmu:54446+mmu:67087+mmu:81004</a>                                                                                                                                             | 153 | 10 | 4 | 0.749 |
| KEGG | PATHWAYS_IN_CANCER               | 5200 | <a href="http://www.kegg.jp/kegg-bin/show_pathway?mmu05200+mmu:12402+mmu:12448+mmu:12540+mmu:14169+mmu:14369+mmu:16000+mmu:16842+mmu:17295+mmu:18590+mmu:18595+mmu:19730+mmu:22027+mmu:22339+mmu:22408+mmu:226519+mmu:26395+mmu:26417">http://www.kegg.jp/kegg-bin/show_pathway?mmu05200+mmu:12402+mmu:12448+mmu:12540+mmu:14169+mmu:14369+mmu:16000+mmu:16842+mmu:17295+mmu:18590+mmu:18595+mmu:19730+mmu:22027+mmu:22339+mmu:22408+mmu:226519+mmu:26395+mmu:26417</a> | 323 | 17 | 3 | 0.726 |
| KEGG | VEGF_SIGNALING                   | 4370 | <a href="http://www.kegg.jp/kegg-bin/show_pathway?mmu04370+mmu:12540+">http://www.kegg.jp/kegg-bin/show_pathway?mmu04370+mmu:12540+</a>                                                                                                                                                                                                                                                                                                                                 | 76  | 5  | 4 | 0.639 |



|      |                                                       |      |                                                                                                                                                                                                                                                                                                                                                                                                                                                                                                                  |     |    |   |       |
|------|-------------------------------------------------------|------|------------------------------------------------------------------------------------------------------------------------------------------------------------------------------------------------------------------------------------------------------------------------------------------------------------------------------------------------------------------------------------------------------------------------------------------------------------------------------------------------------------------|-----|----|---|-------|
| KEGG | G_PATHWAY<br>ERBB_S<br>IGNALIN<br>G_PATH<br>WAY       | 4012 | mmu:22339+mmu:26395+mmu:26417+mmu:54446<br><a href="http://www.kegg.jp/kegg-bin/show_pathway?mmu04012+mmu:12325+mmu:12402+mmu:17974+mmu:18481+mmu:26395+mmu:26417">http://www.kegg.jp/kegg-bin/show_pathway?mmu04012+mmu:12325+mmu:12402+mmu:17974+mmu:18481+mmu:26395+mmu:26417</a>                                                                                                                                                                                                                             | 87  | 6  | 4 | 0.601 |
| KEGG | MAPK_S<br>IGNALI<br>NG_PAT<br>HWAY                    | 4010 | mmu:12290+mmu:12297+mmu:12540+mmu:14169+mmu:15511+mmu:16478+mmu:18590+mmu:18595+mmu:26395+mmu:26404+mmu:26409+mmu:26417<br><a href="http://www.kegg.jp/kegg-bin/show_pathway?mmu04010+mmu:12064+mmu:12290+mmu:12297+mmu:12540+mmu:14169+mmu:15511+mmu:16478+mmu:18590+mmu:18595+mmu:26395+mmu:26404+mmu:26409+mmu:26417">http://www.kegg.jp/kegg-bin/show_pathway?mmu04010+mmu:12064+mmu:12290+mmu:12297+mmu:12540+mmu:14169+mmu:15511+mmu:16478+mmu:18590+mmu:18595+mmu:26395+mmu:26404+mmu:26409+mmu:26417</a> | 271 | 13 | 4 | 0.587 |
| KEGG | SALIVA<br>RY_SEC<br>RETION<br>GLYCOL<br>YSIS_GL       | 4970 | mmu:12314+mmu:22318+mmu:64177<br><a href="http://www.kegg.jp/kegg-bin/show_pathway?mmu04970+mmu:12313+mmu:12314+mmu:22318+mmu:64177">http://www.kegg.jp/kegg-bin/show_pathway?mmu04970+mmu:12313+mmu:12314+mmu:22318+mmu:64177</a>                                                                                                                                                                                                                                                                               | 77  | 4  | 3 | 0.585 |
| KEGG | UCONE<br>OGENES<br>IS                                 | 10   | <a href="http://www.kegg.jp/kegg-bin/show_pathway?mmu00010+mmu:11674+mmu:16828">http://www.kegg.jp/kegg-bin/show_pathway?mmu00010+mmu:11674+mmu:16828</a>                                                                                                                                                                                                                                                                                                                                                        | 60  | 2  | 2 | 0.554 |
| KEGG | B_CELL_<br>RECEPT<br>OR_SIG<br>NALING<br>_PATH<br>WAY | 4662 | <a href="http://www.kegg.jp/kegg-bin/show_pathway?mmu04662+mmu:26395+mmu:26417+mmu:54446">http://www.kegg.jp/kegg-bin/show_pathway?mmu04662+mmu:26395+mmu:26417+mmu:54446</a>                                                                                                                                                                                                                                                                                                                                    | 76  | 3  | 4 | 0.539 |

Supplemental Table S3D. TLR4.

| CATEGORY | TERM                  | TERM_ID | URL                                                                                                                                                                                                                                                                                                                                                               | TOTAL_GENES_OF<br>_THE_TERM | UNION_TARGETS_<br>IN_THE_TERM | MIRS_IN_T<br>HE_TERM | SCORE |
|----------|-----------------------|---------|-------------------------------------------------------------------------------------------------------------------------------------------------------------------------------------------------------------------------------------------------------------------------------------------------------------------------------------------------------------------|-----------------------------|-------------------------------|----------------------|-------|
| KEGG     | ADHERENS<br>_JUNCTION | 4520    | <a href="http://www.kegg.jp/kegg-bin/show_pathway?mmu04520+mmu:11461+mmu:12388+mmu:13000+mmu:16842+mmu:17127+mmu:17295+mmu:21813+mmu:21872+mmu:22330+mmu:22612+mmu:26409+mmu:83767">http://www.kegg.jp/kegg-bin/show_pathway?mmu04520+mmu:11461+mmu:12388+mmu:13000+mmu:16842+mmu:17127+mmu:17295+mmu:21813+mmu:21872+mmu:22330+mmu:22612+mmu:26409+mmu:83767</a> | 74                          | 12                            | 4                    | 2.242 |

|      |                                              |      |                                                                                                                                                                                                                                                                                                                                                                                                                                                                                                                                                                                                |     |    |   |       |
|------|----------------------------------------------|------|------------------------------------------------------------------------------------------------------------------------------------------------------------------------------------------------------------------------------------------------------------------------------------------------------------------------------------------------------------------------------------------------------------------------------------------------------------------------------------------------------------------------------------------------------------------------------------------------|-----|----|---|-------|
| KEGG | ARGININE_<br>AND_PROLI<br>NE_METAB<br>OLISM  | 330  | <a href="http://www.kegg.jp/kegg-bin/show_pathway?mmu00330+mmu:18451">http://www.kegg.jp/kegg-<br/>bin/show_pathway?mmu00330+mmu:18451</a>                                                                                                                                                                                                                                                                                                                                                                                                                                                     | 53  | 2  | 2 | 1.931 |
| KEGG | GLUTATHI<br>ONE_META<br>BOLISM               | 480  | <a href="http://www.kegg.jp/kegg-bin/show_pathway?mmu00480+mmu:18263+mmu:67305">http://www.kegg.jp/kegg-<br/>bin/show_pathway?mmu00480+mmu:18263+mmu:<br/>:67305</a>                                                                                                                                                                                                                                                                                                                                                                                                                           | 54  | 2  | 2 | 1.864 |
| KEGG | PATHWAYS<br>_IN_CANCE<br>R                   | 5200 | <a href="http://www.kegg.jp/kegg-bin/show_pathway?mmu05200+mmu:112406+mmu:12395+mmu:12443+mmu:12448+mmu:12675+mmu:14369+mmu:16842+mmu:17127+mmu:17295+mmu:17311+mmu:18595+mmu:18710+mmu:19211+mmu:19730+mmu:21813+mmu:22027+mmu:22408+mmu:226519+mmu:26395+mmu:56458+mmu:58231">http://www.kegg.jp/kegg-<br/>bin/show_pathway?mmu05200+mmu:112406+mmu:<br/>u:12395+mmu:12443+mmu:12448+mmu:12675+m<br/>mu:14369+mmu:16842+mmu:17127+mmu:17295+<br/>mmu:17311+mmu:18595+mmu:18710+mmu:19211<br/>+mmu:19730+mmu:21813+mmu:22027+mmu:2240<br/>8+mmu:226519+mmu:26395+mmu:56458+mmu:58<br/>231</a> | 323 | 21 | 4 | 1.808 |
| KEGG | WNT_SIGN<br>ALING_PAT<br>HWAY                | 4310 | <a href="http://www.kegg.jp/kegg-bin/show_pathway?mmu04310+mmu:12325+mmu:12443+mmu:13000+mmu:14369+mmu:16842+mmu:17127+mmu:208846+mmu:22408+mmu:26409+mmu:26932+mmu:54446+mmu:67087+mmu:75826+mmu:81004">http://www.kegg.jp/kegg-<br/>bin/show_pathway?mmu04310+mmu:12325+mmu:<br/>:12443+mmu:13000+mmu:14369+mmu:16842+mm<br/>u:17127+mmu:208846+mmu:22408+mmu:26409+m<br/>mu:26932+mmu:54446+mmu:67087+mmu:75826+<br/>mmu:81004</a>                                                                                                                                                          | 153 | 14 | 5 | 1.802 |
| KEGG | AXON_GUI<br>DANCE                            | 4360 | <a href="http://www.kegg.jp/kegg-bin/show_pathway?mmu04360+mmu:12632+mmu:12934+mmu:17295+mmu:18481+mmu:20315+mmu:20353+mmu:20355+mmu:20358+mmu:224105+mmu:268902+mmu:54446">http://www.kegg.jp/kegg-<br/>bin/show_pathway?mmu04360+mmu:12632+mmu:<br/>:12934+mmu:17295+mmu:18481+mmu:20315+mm<br/>u:20353+mmu:20355+mmu:20358+mmu:224105+m<br/>mu:268902+mmu:54446</a>                                                                                                                                                                                                                         | 131 | 11 | 5 | 1.669 |
| KEGG | REGULATIO<br>N_OF_ACTI<br>N_CYTOSKE<br>LETON | 4810 | <a href="http://www.kegg.jp/kegg-bin/show_pathway?mmu04810+mmu:108083+mmu:11461+mmu:12632+mmu:17886+mmu:18481+mmu:18595+mmu:18710+mmu:19046+mmu:216963+mmu:21844+mmu:22330+mmu:224105+mmu:26395+mmu:66922+mmu:83767">http://www.kegg.jp/kegg-<br/>bin/show_pathway?mmu04810+mmu:108083+mm<br/>u:11461+mmu:12632+mmu:17886+mmu:18481+m<br/>mu:18595+mmu:18710+mmu:19046+mmu:216963+<br/>mmu:21844+mmu:22330+mmu:224105+mmu:2639<br/>5+mmu:66922+mmu:83767</a>                                                                                                                                   | 215 | 15 | 5 | 1.504 |
| KEGG | PROSTATE_<br>CANCER                          | 5215 | <a href="http://www.kegg.jp/kegg-bin/show_pathway?mmu05215+mmu:12443+mmu:12448+mmu:12675+mmu:16842+mmu:18595+mmu:18710+mmu:19211+mmu:22027+mmu:26395+mmu:56458">http://www.kegg.jp/kegg-<br/>bin/show_pathway?mmu05215+mmu:12443+mmu:<br/>:12448+mmu:12675+mmu:16842+mmu:18595+mm<br/>u:18710+mmu:19211+mmu:22027+mmu:26395+m<br/>mu:56458</a>                                                                                                                                                                                                                                                 | 89  | 10 | 3 | 1.363 |

|      |                                               |      |                                                                                                                                                                                                                                                                                                                                                                                                                                                                               |     |    |   |       |
|------|-----------------------------------------------|------|-------------------------------------------------------------------------------------------------------------------------------------------------------------------------------------------------------------------------------------------------------------------------------------------------------------------------------------------------------------------------------------------------------------------------------------------------------------------------------|-----|----|---|-------|
| KEGG | FOCAL_AD<br>HESION                            | 4510 | <a href="http://www.kegg.jp/kegg-bin/show_pathway?mmu04510+mmu:11461+mmu:12443+mmu:17295+mmu:18481+mmu:18595+mmu:18710+mmu:19046+mmu:19211+mmu:22330+mmu:224105+mmu:226519+mmu:26395">http://www.kegg.jp/kegg-<br/>bin/show_pathway?mmu04510+mmu:11461+mmu:<br/>:12443+mmu:17295+mmu:18481+mmu:18595+mm<br/>u:18710+mmu:19046+mmu:19211+mmu:22330+m<br/>mu:224105+mmu:226519+mmu:26395</a>                                                                                    | 197 | 12 | 4 | 1.265 |
| KEGG | MAPK_SIG<br>NALING_P<br>ATHWAY                | 4010 | <a href="http://www.kegg.jp/kegg-bin/show_pathway?mmu04010+mmu:12064+mmu:12290+mmu:12294+mmu:12297+mmu:12675+mmu:18595+mmu:21813+mmu:224105+mmu:26395+mmu:26401+mmu:26404+mmu:26406+mmu:26409+mmu:58231+mmu:66922+mmu:67603">http://www.kegg.jp/kegg-<br/>bin/show_pathway?mmu04010+mmu:12064+mmu:<br/>:12290+mmu:12294+mmu:12297+mmu:12675+mm<br/>u:18595+mmu:21813+mmu:224105+mmu:26395+m<br/>mu:26401+mmu:26404+mmu:26406+mmu:26409+<br/>mmu:58231+mmu:66922+mmu:67603</a> | 271 | 16 | 5 | 1.22  |
| KEGG | ENDOCYTO<br>SIS                               | 4144 | <a href="http://www.kegg.jp/kegg-bin/show_pathway?mmu04144+mmu:103967+mmu:13132+mmu:13858+mmu:16396+mmu:17127+mmu:17295+mmu:18595+mmu:216963+mmu:21813+mmu:72685+mmu:78618+mmu:98366">http://www.kegg.jp/kegg-<br/>bin/show_pathway?mmu04144+mmu:103967+mm<br/>u:13132+mmu:13858+mmu:16396+mmu:17127+m<br/>mu:17295+mmu:18595+mmu:216963+mmu:21813+<br/>mmu:72685+mmu:78618+mmu:98366</a>                                                                                     | 219 | 12 | 5 | 1.197 |
| KEGG | COLORECT<br>AL_CANCE<br>R                     | 5210 | <a href="http://www.kegg.jp/kegg-bin/show_pathway?mmu05210+mmu:12443+mmu:16842+mmu:17127+mmu:18710+mmu:19730+mmu:21813+mmu:26395">http://www.kegg.jp/kegg-<br/>bin/show_pathway?mmu05210+mmu:12443+mmu:<br/>:16842+mmu:17127+mmu:18710+mmu:19730+mm<br/>u:21813+mmu:26395</a>                                                                                                                                                                                                 | 65  | 7  | 3 | 1.176 |
| KEGG | T_CELL_RE<br>CEPTOR_SI<br>GNALING_<br>PATHWAY | 4660 | <a href="http://www.kegg.jp/kegg-bin/show_pathway?mmu04660+mmu:12675+mmu:18481+mmu:18710+mmu:224105+mmu:26395+mmu:26409+mmu:54446">http://www.kegg.jp/kegg-<br/>bin/show_pathway?mmu04660+mmu:12675+mmu:<br/>:18481+mmu:18710+mmu:224105+mmu:26395+mm<br/>u:26409+mmu:54446</a>                                                                                                                                                                                               | 109 | 7  | 4 | 1.071 |
| KEGG | PANCREATI<br>C_CANCER                         | 5212 | <a href="http://www.kegg.jp/kegg-bin/show_pathway?mmu05212+mmu:12443+mmu:12675+mmu:17127+mmu:18710+mmu:19730+mmu:21813+mmu:26395">http://www.kegg.jp/kegg-<br/>bin/show_pathway?mmu05212+mmu:12443+mmu:<br/>:12675+mmu:17127+mmu:18710+mmu:19730+mm<br/>u:21813+mmu:26395</a>                                                                                                                                                                                                 | 70  | 7  | 3 | 1.051 |
| KEGG | TIGHT_JUN<br>CTION                            | 4530 | <a href="http://www.kegg.jp/kegg-bin/show_pathway?mmu04530+mmu:11461+mmu:13000+mmu:17879+mmu:17884+mmu:17886+mmu:18260+mmu:19211+mmu:21872+mmu:22612+mmu:66922">http://www.kegg.jp/kegg-<br/>bin/show_pathway?mmu04530+mmu:11461+mmu:<br/>:13000+mmu:17879+mmu:17884+mmu:17886+mm<br/>u:18260+mmu:19211+mmu:21872+mmu:22612+m<br/>mu:66922</a>                                                                                                                                | 135 | 10 | 4 | 1.019 |
| KEGG | RENAL_CEL<br>L_CARCINO<br>MA                  | 5211 | <a href="http://www.kegg.jp/kegg-bin/show_pathway?mmu05211+mmu:112406+mmu:17295+mmu:18481+mmu:18710+mmu:224105+mmu:26395">http://www.kegg.jp/kegg-<br/>bin/show_pathway?mmu05211+mmu:112406+mm<br/>u:17295+mmu:18481+mmu:18710+mmu:224105+m<br/>mu:26395</a>                                                                                                                                                                                                                  | 71  | 6  | 3 | 1.017 |

|      |                                        |      |                                                                                                                                                                                                                                                                 |     |   |   |       |
|------|----------------------------------------|------|-----------------------------------------------------------------------------------------------------------------------------------------------------------------------------------------------------------------------------------------------------------------|-----|---|---|-------|
| KEGG | MELANOMA                               | 5218 | <a href="http://www.kegg.jp/kegg-bin/show_pathway?mmu05218+mmu:12443+mmu:17295+mmu:18595+mmu:18710+mmu:19211+mmu:26395">http://www.kegg.jp/kegg-bin/show_pathway?mmu05218+mmu:12443+mmu:17295+mmu:18595+mmu:18710+mmu:19211+mmu:26395</a>                       | 71  | 6 | 2 | 0.997 |
| KEGG | BACTERIAL_INVASION_OF_EPITHELIAL_CELLS | 5100 | <a href="http://www.kegg.jp/kegg-bin/show_pathway?mmu05100+mmu:103967+mmu:11461+mmu:17295+mmu:18710+mmu:22330+mmu:83767">http://www.kegg.jp/kegg-bin/show_pathway?mmu05100+mmu:103967+mmu:11461+mmu:17295+mmu:18710+mmu:22330+mmu:83767</a>                     | 71  | 6 | 3 | 0.969 |
| KEGG | CELL_ADHESION_MOLECULES(CAMS)          | 4514 | <a href="http://www.kegg.jp/kegg-bin/show_pathway?mmu04514+mmu:18260+mmu:20969+mmu:21367+mmu:320840+mmu:53321+mmu:54725+mmu:66797">http://www.kegg.jp/kegg-bin/show_pathway?mmu04514+mmu:18260+mmu:20969+mmu:21367+mmu:320840+mmu:53321+mmu:54725+mmu:66797</a> | 149 | 7 | 4 | 0.946 |
| KEGG | FC_GAMMA_R-MEDIATED_PHAGOCYTOSIS       | 4666 | <a href="http://www.kegg.jp/kegg-bin/show_pathway?mmu04666+mmu:103967+mmu:12632+mmu:17118+mmu:17357+mmu:18710+mmu:26395+mmu:83767">http://www.kegg.jp/kegg-bin/show_pathway?mmu04666+mmu:103967+mmu:12632+mmu:17118+mmu:17357+mmu:18710+mmu:26395+mmu:83767</a> | 90  | 7 | 3 | 0.92  |
| KEGG | ACUTE_MYELOID_LEUKEMIA                 | 5221 | <a href="http://www.kegg.jp/kegg-bin/show_pathway?mmu05221+mmu:12395+mmu:12443+mmu:12675+mmu:16842+mmu:18710+mmu:26395">http://www.kegg.jp/kegg-bin/show_pathway?mmu05221+mmu:12395+mmu:12443+mmu:12675+mmu:16842+mmu:18710+mmu:26395</a>                       | 57  | 6 | 2 | 0.87  |
| KEGG | P53_SIGNALING_PATHWAY                  | 4115 | <a href="http://www.kegg.jp/kegg-bin/show_pathway?mmu04115+mmu:12443+mmu:12448+mmu:12450+mmu:13663+mmu:18787+mmu:19211">http://www.kegg.jp/kegg-bin/show_pathway?mmu04115+mmu:12443+mmu:12448+mmu:12450+mmu:13663+mmu:18787+mmu:19211</a>                       | 69  | 6 | 2 | 0.863 |
| KEGG | CHRONIC_MYELOID_LEUKEMIA               | 5220 | <a href="http://www.kegg.jp/kegg-bin/show_pathway?mmu05220+mmu:12443+mmu:12675+mmu:17127+mmu:18710+mmu:21813+mmu:26395">http://www.kegg.jp/kegg-bin/show_pathway?mmu05220+mmu:12443+mmu:12675+mmu:17127+mmu:18710+mmu:21813+mmu:26395</a>                       | 73  | 6 | 3 | 0.848 |
| KEGG | NOD-LIKE_RECEPTOR_SIGNALLING_PATHWAY   | 4621 | <a href="http://www.kegg.jp/kegg-bin/show_pathway?mmu04621+mmu:12675+mmu:21929+mmu:22027+mmu:26409+mmu:59079+mmu:66724">http://www.kegg.jp/kegg-bin/show_pathway?mmu04621+mmu:12675+mmu:21929+mmu:22027+mmu:26409+mmu:59079+mmu:66724</a>                       | 62  | 6 | 2 | 0.8   |
| KEGG | GLIOMA                                 | 5214 | <a href="http://www.kegg.jp/kegg-bin/show_pathway?mmu05214+mmu:12325+mmu:12443+mmu:18595+mmu:18710+mmu:19211+mmu:26395">http://www.kegg.jp/kegg-bin/show_pathway?mmu05214+mmu:12325+mmu:12443+mmu:18595+mmu:18710+mmu:19211+mmu:26395</a>                       | 65  | 6 | 3 | 0.794 |

|      |                                        |      |                                                                                                                                                                                                                                                                                   |     |   |   |       |
|------|----------------------------------------|------|-----------------------------------------------------------------------------------------------------------------------------------------------------------------------------------------------------------------------------------------------------------------------------------|-----|---|---|-------|
| KEGG | SMALL_CELL_LUNG_CANCER                 | 5222 | <a href="http://www.kegg.jp/kegg-bin/show_pathway?mmu05222+mmu:12443+mmu:12448+mmu:12675+mmu:18710+mmu:19211+mmu:226519">http://www.kegg.jp/kegg-bin/show_pathway?mmu05222+mmu:12443+mmu:12448+mmu:12675+mmu:18710+mmu:19211+mmu:226519</a>                                       | 85  | 6 | 3 | 0.76  |
| KEGG | MELANOGENESIS                          | 4916 | <a href="http://www.kegg.jp/kegg-bin/show_pathway?mmu04916+mmu:12325+mmu:14369+mmu:16842+mmu:17311+mmu:22408+mmu:26395">http://www.kegg.jp/kegg-bin/show_pathway?mmu04916+mmu:12325+mmu:14369+mmu:16842+mmu:17311+mmu:22408+mmu:26395</a>                                         | 100 | 6 | 4 | 0.753 |
| KEGG | GAP_JUNCTION                           | 4540 | <a href="http://www.kegg.jp/kegg-bin/show_pathway?mmu04540+mmu:14609+mmu:15560+mmu:18595+mmu:21872+mmu:26395">http://www.kegg.jp/kegg-bin/show_pathway?mmu04540+mmu:14609+mmu:15560+mmu:18595+mmu:21872+mmu:26395</a>                                                             | 88  | 5 | 2 | 0.75  |
| KEGG | ENDOMETRIAL_CANCER                     | 5213 | <a href="http://www.kegg.jp/kegg-bin/show_pathway?mmu05213+mmu:12443+mmu:16842+mmu:18710+mmu:19211+mmu:26395">http://www.kegg.jp/kegg-bin/show_pathway?mmu05213+mmu:12443+mmu:16842+mmu:18710+mmu:19211+mmu:26395</a>                                                             | 52  | 5 | 2 | 0.74  |
| KEGG | LEUKOCYTE_DOTHELIAL_MIGRATION          | 4670 | <a href="http://www.kegg.jp/kegg-bin/show_pathway?mmu04670+mmu:11461+mmu:12388+mmu:18260+mmu:18710+mmu:19229+mmu:20315+mmu:22330">http://www.kegg.jp/kegg-bin/show_pathway?mmu04670+mmu:11461+mmu:12388+mmu:18260+mmu:18710+mmu:19229+mmu:20315+mmu:22330</a>                     | 120 | 7 | 4 | 0.728 |
| KEGG | B_CELL_RECEPTOR_SIGNALING_PATHWAY      | 4662 | <a href="http://www.kegg.jp/kegg-bin/show_pathway?mmu04662+mmu:12675+mmu:18710+mmu:26395+mmu:54446">http://www.kegg.jp/kegg-bin/show_pathway?mmu04662+mmu:12675+mmu:18710+mmu:26395+mmu:54446</a>                                                                                 | 76  | 4 | 4 | 0.678 |
| KEGG | CELL_CYCLE                             | 4110 | <a href="http://www.kegg.jp/kegg-bin/show_pathway?mmu04110+mmu:12443+mmu:12448+mmu:13559+mmu:17127+mmu:19357+mmu:22628">http://www.kegg.jp/kegg-bin/show_pathway?mmu04110+mmu:12443+mmu:12448+mmu:13559+mmu:17127+mmu:19357+mmu:22628</a>                                         | 125 | 6 | 4 | 0.644 |
| KEGG | CYTOKINE-CYTOKINE_RECEPTOR_INTERACTION | 4060 | <a href="http://www.kegg.jp/kegg-bin/show_pathway?mmu04060+mmu:11479+mmu:11480+mmu:17295+mmu:17311+mmu:18383+mmu:18595+mmu:20315+mmu:21813">http://www.kegg.jp/kegg-bin/show_pathway?mmu04060+mmu:11479+mmu:11480+mmu:17295+mmu:17311+mmu:18383+mmu:18595+mmu:20315+mmu:21813</a> | 262 | 8 | 3 | 0.638 |
| KEGG | ERBB_SIGNALING_PATHWAY                 | 4012 | <a href="http://www.kegg.jp/kegg-bin/show_pathway?mmu04012+mmu:12325+mmu:18481+mmu:18710+mmu:224105+mmu:26395">http://www.kegg.jp/kegg-bin/show_pathway?mmu04012+mmu:12325+mmu:18481+mmu:18710+mmu:224105+mmu:26395</a>                                                           | 87  | 5 | 4 | 0.636 |
| KEGG | TGF-BETA_SIGNALING                     | 4350 | <a href="http://www.kegg.jp/kegg-bin/show_pathway?mmu04350+mmu:11480+mmu:13559+mmu:17127+mmu:21813">http://www.kegg.jp/kegg-bin/show_pathway?mmu04350+mmu:11480+mmu:13559+mmu:17127+mmu:21813</a>                                                                                 | 85  | 4 | 3 | 0.635 |

|      |                                                                                                                      |      |                                                                                                                                                                                                                                                                                                                          |     |   |   |       |
|------|----------------------------------------------------------------------------------------------------------------------|------|--------------------------------------------------------------------------------------------------------------------------------------------------------------------------------------------------------------------------------------------------------------------------------------------------------------------------|-----|---|---|-------|
| KEGG | ALING_PAT<br>HWAY<br>PPAR_SIGN<br>ALING_PAT<br>HWAY                                                                  | 3320 | <a href="http://www.kegg.jp/kegg-bin/show_pathway?mmu03320+mmu:14081+mmu:26569+mmu:50790">http://www.kegg.jp/kegg-<br/>bin/show_pathway?mmu03320+mmu:14081+mmu:<br/>:26569+mmu:50790</a>                                                                                                                                 | 80  | 3 | 2 | 0.632 |
| KEGG | NEUROTRO<br>PHIN_SIGN<br>ALING_PAT<br>HWAY                                                                           | 4722 | <a href="http://www.kegg.jp/kegg-bin/show_pathway?mmu04722+mmu:12064+mmu:12325+mmu:18710+mmu:22628+mmu:26395+mmu:26401+mmu:26406">http://www.kegg.jp/kegg-<br/>bin/show_pathway?mmu04722+mmu:12064+mmu:<br/>:12325+mmu:18710+mmu:22628+mmu:26395+mm<br/>u:26401+mmu:26406</a>                                            | 131 | 7 | 4 | 0.63  |
| KEGG | NEUROACT<br>IVE_LIGAN<br>D-<br>RECEPTOR_<br>INTERACTI<br>ON                                                          | 4080 | <a href="http://www.kegg.jp/kegg-bin/show_pathway?mmu04080+mmu:107515+mmu:108073+mmu:11552+mmu:12311+mmu:12424+mmu:14401+mmu:15560+mmu:19219+mmu:19220">http://www.kegg.jp/kegg-<br/>bin/show_pathway?mmu04080+mmu:107515+mm<br/>u:108073+mmu:11552+mmu:12311+mmu:12424+m<br/>mu:14401+mmu:15560+mmu:19219+mmu:19220</a> | 320 | 9 | 4 | 0.629 |
| KEGG | GLYCOLYSI<br>S_GLUCON<br>EOGENESIS<br>ARRHYTH<br>MOGENIC_<br>RIGHT_VEN<br>TRICULAR_<br>CARDIOMY<br>OPATHY_(A<br>RVC) | 10   | <a href="http://www.kegg.jp/kegg-bin/show_pathway?mmu00010+mmu:11674+mmu:16828">http://www.kegg.jp/kegg-<br/>bin/show_pathway?mmu00010+mmu:11674+mmu:<br/>:16828</a>                                                                                                                                                     | 60  | 2 | 2 | 0.62  |
| KEGG | VEGF_SIGN<br>ALING_PAT<br>HWAY                                                                                       | 5412 | <a href="http://www.kegg.jp/kegg-bin/show_pathway?mmu05412+mmu:11461+mmu:12294+mmu:12297+mmu:14609+mmu:16842">http://www.kegg.jp/kegg-<br/>bin/show_pathway?mmu05412+mmu:11461+mmu:<br/>:12294+mmu:12297+mmu:14609+mmu:16842</a>                                                                                         | 74  | 5 | 3 | 0.605 |
| KEGG | CALCIUM_S<br>IGNALING_<br>PATHWAY                                                                                    | 4370 | <a href="http://www.kegg.jp/kegg-bin/show_pathway?mmu04370+mmu:18710+mmu:26395+mmu:54446">http://www.kegg.jp/kegg-<br/>bin/show_pathway?mmu04370+mmu:18710+mmu:<br/>:26395+mmu:54446</a>                                                                                                                                 | 76  | 3 | 4 | 0.594 |
| KEGG | CHAGAS_D<br>ISEASE                                                                                                   | 4020 | <a href="http://www.kegg.jp/kegg-bin/show_pathway?mmu04020+mmu:12290+mmu:12325+mmu:15560+mmu:18595+mmu:19220+mmu:19229">http://www.kegg.jp/kegg-<br/>bin/show_pathway?mmu04020+mmu:12290+mmu:<br/>:12325+mmu:15560+mmu:18595+mmu:19220+mm<br/>u:19229</a>                                                                | 178 | 6 | 4 | 0.588 |
| KEGG | OOCYTE_M<br>EIOSIS                                                                                                   | 5142 | <a href="http://www.kegg.jp/kegg-bin/show_pathway?mmu05142+mmu:12675+mmu:17127+mmu:18710+mmu:18787+mmu:21813">http://www.kegg.jp/kegg-<br/>bin/show_pathway?mmu05142+mmu:12675+mmu:<br/>:17127+mmu:18710+mmu:18787+mmu:21813</a>                                                                                         | 102 | 5 | 3 | 0.582 |
| KEGG |                                                                                                                      | 4114 | <a href="http://www.kegg.jp/kegg-bin/show_pathway?mmu04114+mmu:12325+mmu">http://www.kegg.jp/kegg-<br/>bin/show_pathway?mmu04114+mmu:12325+mmu</a>                                                                                                                                                                       | 112 | 6 | 3 | 0.578 |

|      |                                       |      |                                                                                                                                                                                                                             |    |   |   |       |
|------|---------------------------------------|------|-----------------------------------------------------------------------------------------------------------------------------------------------------------------------------------------------------------------------------|----|---|---|-------|
|      |                                       |      | :12448+mmu:19046+mmu:22628+mmu:26395+mmu:26932                                                                                                                                                                              |    |   |   |       |
| KEGG | PHOSPHATIDYLINOSITOL_SIGNALING_SYSTEM | 4070 | <a href="http://www.kegg.jp/kegg-bin/show_pathway?mmu04070+mmu:104418+mmu:108083+mmu:18710+mmu:19211+mmu:212111">http://www.kegg.jp/kegg-bin/show_pathway?mmu04070+mmu:104418+mmu:108083+mmu:18710+mmu:19211+mmu:212111</a> | 78 | 5 | 2 | 0.557 |
| KEGG | ADIPOCYTOKINE_SIGNALING_PATHWAY       | 4920 | <a href="http://www.kegg.jp/kegg-bin/show_pathway?mmu04920+mmu:12675+mmu:14081+mmu:50790">http://www.kegg.jp/kegg-bin/show_pathway?mmu04920+mmu:12675+mmu:14081+mmu:50790</a>                                               | 68 | 3 | 3 | 0.541 |
| KEGG | NON-SMALL_CELL_LUNG_CANCER            | 5223 | <a href="http://www.kegg.jp/kegg-bin/show_pathway?mmu05223+mmu:12443+mmu:18710+mmu:26395+mmu:58231">http://www.kegg.jp/kegg-bin/show_pathway?mmu05223+mmu:12443+mmu:18710+mmu:26395+mmu:58231</a>                           | 54 | 4 | 2 | 0.515 |
| KEGG | BASAL_CELL_CARCINOMA                  | 5217 | <a href="http://www.kegg.jp/kegg-bin/show_pathway?mmu05217+mmu:14369+mmu:16842+mmu:22408">http://www.kegg.jp/kegg-bin/show_pathway?mmu05217+mmu:14369+mmu:16842+mmu:22408</a>                                               | 55 | 3 | 2 | 0.506 |
